# Supplementary material for: Comparison of methodologies used to determine aromatic lignin unit ratios in lignocellulosic biomass
Source: Biotechnol Biofuels. 2021 Mar 6;14:58. doi: 10.1186/s13068-021-01897-y (PMC7936455; doi:10.1186/s13068-021-01897-y)
Supplement: Supplementary file 2 — Additional file 2. Pearson correlation coefficients for various characteristics measured in the poplar samples. [file 13068_2021_1897_MOESM2_ESM.xlsx]

## Sheet: Sheet1
Poplar set only Pearson correlation coefficients	Manders ssNMR S/G	ssNMR deconvoluted S/G	BO4	B-B	B-5	HSQC S/G	H umol/g biomass	S umol/g biomass	G umol/g biomass	S/G thio	Sum umol/g biomass thio yield	lignin content MBMS	S/G MBMS	mz_50	mz_51	mz_52	mz_53	mz_54	mz_55	mz_56	mz_57	mz_58	mz_59	mz_60	mz_61	mz_62	mz_63	mz_64	mz_65	mz_66	mz_67	mz_68	mz_69	mz_70	mz_71	mz_72	mz_73	mz_74	mz_75	mz_76	mz_77	mz_78	mz_79	mz_80	mz_81	mz_82	mz_83	mz_84	mz_85
Manders ssNMR S/G	1	0.786323	0.505954	0.078284	-0.745745	0.803673	-0.274426	0.31109	-0.642576	0.763081	-0.0151739	0.416754	0.813874	-0.00660242	0.104828	-0.447207	-0.291038	0.0775879	0.319929	-0.0101782	0.0459046	0.530996	0.669782	-0.170329	-0.18132	-0.230985	-0.157573	-0.0271172	-0.626976	-0.693812	-0.152537	0.0374202	-0.0709793	-0.120202	-0.00614527	-0.0283141	-0.141741	-0.0190812	0.0137182	-0.0823321	-0.160483	-0.0995202	0.20159	-0.31185	-0.487498	0.598383	0.313506	0.0607606	-0.00801664
ssNMR deconvoluted S/G	0.786323	1	0.636317	-0.0992773	-0.804136	0.940216	-0.234528	0.419038	-0.678832	0.9086	0.0573607	0.46918	0.941552	0.0453714	0.0102863	-0.285571	-0.243655	0.0477568	0.104924	0.0595571	0.0909267	0.342146	0.659151	-0.0894425	-0.146927	-0.0466926	-0.11189	-0.193802	-0.701912	-0.780899	-0.103877	0.0640959	-0.0760845	-0.0802742	0.0476753	0.000191889	-0.0540433	0.0911872	-0.121207	0.119019	-0.279938	-0.157531	0.211812	-0.197018	-0.683187	0.568595	0.304831	-0.038733	-0.104526
BO4	0.505954	0.636317	1	-0.670458	-0.877561	0.610909	-0.130515	0.400349	-0.514405	0.698255	0.110681	0.453759	0.71208	-0.0653867	-0.119028	-0.153507	-0.309938	-0.0603369	0.283819	-0.107844	-0.0320156	0.281181	0.527555	-0.210006	-0.204236	-0.103644	0.158918	-0.0724562	-0.440353	-0.578969	0.0165857	0.0316946	-0.155135	-0.220979	-0.127393	-0.174565	-0.173888	-0.154731	-0.186737	-0.0128307	-0.170096	-0.0887387	0.0516749	-0.150487	-0.657532	0.379367	0.318299	0.00775402	-0.0557929
B-B	0.078284	-0.0992773	-0.670458	1	0.244911	-0.0151375	0.129607	-0.101725	0.125273	-0.200164	-0.0298945	-0.023269	-0.0995683	-0.245	0.207758	-0.211156	-0.0743824	-0.0538222	-0.0234607	0.0686706	-0.00804663	0.191683	-0.183459	0.047602	0.0910301	-0.182782	-0.156288	-0.157533	-0.0850595	0.00790588	-0.283149	-0.0562404	0.0246015	0.053141	0.0773151	0.117191	0.00775271	0.073247	0.272313	-0.334592	0.0876188	0.0516244	0.119459	-0.0137757	0.0995587	-0.0527437	-0.181898	-0.126712	0.105966
B-5	-0.745745	-0.804136	-0.877561	0.244911	1	-0.827131	0.104603	-0.456196	0.602375	-0.796426	-0.11964	-0.569505	-0.870894	0.196904	0.0144999	0.319051	0.433637	0.0962735	-0.377786	0.0969007	0.0349695	-0.48934	-0.595918	0.250201	0.224665	0.251468	-0.13298	0.158472	0.633757	0.757468	0.128495	-0.00197068	0.183384	0.246422	0.118889	0.153844	0.224148	0.139114	0.0903328	0.185416	0.185258	0.0822314	-0.165173	0.181336	0.783267	-0.472303	-0.331382	0.0401653	0.0144828
HSQC S/G	0.803673	0.940216	0.610909	-0.0151375	-0.827131	1	-0.198798	0.55361	-0.567881	0.841368	0.212223	0.401283	0.955619	-0.00789786	0.0317503	-0.174711	-0.158326	0.171799	0.241974	0.169873	0.211471	0.459267	0.719372	-0.0421728	-0.0853173	-0.0890724	-0.129382	-0.16979	-0.806618	-0.850581	-0.0898277	0.130962	0.0593843	0.0203476	0.129766	0.051072	-0.00865161	0.189789	0.119845	-0.0329776	-0.388479	-0.271736	0.167427	-0.0663432	-0.62187	0.733043	0.455568	0.139434	0.0585622
H umol/g biomass	-0.274426	-0.234528	-0.130515	0.129607	0.104603	-0.198798	1	0.476202	0.554143	-0.272305	0.619021	0.522327	-0.146058	-0.391563	-0.439533	-0.362822	-0.490944	-0.678002	-0.273816	-0.632128	-0.64631	-0.361071	-0.66733	-0.654423	-0.628223	-0.543936	0.587506	0.376897	-0.017775	0.0446612	0.238934	-0.692925	-0.687838	-0.702503	-0.717488	-0.786528	-0.704872	-0.660859	-0.130077	-0.0951538	0.702273	0.680466	0.625392	-0.437103	0.141822	-0.389703	0.180384	-0.524881	-0.629287
S umol/g biomass	0.31109	0.419038	0.400349	-0.101725	-0.456196	0.55361	0.476202	1	0.252888	0.320091	0.915681	0.58975	0.593568	-0.489663	-0.585229	-0.29832	-0.322167	-0.237152	-0.16681	-0.220631	-0.240084	0.0327896	0.0670603	-0.372553	-0.368026	-0.373448	0.0122044	0.177363	-0.655703	-0.666229	0.0766354	-0.274447	-0.27189	-0.399128	-0.324157	-0.451719	-0.396554	-0.256977	0.0989451	-0.0719963	0.0687558	0.120813	0.301958	-0.26751	-0.295363	0.460083	0.592238	-0.14696	-0.204118
G umol/g biomass	-0.642576	-0.678832	-0.514405	0.125273	0.602375	-0.567881	0.554143	0.252888	1	-0.805083	0.62039	-0.0727766	-0.584148	-0.340976	-0.506357	0.0594427	-0.00875962	-0.358673	-0.459942	-0.241898	-0.348239	-0.430221	-0.707122	-0.07581	-0.0492032	-0.0428649	-0.0267932	0.359218	0.379311	0.408058	0.0313927	-0.175866	-0.138954	-0.202295	-0.28888	-0.265228	-0.164892	-0.229807	0.0826312	-0.141347	0.268603	0.201277	-0.0595207	-0.0149401	0.517808	-0.366939	-0.116278	-0.21833	-0.0678263
S/G thio	0.763081	0.9086	0.698255	-0.200164	-0.796426	0.841368	-0.272305	0.320091	-0.805083	1	-0.0750165	0.446887	0.882478	0.0899907	0.108871	-0.252744	-0.177271	0.162214	0.265453	0.0679563	0.141351	0.313732	0.628687	-0.17853	-0.231091	-0.200403	-0.040495	-0.180164	-0.685056	-0.738932	0.0374318	-0.0647771	-0.0765084	-0.0697358	0.0516571	-0.0351646	-0.104491	0.0331484	-0.175234	0.282449	-0.16048	-0.0687063	0.277792	-0.167633	-0.655099	0.56178	0.411344	0.07741	-0.154881
Sum umol/g biomass thio yield	-0.0151739	0.0573607	0.110681	-0.0298945	-0.11964	0.212223	0.619021	0.915681	0.62039	-0.0750165	1	0.449531	0.238083	-0.53886	-0.684717	-0.218527	-0.26662	-0.343327	-0.326281	-0.281497	-0.341232	-0.152981	-0.241156	-0.335878	-0.321096	-0.32245	0.00168727	0.293712	-0.373768	-0.370099	0.0761299	-0.298047	-0.280704	-0.409863	-0.385065	-0.478813	-0.392341	-0.306043	0.113531	-0.117095	0.170027	0.184213	0.222726	-0.224699	-0.0243001	0.218647	0.431893	-0.211644	-0.196214
lignin content MBMS	0.416754	0.46918	0.453759	-0.023269	-0.569505	0.401283	0.522327	0.58975	-0.0727766	0.446887	0.449531	1	0.537504	-0.398755	-0.363902	-0.720683	-0.885633	-0.702128	-0.112796	-0.755286	-0.763337	-0.088049	-0.171546	-0.813026	-0.780605	-0.593207	0.400651	0.193596	-0.488262	-0.574762	-0.200288	-0.698603	-0.818538	-0.85404	-0.789363	-0.778126	-0.814653	-0.764488	-0.509938	0.0594725	0.478839	0.629899	0.660379	-0.723385	-0.53055	-0.0248534	0.202863	-0.549392	-0.607584
S/G MBMS	0.813874	0.941552	0.71208	-0.0995683	-0.870894	0.955619	-0.146058	0.593568	-0.584148	0.882478	0.238083	0.537504	1	-0.174834	-0.0578207	-0.28621	-0.293974	0.0498967	0.166335	0.0549904	0.0905504	0.437729	0.661683	-0.130668	-0.139863	-0.140198	-0.0708413	-0.270822	-0.849557	-0.916753	-0.161341	0.0473683	-0.0597855	-0.113524	0.0260248	-0.0457256	-0.099933	0.0564536	0.00692977	-0.0513039	-0.306189	-0.172182	0.178219	-0.151868	-0.768175	0.665149	0.433396	0.00111198	0.00390561
mz_50	-0.00660242	0.0453714	-0.0653867	-0.245	0.196904	-0.00789786	-0.391563	-0.489663	-0.340976	0.0899907	-0.53886	-0.398755	-0.174834	1	0.622063	0.479626	0.43797	0.467507	0.30443	0.229563	0.359839	-0.0835604	0.163779	0.182714	0.0595399	0.354081	-0.146747	0.0850427	0.241726	0.299998	0.0792494	0.209406	0.341758	0.416754	0.25524	0.238191	0.242869	0.268915	0.0377567	0.37299	-0.145609	-0.235077	-0.0936769	0.0811394	0.389094	0.123279	-0.0745224	0.575166	0.0507311
mz_51	0.104828	0.0102863	-0.119028	0.207758	0.0144999	0.0317503	-0.439533	-0.585229	-0.506357	0.108871	-0.684717	-0.363902	-0.0578207	0.622063	1	0.480976	0.252516	0.488458	0.521471	0.405412	0.492212	0.28747	0.241978	0.275638	0.257085	0.222512	0.0174867	-0.350449	0.0274258	0.120745	-0.294893	0.292637	0.471509	0.531685	0.416521	0.456228	0.335903	0.408606	0.226359	-0.128036	-0.361957	-0.352724	-0.146492	0.307591	0.06966	0.215849	-0.135344	0.559564	0.34362
mz_52	-0.447207	-0.285571	-0.153507	-0.211156	0.319051	-0.174711	-0.362822	-0.29832	0.0594427	-0.252744	-0.218527	-0.720683	-0.28621	0.479626	0.480976	1	0.652979	0.633623	0.0643757	0.748881	0.696666	-0.128731	0.0899078	0.722999	0.675314	0.698956	-0.301436	-0.360606	0.273185	0.369195	-0.0811873	0.642944	0.802637	0.821775	0.713865	0.680214	0.752674	0.701565	0.495237	-0.12498	-0.629446	-0.730789	-0.650195	0.616489	0.264858	0.222302	-0.199453	0.588551	0.56876
mz_53	-0.291038	-0.243655	-0.309938	-0.0743824	0.433637	-0.158326	-0.490944	-0.322167	-0.00875962	-0.177271	-0.26662	-0.885633	-0.293974	0.43797	0.252516	0.652979	1	0.808936	0.1882	0.753534	0.846162	0.185691	0.307362	0.707403	0.639685	0.45181	-0.497186	-0.174347	0.193871	0.290987	0.374537	0.616946	0.807804	0.824293	0.773953	0.669354	0.717412	0.772016	0.537983	0.158802	-0.44469	-0.61138	-0.515835	0.741057	0.456474	0.248634	0.131746	0.68391	0.538896
mz_54	0.0775879	0.0477568	-0.0603369	-0.0538222	0.0962735	0.171799	-0.678002	-0.237152	-0.358673	0.162214	-0.343327	-0.702128	0.0498967	0.467507	0.488458	0.633623	0.808936	1	0.421283	0.819536	0.903468	0.326608	0.611242	0.630046	0.594167	0.399234	-0.465417	-0.294515	-0.165506	-0.039118	0.134328	0.603307	0.873119	0.862729	0.82923	0.715595	0.707533	0.7781	0.640686	0.0486034	-0.605489	-0.695801	-0.487459	0.559104	0.215104	0.6336	0.272684	0.86725	0.648788
mz_55	0.319929	0.104924	0.283819	-0.0234607	-0.377786	0.241974	-0.273816	-0.16681	-0.459942	0.265453	-0.326281	-0.112796	0.166335	0.30443	0.521471	0.0643757	0.1882	0.421283	1	0.125724	0.360796	0.709155	0.487602	-0.0691915	-0.0323521	-0.269762	0.0871544	-0.0349452	-0.255958	-0.236682	0.0716435	0.127293	0.221803	0.20333	0.157628	0.0957075	-0.0270786	0.101198	0.387174	-0.228211	-0.10393	-0.166213	0.0346518	0.242778	-0.0695165	0.312517	0.321342	0.641562	0.375412
mz_56	-0.0101782	0.0595571	-0.107844	0.0686706	0.0969007	0.169873	-0.632128	-0.220631	-0.241898	0.0679563	-0.281497	-0.755286	0.0549904	0.229563	0.405412	0.748881	0.753534	0.819536	0.125724	1	0.935977	0.241558	0.512497	0.896034	0.854213	0.602229	-0.528586	-0.484865	-0.0117469	0.0658968	0.0224841	0.809361	0.936509	0.951862	0.981819	0.924087	0.928324	0.953925	0.611157	-0.148851	-0.810326	-0.887678	-0.66419	0.746984	0.0366646	0.491722	-0.0282194	0.562596	0.703202
mz_57	0.0459046	0.0909267	-0.0320156	-0.00804663	0.0349695	0.211471	-0.64631	-0.240084	-0.348239	0.141351	-0.341232	-0.763337	0.0905504	0.359839	0.492212	0.696666	0.846162	0.903468	0.360796	0.935977	1	0.443528	0.628723	0.796895	0.755488	0.492762	-0.454296	-0.46067	-0.111742	-0.0235525	0.133662	0.776365	0.928115	0.932887	0.936705	0.841983	0.831564	0.926879	0.653867	-0.102235	-0.745474	-0.833102	-0.568493	0.790817	0.0710982	0.544709	0.165827	0.734401	0.711567
mz_58	0.530996	0.342146	0.281181	0.191683	-0.48934	0.459267	-0.361071	0.0327896	-0.430221	0.313732	-0.152981	-0.088049	0.437729	-0.0835604	0.28747	-0.128731	0.185691	0.326608	0.709155	0.241558	0.443528	1	0.706756	0.169092	0.237211	-0.111027	-0.125113	-0.351694	-0.48528	-0.525238	-0.106038	0.401612	0.302372	0.238828	0.2997	0.272576	0.142494	0.316867	0.439382	-0.453843	-0.370993	-0.35568	-0.138193	0.401622	-0.362882	0.420916	0.31507	0.408128	0.552072
mz_59	0.669782	0.659151	0.527555	-0.183459	-0.595918	0.719372	-0.66733	0.0670603	-0.707122	0.628687	-0.241156	-0.171546	0.661683	0.163779	0.241978	0.0899078	0.307362	0.611242	0.487602	0.512497	0.628723	0.706756	1	0.380596	0.375605	0.224229	-0.266032	-0.343501	-0.545688	-0.576984	0.00857417	0.560783	0.488902	0.452725	0.550419	0.487759	0.428876	0.550105	0.369905	-0.130042	-0.637681	-0.578459	-0.275195	0.3149	-0.424659	0.707812	0.356513	0.485486	0.502079
mz_60	-0.170329	-0.0894425	-0.210006	0.047602	0.250201	-0.0421728	-0.654423	-0.372553	-0.07581	-0.17853	-0.335878	-0.813026	-0.130668	0.182714	0.275638	0.722999	0.707403	0.630046	-0.0691915	0.896034	0.796895	0.169092	0.380596	1	0.979805	0.827798	-0.596793	-0.560199	0.232807	0.246134	-0.145713	0.928876	0.882011	0.905554	0.931785	0.953783	0.987704	0.907147	0.506571	-0.250451	-0.809484	-0.894036	-0.855476	0.729974	0.0356082	0.206841	-0.359782	0.36867	0.762024
mz_61	-0.18132	-0.146927	-0.204236	0.0910301	0.224665	-0.0853173	-0.628223	-0.368026	-0.0492032	-0.231091	-0.321096	-0.780605	-0.139863	0.0595399	0.257085	0.675314	0.639685	0.594167	-0.0323521	0.854213	0.755488	0.237211	0.375605	0.979805	1	0.803023	-0.553907	-0.630929	0.201723	0.213421	-0.227605	0.928601	0.858558	0.865209	0.902376	0.93392	0.961848	0.857959	0.557657	-0.391178	-0.795798	-0.874393	-0.890918	0.714018	-0.0214717	0.180563	-0.381811	0.34044	0.830678
mz_62	-0.230985	-0.0466926	-0.103644	-0.182782	0.251468	-0.0890724	-0.543936	-0.373448	-0.0428649	-0.200403	-0.32245	-0.593207	-0.140198	0.354081	0.222512	0.698956	0.45181	0.399234	-0.269762	0.602229	0.492762	-0.111027	0.224229	0.827798	0.803023	1	-0.481042	-0.557948	0.293397	0.278202	-0.363642	0.807333	0.653862	0.684508	0.662424	0.72453	0.819625	0.64553	0.28002	-0.191185	-0.686631	-0.739395	-0.82232	0.378912	-0.0164356	0.0576996	-0.553183	0.211246	0.572906
mz_63	-0.157573	-0.11189	0.158918	-0.156288	-0.13298	-0.129382	0.587506	0.0122044	-0.0267932	-0.040495	0.00168727	0.400651	-0.0708413	-0.146747	0.0174867	-0.301436	-0.497186	-0.465417	0.0871544	-0.528586	-0.454296	-0.125113	-0.266032	-0.596793	-0.553907	-0.481042	1	0.245948	-0.0286679	0.0213405	0.258295	-0.60119	-0.60364	-0.552745	-0.573171	-0.570619	-0.572436	-0.488466	-0.313118	-0.0257245	0.475333	0.650742	0.664063	-0.254582	-0.0534977	-0.383808	0.202209	-0.367101	-0.552729
mz_64	-0.0271172	-0.193802	-0.0724562	-0.157533	0.158472	-0.16979	0.376897	0.177363	0.359218	-0.180164	0.293712	0.193596	-0.270822	0.0850427	-0.350449	-0.360606	-0.174347	-0.294515	-0.0349452	-0.484865	-0.46067	-0.351694	-0.343501	-0.560199	-0.630929	-0.557948	0.245948	1	0.270567	0.265302	0.532596	-0.580028	-0.460036	-0.478057	-0.551696	-0.562336	-0.554749	-0.501179	-0.338721	0.439832	0.574506	0.560475	0.531418	-0.403504	0.568739	-0.165139	0.303859	-0.108446	-0.591879
mz_65	-0.626976	-0.701912	-0.440353	-0.0850595	0.633757	-0.806618	-0.017775	-0.655703	0.379311	-0.685056	-0.373768	-0.488262	-0.849557	0.241726	0.0274258	0.273185	0.193871	-0.165506	-0.255958	-0.0117469	-0.111742	-0.48528	-0.545688	0.232807	0.201723	0.293397	-0.0286679	0.270567	1	0.961546	0.13996	0.10156	0.0292816	0.105199	0.0204051	0.139916	0.195701	-0.037448	-0.228881	0.0991836	0.197577	0.0462699	-0.289403	0.0968518	0.565791	-0.70685	-0.657636	-0.179749	-0.0756942
mz_66	-0.693812	-0.780899	-0.578969	0.00790588	0.757468	-0.850581	0.0446612	-0.666229	0.408058	-0.738932	-0.370099	-0.574762	-0.916753	0.299998	0.120745	0.369195	0.290987	-0.039118	-0.236682	0.0658968	-0.0235525	-0.525238	-0.576984	0.246134	0.213421	0.278202	0.0213405	0.265302	0.961546	1	0.208696	0.0681902	0.106118	0.18752	0.0800298	0.158151	0.226319	0.0245532	-0.0829708	0.0971506	0.218912	0.0509304	-0.243215	0.120791	0.705609	-0.644916	-0.561901	-0.0733692	-0.0706707
mz_67	-0.152537	-0.103877	0.0165857	-0.283149	0.128495	-0.0898277	0.238934	0.0766354	0.0313927	0.0374318	0.0761299	-0.200288	-0.161341	0.0792494	-0.294893	-0.0811873	0.374537	0.134328	0.0716435	0.0224841	0.133662	-0.106038	0.00857417	-0.145713	-0.227605	-0.363642	0.258295	0.532596	0.13996	0.208696	1	-0.243435	-0.102796	-0.065176	-0.0320585	-0.198569	-0.12294	-0.0101421	-0.00567659	0.469338	0.362846	0.261804	0.370805	0.131467	0.415761	-0.0810331	0.517171	0.0413866	-0.396305
mz_68	0.0374202	0.0640959	0.0316946	-0.0562404	-0.00197068	0.130962	-0.692925	-0.274447	-0.175866	-0.0647771	-0.298047	-0.698603	0.0473683	0.209406	0.292637	0.642944	0.616946	0.603307	0.127293	0.809361	0.776365	0.401612	0.560783	0.928876	0.928601	0.807333	-0.60119	-0.580028	0.10156	0.0681902	-0.243435	1	0.854629	0.834626	0.861691	0.883721	0.904058	0.83433	0.561496	-0.409759	-0.855465	-0.94764	-0.886403	0.664141	-0.102481	0.326732	-0.292629	0.448315	0.849786
mz_69	-0.0709793	-0.0760845	-0.155135	0.0246015	0.183384	0.0593843	-0.687838	-0.27189	-0.138954	-0.0765084	-0.280704	-0.818538	-0.0597855	0.341758	0.471509	0.802637	0.807804	0.873119	0.221803	0.936509	0.928115	0.302372	0.488902	0.882011	0.858558	0.653862	-0.60364	-0.460036	0.0292816	0.106118	-0.102796	0.854629	1	0.976635	0.942148	0.902403	0.904592	0.915331	0.674951	-0.204198	-0.8169	-0.913556	-0.769551	0.736995	0.169207	0.515206	-0.0312607	0.739469	0.831199
mz_70	-0.120202	-0.0802742	-0.220979	0.053141	0.246422	0.0203476	-0.702503	-0.399128	-0.202295	-0.0697358	-0.409863	-0.85404	-0.113524	0.416754	0.531685	0.821775	0.824293	0.862729	0.20333	0.951862	0.932887	0.238828	0.452725	0.905554	0.865209	0.684508	-0.552745	-0.478057	0.105199	0.18752	-0.065176	0.834626	0.976635	1	0.966205	0.938083	0.936132	0.94319	0.60778	-0.126221	-0.792134	-0.880834	-0.723711	0.759932	0.170804	0.404432	-0.123681	0.685817	0.771395
mz_71	-0.00614527	0.0476753	-0.127393	0.0773151	0.118889	0.129766	-0.717488	-0.324157	-0.28888	0.0516571	-0.385065	-0.789363	0.0260248	0.25524	0.416521	0.713865	0.773953	0.82923	0.157628	0.981819	0.936705	0.2997	0.550419	0.931785	0.902376	0.662424	-0.573171	-0.551696	0.0204051	0.0800298	-0.0320585	0.861691	0.942148	0.966205	1	0.960912	0.959694	0.95683	0.600552	-0.163668	-0.812115	-0.89694	-0.726455	0.748972	0.00781587	0.429	-0.112894	0.562907	0.763406
mz_72	-0.0283141	0.000191889	-0.174565	0.117191	0.153844	0.051072	-0.786528	-0.451719	-0.265228	-0.0351646	-0.478813	-0.778126	-0.0457256	0.238191	0.456228	0.680214	0.669354	0.715595	0.0957075	0.924087	0.841983	0.272576	0.487759	0.953783	0.93392	0.72453	-0.570619	-0.562336	0.139916	0.158151	-0.198569	0.883721	0.902403	0.938083	0.960912	1	0.969961	0.931031	0.46401	-0.199332	-0.84961	-0.88444	-0.777824	0.736035	-0.025791	0.304559	-0.305617	0.46351	0.780361
mz_73	-0.141741	-0.0540433	-0.173888	0.00775271	0.224148	-0.00865161	-0.704872	-0.396554	-0.164892	-0.104491	-0.392341	-0.814653	-0.099933	0.242869	0.335903	0.752674	0.717412	0.707533	-0.0270786	0.928324	0.831564	0.142494	0.428876	0.987704	0.961848	0.819625	-0.572436	-0.554749	0.195701	0.226319	-0.12294	0.904058	0.904592	0.936132	0.959694	0.969961	1	0.92258	0.502908	-0.18764	-0.820957	-0.893658	-0.830511	0.707172	0.0335237	0.267162	-0.31564	0.427497	0.748175
mz_74	-0.0190812	0.0911872	-0.154731	0.073247	0.139114	0.189789	-0.660859	-0.256977	-0.229807	0.0331484	-0.306043	-0.764488	0.0564536	0.268915	0.408606	0.701565	0.772016	0.7781	0.101198	0.953925	0.926879	0.316867	0.550105	0.907147	0.857959	0.64553	-0.488466	-0.501179	-0.037448	0.0245532	-0.0101421	0.83433	0.915331	0.94319	0.95683	0.931031	0.92258	1	0.547582	-0.115565	-0.85975	-0.867524	-0.627058	0.818239	0.0235302	0.440558	-0.0268916	0.544786	0.70944
mz_75	0.0137182	-0.121207	-0.186737	0.272313	0.0903328	0.119845	-0.130077	0.0989451	0.0826312	-0.175234	0.113531	-0.509938	0.00692977	0.0377567	0.226359	0.495237	0.537983	0.640686	0.387174	0.611157	0.653867	0.439382	0.369905	0.506571	0.557657	0.28002	-0.313118	-0.338721	-0.228881	-0.0829708	-0.00567659	0.561496	0.674951	0.60778	0.600552	0.46401	0.502908	0.547582	1	-0.596716	-0.432459	-0.611866	-0.460008	0.429466	0.175204	0.480589	0.195252	0.605214	0.712902
mz_76	-0.0823321	0.119019	-0.0128307	-0.334592	0.185416	-0.0329776	-0.0951538	-0.0719963	-0.141347	0.282449	-0.117095	0.0594725	-0.0513039	0.37299	-0.128036	-0.12498	0.158802	0.0486034	-0.228211	-0.148851	-0.102235	-0.453843	-0.130042	-0.250451	-0.391178	-0.191185	-0.0257245	0.439832	0.0991836	0.0971506	0.469338	-0.409759	-0.204198	-0.126221	-0.163668	-0.199332	-0.18764	-0.115565	-0.596716	1	0.293137	0.350316	0.392053	-0.139414	0.243334	-0.0647841	0.239878	-0.00390496	-0.557193
mz_77	-0.160483	-0.279938	-0.170096	0.0876188	0.185258	-0.388479	0.702273	0.0687558	0.268603	-0.16048	0.170027	0.478839	-0.306189	-0.145609	-0.361957	-0.629446	-0.44469	-0.605489	-0.10393	-0.810326	-0.745474	-0.370993	-0.637681	-0.809484	-0.795798	-0.686631	0.475333	0.574506	0.197577	0.218912	0.362846	-0.855465	-0.8169	-0.792134	-0.812115	-0.84961	-0.820957	-0.85975	-0.432459	0.293137	1	0.915361	0.701726	-0.656574	0.290248	-0.560303	0.0918851	-0.46998	-0.775778
mz_78	-0.0995202	-0.157531	-0.0887387	0.0516244	0.0822314	-0.271736	0.680466	0.120813	0.201277	-0.0687063	0.184213	0.629899	-0.172182	-0.235077	-0.352724	-0.730789	-0.61138	-0.695801	-0.166213	-0.887678	-0.833102	-0.35568	-0.578459	-0.894036	-0.874393	-0.739395	0.650742	0.560475	0.0462699	0.0509304	0.261804	-0.94764	-0.913556	-0.880834	-0.89694	-0.88444	-0.893658	-0.867524	-0.611866	0.350316	0.915361	1	0.834984	-0.657387	0.129108	-0.529359	0.159891	-0.56319	-0.843873
mz_79	0.20159	0.211812	0.0516749	0.119459	-0.165173	0.167427	0.625392	0.301958	-0.0595207	0.277792	0.222726	0.660379	0.178219	-0.0936769	-0.146492	-0.650195	-0.515835	-0.487459	0.0346518	-0.66419	-0.568493	-0.138193	-0.275195	-0.855476	-0.890918	-0.82232	0.664063	0.531418	-0.289403	-0.243215	0.370805	-0.886403	-0.769551	-0.723711	-0.726455	-0.777824	-0.830511	-0.627058	-0.460008	0.392053	0.701726	0.834984	1	-0.504958	0.00655236	-0.162578	0.461464	-0.361297	-0.827593
mz_80	-0.31185	-0.197018	-0.150487	-0.0137757	0.181336	-0.0663432	-0.437103	-0.26751	-0.0149401	-0.167633	-0.224699	-0.723385	-0.151868	0.0811394	0.307591	0.616489	0.741057	0.559104	0.242778	0.746984	0.790817	0.401622	0.3149	0.729974	0.714018	0.378912	-0.254582	-0.403504	0.0968518	0.120791	0.131467	0.664141	0.736995	0.759932	0.748972	0.736035	0.707172	0.818239	0.429466	-0.139414	-0.656574	-0.657387	-0.504958	1	0.0462793	0.144065	0.0242219	0.469461	0.65347
mz_81	-0.487498	-0.683187	-0.657532	0.0995587	0.783267	-0.62187	0.141822	-0.295363	0.517808	-0.655099	-0.0243001	-0.53055	-0.768175	0.389094	0.06966	0.264858	0.456474	0.215104	-0.0695165	0.0366646	0.0710982	-0.362882	-0.424659	0.0356082	-0.0214717	-0.0164356	-0.0534977	0.568739	0.565791	0.705609	0.415761	-0.102481	0.169207	0.170804	0.00781587	-0.025791	0.0335237	0.0235302	0.175204	0.243334	0.290248	0.129108	0.00655236	0.0462793	1	-0.189656	0.0513419	0.30477	-0.0955337
mz_82	0.598383	0.568595	0.379367	-0.0527437	-0.472303	0.733043	-0.389703	0.460083	-0.366939	0.56178	0.218647	-0.0248534	0.665149	0.123279	0.215849	0.222302	0.248634	0.6336	0.312517	0.491722	0.544709	0.420916	0.707812	0.206841	0.180563	0.0576996	-0.383808	-0.165139	-0.70685	-0.644916	-0.0810331	0.326732	0.515206	0.404432	0.429	0.304559	0.267162	0.440558	0.480589	-0.0647841	-0.560303	-0.529359	-0.162578	0.144065	-0.189656	1	0.600015	0.625205	0.393966
mz_83	0.313506	0.304831	0.318299	-0.181898	-0.331382	0.455568	0.180384	0.592238	-0.116278	0.411344	0.431893	0.202863	0.433396	-0.0745224	-0.135344	-0.199453	0.131746	0.272684	0.321342	-0.0282194	0.165827	0.31507	0.356513	-0.359782	-0.381811	-0.553183	0.202209	0.303859	-0.657636	-0.561901	0.517171	-0.292629	-0.0312607	-0.123681	-0.112894	-0.305617	-0.31564	-0.0268916	0.195252	0.239878	0.0918851	0.159891	0.461464	0.0242219	0.0513419	0.600015	1	0.367173	-0.159176
mz_84	0.0607606	-0.038733	0.00775402	-0.126712	0.0401653	0.139434	-0.524881	-0.14696	-0.21833	0.07741	-0.211644	-0.549392	0.00111198	0.575166	0.559564	0.588551	0.68391	0.86725	0.641562	0.562596	0.734401	0.408128	0.485486	0.36867	0.34044	0.211246	-0.367101	-0.108446	-0.179749	-0.0733692	0.0413866	0.448315	0.739469	0.685817	0.562907	0.46351	0.427497	0.544786	0.605214	-0.00390496	-0.46998	-0.56319	-0.361297	0.469461	0.30477	0.625205	0.367173	1	0.613345
mz_85	-0.00801664	-0.104526	-0.0557929	0.105966	0.0144828	0.0585622	-0.629287	-0.204118	-0.0678263	-0.154881	-0.196214	-0.607584	0.00390561	0.0507311	0.34362	0.56876	0.538896	0.648788	0.375412	0.703202	0.711567	0.552072	0.502079	0.762024	0.830678	0.572906	-0.552729	-0.591879	-0.0756942	-0.0706707	-0.396305	0.849786	0.831199	0.771395	0.763406	0.780361	0.748175	0.70944	0.712902	-0.557193	-0.775778	-0.843873	-0.827593	0.65347	-0.0955337	0.393966	-0.159176	0.613345	1
mz_86	0.339774	0.145536	0.0464408	0.215711	-0.185442	0.211393	-0.413303	-0.230584	-0.262725	-0.00694961	-0.297077	-0.384325	0.126423	0.104409	0.238361	0.085437	0.336405	0.321679	0.50626	0.355842	0.473052	0.780679	0.580659	0.472728	0.522412	0.316517	-0.330403	-0.378616	-0.054011	-0.105129	-0.144789	0.682816	0.430069	0.406819	0.455679	0.462394	0.416273	0.420936	0.566564	-0.588822	-0.406752	-0.538213	-0.465706	0.37604	-0.146254	0.159554	-0.145447	0.318209	0.659758
mz_87	-0.0518067	-0.0905067	-0.136661	0.121748	0.105205	0.0365534	-0.675077	-0.363475	-0.20955	-0.0491349	-0.383887	-0.660542	-0.0583139	0.358486	0.575678	0.725547	0.629887	0.770619	0.442258	0.774756	0.783199	0.380875	0.418272	0.750356	0.764789	0.58496	-0.589246	-0.570036	0.00479284	0.0521492	-0.343534	0.771789	0.874311	0.872881	0.822934	0.814652	0.775146	0.737013	0.660066	-0.325999	-0.712756	-0.834707	-0.746687	0.624464	0.00345826	0.385373	-0.21827	0.733378	0.893899
mz_88	-0.194966	-0.302791	-0.173473	-0.0340354	0.263241	-0.214102	-0.4871	-0.356709	0.0643966	-0.348553	-0.26432	-0.862259	-0.306818	0.239468	0.264535	0.665296	0.753475	0.598922	0.143854	0.737634	0.742304	0.278198	0.298242	0.827126	0.825066	0.625965	-0.514348	-0.299697	0.376316	0.39973	0.0559683	0.852846	0.822205	0.782317	0.763177	0.741509	0.791945	0.704139	0.616513	-0.359187	-0.566654	-0.779437	-0.812055	0.649695	0.320354	0.176251	-0.199534	0.501214	0.71828
mz_89	-0.350549	-0.23059	-0.151768	-0.203374	0.314128	-0.221985	-0.643717	-0.425539	0.0798525	-0.309555	-0.314378	-0.697891	-0.283643	0.253949	0.246327	0.744755	0.515543	0.427023	-0.22216	0.672979	0.534979	-0.112899	0.144897	0.851898	0.821114	0.849415	-0.50517	-0.371332	0.432426	0.390182	-0.298906	0.776736	0.731525	0.746514	0.699901	0.811316	0.844294	0.707087	0.158468	-0.080235	-0.755134	-0.750158	-0.841075	0.597226	0.10082	0.0541763	-0.496258	0.286735	0.618335
mz_90	-0.149402	-0.105395	-0.310185	0.203386	0.280407	-0.160909	0.367656	0.158989	0.343447	-0.131078	0.27229	0.174444	-0.16693	-0.122194	-0.518502	-0.447835	0.0452242	-0.324019	-0.104408	-0.410977	-0.327496	-0.0520221	-0.340228	-0.307613	-0.336288	-0.327915	-0.141776	0.270908	0.0575639	0.0211588	0.306145	-0.345664	-0.40838	-0.372322	-0.355472	-0.410386	-0.377717	-0.342222	-0.143032	0.29913	0.555392	0.423994	0.320604	-0.144316	0.154686	-0.401049	0.0357059	-0.258278	-0.305258
mz_91	0.342441	0.408912	0.409635	-0.0545263	-0.512204	0.383789	0.528041	0.565169	-0.118689	0.485014	0.410709	0.920259	0.490445	-0.340539	-0.307822	-0.703266	-0.728637	-0.546264	0.0627458	-0.710032	-0.649851	-0.0331017	-0.129537	-0.877606	-0.859431	-0.773403	0.523083	0.303818	-0.554725	-0.590736	0.0524194	-0.812204	-0.789396	-0.804136	-0.75761	-0.795083	-0.851333	-0.709105	-0.472634	0.234227	0.537097	0.712784	0.822245	-0.579576	-0.417029	0.0154926	0.446813	-0.386375	-0.644375
mz_92	-0.179741	-0.211483	-0.0546961	-0.0938076	0.101722	-0.270707	0.456533	-0.0834614	0.0307175	0.00620531	-0.0525785	0.287148	-0.260462	0.107778	0.0284517	-0.359679	-0.22833	-0.3436	0.126494	-0.537378	-0.419425	-0.259522	-0.4485	-0.699264	-0.749262	-0.73773	0.632771	0.634818	0.17487	0.213266	0.528328	-0.790461	-0.57963	-0.519565	-0.594687	-0.614953	-0.667798	-0.537683	-0.543487	0.545438	0.706452	0.766674	0.789999	-0.236282	0.322381	-0.372551	0.322206	-0.170096	-0.739879
mz_93	-0.182214	-0.218085	0.11186	-0.305625	0.0717535	-0.39121	0.224665	-0.225771	0.105657	-0.201146	-0.137868	0.174491	-0.32364	0.0811248	-0.199936	-0.0865045	-0.415484	-0.459434	-0.336091	-0.394303	-0.53306	-0.628758	-0.442542	-0.222252	-0.223014	0.109777	0.201354	0.28943	0.600061	0.529063	-0.00384515	-0.229045	-0.417343	-0.382931	-0.384591	-0.31457	-0.213783	-0.522223	-0.412173	0.0463284	0.431886	0.313193	-0.0121091	-0.596496	0.123542	-0.517289	-0.530311	-0.480237	-0.431876
mz_94	-0.679909	-0.760315	-0.551924	-0.0168206	0.73525	-0.837678	0.0384005	-0.679727	0.384547	-0.718624	-0.390761	-0.544492	-0.907487	0.340603	0.13113	0.361402	0.26125	-0.0568815	-0.207924	0.0316072	-0.0536984	-0.53324	-0.576879	0.219778	0.184844	0.283517	0.0248439	0.273245	0.966529	0.995578	0.183653	0.0554189	0.0780905	0.16562	0.0524453	0.135748	0.202687	-0.0087314	-0.105762	0.106346	0.234351	0.0636795	-0.234113	0.0836665	0.684503	-0.662409	-0.592422	-0.0726433	-0.0809765
mz_95	-0.317037	-0.509164	-0.475303	0.0987664	0.566956	-0.504438	-0.435067	-0.605969	0.187484	-0.545277	-0.414834	-0.86714	-0.617166	0.349677	0.223559	0.44041	0.715742	0.417777	0.0582279	0.472302	0.496551	0.112582	0.0230915	0.643387	0.617645	0.475015	-0.479907	-0.0104036	0.659818	0.669302	0.144075	0.604595	0.593241	0.600058	0.534878	0.574417	0.595943	0.490891	0.327518	-0.0887238	-0.242481	-0.459043	-0.61663	0.498402	0.596961	-0.161515	-0.340166	0.362231	0.471455
mz_96	0.356791	0.370102	0.217806	-0.0141199	-0.264986	0.409827	-0.605081	-0.0411261	-0.324478	0.194072	-0.170283	-0.452104	0.359448	0.0646598	0.152528	0.332902	0.465963	0.48661	0.119399	0.674225	0.690355	0.586013	0.731194	0.75791	0.760559	0.624001	-0.542144	-0.570739	-0.176255	-0.232345	-0.176069	0.900068	0.678242	0.631611	0.72487	0.712792	0.720969	0.724147	0.50282	-0.411886	-0.771497	-0.831356	-0.684725	0.510786	-0.295172	0.456082	-0.0742577	0.312327	0.700423
mz_97	-0.106284	-0.07997	-0.143844	-0.0219627	0.211484	-0.0280886	-0.700815	-0.357305	-0.106556	-0.138984	-0.336474	-0.816114	-0.117327	0.30808	0.351309	0.769802	0.733242	0.705657	0.00485268	0.889665	0.819698	0.172413	0.404713	0.962697	0.935262	0.824583	-0.676618	-0.507929	0.229134	0.247481	-0.170374	0.935267	0.930761	0.922616	0.919077	0.923954	0.96015	0.86679	0.535072	-0.226721	-0.796568	-0.927879	-0.894162	0.651943	0.112092	0.324678	-0.301828	0.509194	0.776791
mz_98	-0.0907513	-0.108369	-0.239228	0.0517585	0.265703	0.0377641	-0.587628	-0.29904	-0.164899	-0.0550906	-0.312892	-0.818722	-0.123908	0.519613	0.566983	0.799426	0.863432	0.934558	0.337234	0.877235	0.925204	0.251386	0.429493	0.738314	0.687287	0.506163	-0.497409	-0.305053	0.0171848	0.151439	0.0663433	0.686323	0.94455	0.943872	0.868386	0.782917	0.783241	0.849475	0.692156	-0.055643	-0.651958	-0.775745	-0.566919	0.67458	0.343392	0.518841	0.110016	0.848111	0.690296
mz_99	-0.0379772	0.0070883	-0.130154	-0.0165556	0.171067	0.133608	-0.516568	-0.164135	-0.128396	-0.0317005	-0.188342	-0.788141	-0.0107694	0.432823	0.419567	0.751437	0.869368	0.825077	0.212204	0.86863	0.933276	0.339319	0.493263	0.796202	0.739519	0.588544	-0.516218	-0.381572	-0.0215978	0.0743376	0.103475	0.798875	0.921846	0.899374	0.860121	0.763473	0.79975	0.881966	0.693819	-0.141374	-0.704031	-0.83681	-0.612013	0.719678	0.241443	0.515126	0.13131	0.724017	0.67703
mz_100	0.136435	0.253621	0.0676854	0.0510613	-0.120499	0.366319	-0.612307	-0.106721	-0.381718	0.246434	-0.247024	-0.585107	0.280099	0.18755	0.449698	0.69538	0.621249	0.779098	0.199631	0.957639	0.916608	0.366526	0.63017	0.831456	0.806355	0.58482	-0.456693	-0.637631	-0.230032	-0.16425	-0.1055	0.804824	0.884485	0.891544	0.941404	0.875978	0.8673	0.924133	0.621792	-0.247835	-0.868404	-0.901158	-0.612949	0.700913	-0.20187	0.591172	0.0257463	0.544998	0.720716
mz_101	-0.238084	-0.228778	-0.494997	0.238346	0.491447	-0.153291	-0.55785	-0.469643	-0.0111273	-0.294567	-0.387216	-0.908966	-0.311069	0.326772	0.345301	0.669277	0.84122	0.720968	0.0567809	0.843477	0.810045	0.173527	0.297461	0.894828	0.858549	0.665001	-0.527178	-0.378346	0.256686	0.347435	0.0459506	0.772153	0.850481	0.905971	0.886425	0.871637	0.892621	0.881494	0.605369	-0.13339	-0.613386	-0.730678	-0.654507	0.719389	0.322409	0.144041	-0.23739	0.490206	0.681794
mz_102	-0.0723698	-0.0774438	-0.276154	0.144715	0.269719	-0.0314529	-0.781801	-0.43188	-0.112848	-0.163089	-0.399793	-0.685381	-0.119137	0.244752	0.375611	0.627547	0.540594	0.643011	-0.00798668	0.764496	0.651073	0.136408	0.372229	0.873663	0.875768	0.793402	-0.65132	-0.520911	0.145356	0.158321	-0.43532	0.813567	0.82784	0.845099	0.82832	0.909922	0.89087	0.78957	0.425967	-0.20987	-0.798664	-0.809866	-0.824447	0.526807	0.0255117	0.270336	-0.423452	0.446328	0.802097
mz_103	-0.604014	-0.615909	-0.404154	0.173734	0.433368	-0.627128	0.682894	-0.00583935	0.58538	-0.514592	0.240459	0.285548	-0.547799	-0.370801	-0.299599	-0.216547	-0.432963	-0.577601	-0.308347	-0.539041	-0.659687	-0.60974	-0.868489	-0.490658	-0.43848	-0.414001	0.481834	0.346958	0.359861	0.407827	0.0616655	-0.68129	-0.575603	-0.528666	-0.576845	-0.532255	-0.500639	-0.603593	-0.316032	0.061125	0.662744	0.678161	0.401131	-0.331358	0.256102	-0.66679	-0.217464	-0.506467	-0.482178
mz_104	-0.17122	-0.286058	-0.247234	0.154351	0.222214	-0.389289	0.58827	-0.0325787	0.286257	-0.229327	0.094793	0.445293	-0.324051	-0.100074	-0.208191	-0.655309	-0.420894	-0.651182	-0.0527577	-0.841526	-0.716402	-0.170118	-0.6059	-0.78072	-0.770006	-0.679274	0.497224	0.523112	0.174058	0.158747	0.200299	-0.797067	-0.77883	-0.754403	-0.823703	-0.780076	-0.82268	-0.759091	-0.55717	0.305032	0.854584	0.894855	0.718786	-0.4457	0.264916	-0.591326	0.0894213	-0.412167	-0.685072
mz_105	0.0953144	0.205937	0.345032	-0.253383	-0.310707	0.194844	0.667916	0.502949	-0.0177973	0.351366	0.402747	0.694679	0.25692	-0.0584174	-0.245635	-0.461336	-0.444241	-0.405321	0.104706	-0.649077	-0.512578	-0.177918	-0.248684	-0.866846	-0.895082	-0.748245	0.604991	0.458486	-0.362349	-0.327915	0.40447	-0.827579	-0.700929	-0.709371	-0.726919	-0.852692	-0.834112	-0.67761	-0.361369	0.380409	0.670175	0.725458	0.849801	-0.495155	-0.0647593	-0.0287276	0.587975	-0.198151	-0.746901
mz_106	0.184614	0.353099	0.50271	-0.305518	-0.484173	0.376738	0.569371	0.710083	0.0328754	0.426519	0.590742	0.845273	0.463406	-0.250781	-0.363799	-0.425844	-0.624419	-0.459296	-0.0287708	-0.60021	-0.570921	-0.21604	-0.1751	-0.786442	-0.79376	-0.613781	0.462296	0.340008	-0.512574	-0.533586	0.0892934	-0.722776	-0.656246	-0.699594	-0.690089	-0.764648	-0.753446	-0.635506	-0.383353	0.257061	0.418809	0.56264	0.68196	-0.524786	-0.329712	0.130492	0.494962	-0.264285	-0.597955
mz_107	-0.367151	-0.450456	-0.369759	0.107297	0.415364	-0.556797	0.678111	-0.0753414	0.456355	-0.404992	0.130915	0.322764	-0.523428	-0.0590924	-0.319028	-0.514425	-0.35418	-0.66074	-0.215487	-0.789199	-0.739762	-0.443416	-0.773238	-0.695488	-0.704777	-0.557415	0.468085	0.63	0.40801	0.414674	0.317842	-0.780097	-0.758803	-0.711257	-0.78666	-0.757176	-0.735364	-0.755791	-0.512805	0.332273	0.915665	0.879568	0.638856	-0.485295	0.445029	-0.724077	-0.0557566	-0.482983	-0.740305
mz_108	-0.182993	-0.154837	-0.0150086	-0.324344	0.183665	-0.237676	0.316523	-0.0733509	0.0510874	0.0119766	-0.0366726	0.130313	-0.274989	0.409037	-0.0880609	-0.258102	0.0558443	-0.170843	0.146485	-0.498329	-0.29631	-0.240979	-0.313495	-0.57986	-0.672642	-0.499081	0.340459	0.66639	0.215329	0.233163	0.630451	-0.598752	-0.448623	-0.403305	-0.508858	-0.580393	-0.561215	-0.459957	-0.434659	0.690945	0.672277	0.618945	0.60766	-0.236074	0.460694	-0.301652	0.347532	0.040409	-0.641233
mz_109	-0.56974	-0.760278	-0.591708	0.115354	0.691547	-0.784914	0.329855	-0.374588	0.586659	-0.716547	-0.0590165	-0.221908	-0.843566	0.170112	-0.0645197	-0.084316	0.0978563	-0.290078	-0.0650196	-0.39082	-0.340538	-0.33191	-0.699428	-0.258197	-0.28058	-0.260546	0.153324	0.608912	0.716432	0.735641	0.291304	-0.356662	-0.259211	-0.229924	-0.379479	-0.314924	-0.31002	-0.354375	-0.239546	0.232748	0.579031	0.466813	0.199058	-0.0566053	0.77474	-0.645272	-0.18694	-0.0792856	-0.30498
mz_110	-0.0556246	-0.114274	-0.208634	0.0241982	0.223469	-0.0518756	0.332603	0.171082	0.108641	0.0311331	0.184897	0.0508277	-0.121762	0.235373	0.00858115	-0.206199	0.211543	0.125415	0.219298	-0.251196	-0.0341889	-0.00727204	-0.14193	-0.494559	-0.559146	-0.613892	0.270929	0.553414	-0.186629	-0.0466656	0.607723	-0.551684	-0.19663	-0.206385	-0.306552	-0.448513	-0.463753	-0.209624	-0.0311111	0.524054	0.485692	0.482331	0.642683	-0.0695594	0.529977	0.116691	0.727829	0.296743	-0.425932
mz_111	0.797104	0.785726	0.750337	-0.296056	-0.80459	0.764103	-0.0443555	0.531183	-0.529448	0.823187	0.210718	0.577665	0.79369	-0.0347687	-0.237796	-0.515257	-0.301843	-0.0227167	0.314722	-0.246071	-0.128913	0.325778	0.545308	-0.441528	-0.467204	-0.41976	0.00850384	0.208205	-0.630942	-0.71436	0.194855	-0.229888	-0.308389	-0.368921	-0.257593	-0.364737	-0.396985	-0.290546	-0.14058	0.202584	0.123221	0.148875	0.375632	-0.426134	-0.459446	0.499765	0.551632	0.0234314	-0.261155
mz_112	0.617418	0.694786	0.369068	-0.0918826	-0.460867	0.71887	-0.031992	0.448522	-0.469569	0.741205	0.168653	0.416859	0.672107	0.265902	0.0859376	-0.290035	-0.0502292	0.219297	0.310114	-0.12184	0.060826	0.264906	0.451909	-0.412363	-0.485344	-0.396946	0.041307	0.159568	-0.762017	-0.713988	0.179127	-0.311081	-0.131818	-0.155523	-0.155818	-0.288358	-0.344583	-0.0729387	-0.0479174	0.428082	0.0526212	0.158838	0.536303	-0.239756	-0.192072	0.61884	0.736336	0.314684	-0.259644
mz_113	-0.123911	-0.103275	-0.198379	0.0787404	0.234567	-0.0896862	-0.702338	-0.411872	-0.187024	-0.110634	-0.413862	-0.716034	-0.0983679	0.145754	0.31149	0.627304	0.617482	0.690728	-0.0304738	0.800657	0.723712	0.165586	0.397392	0.893237	0.922862	0.796948	-0.597225	-0.693851	0.103811	0.147715	-0.290365	0.829207	0.834082	0.839362	0.871768	0.879102	0.912544	0.772479	0.522444	-0.261841	-0.704274	-0.794532	-0.862429	0.528705	-0.0280758	0.25459	-0.343061	0.40782	0.785447
mz_114	0.329632	0.226113	0.224343	0.140556	-0.355345	0.264293	-0.42291	-0.0715126	-0.246536	0.062874	-0.161769	-0.213846	0.298525	-0.317945	0.0259861	0.00284026	0.110863	0.151276	0.215145	0.362796	0.369005	0.714726	0.588206	0.526493	0.62423	0.373737	-0.281169	-0.594075	-0.165826	-0.271467	-0.327685	0.704155	0.36602	0.31698	0.450259	0.505215	0.464335	0.417285	0.400904	-0.684648	-0.553508	-0.560494	-0.565843	0.387309	-0.492062	0.159776	-0.213286	0.0238737	0.67478
mz_115	0.0538902	0.0270937	-0.0913706	0.2272	0.00347672	0.0747971	-0.575228	-0.32111	-0.22497	-0.0656851	-0.355499	-0.593919	0.0457662	-0.0903163	0.209807	0.413217	0.462769	0.488596	0.128467	0.736526	0.664403	0.452848	0.504006	0.853811	0.91071	0.643992	-0.46649	-0.702218	0.0374325	0.0251255	-0.245822	0.864501	0.693348	0.709655	0.813671	0.834982	0.831539	0.732677	0.589907	-0.546374	-0.689805	-0.776701	-0.766665	0.59027	-0.251468	0.154678	-0.372816	0.211289	0.807722
mz_116	0.363448	0.3474	0.570219	-0.362119	-0.494472	0.315922	-0.432464	0.0675344	-0.490943	0.479306	-0.150313	-0.159069	0.407534	-0.0269587	0.095114	0.123748	0.260642	0.370789	0.153673	0.4075	0.468175	0.355911	0.559103	0.286914	0.282132	0.112155	-0.237302	-0.264726	-0.181371	-0.235056	0.175353	0.39217	0.362466	0.28186	0.390406	0.311362	0.310797	0.307758	0.0839644	0.00294956	-0.350125	-0.413442	-0.319571	0.241898	-0.275511	0.474797	0.286266	0.236648	0.217725
mz_117	-0.286425	-0.391134	-0.298543	0.0776192	0.337673	-0.467842	0.573681	-0.0293195	0.321995	-0.223766	0.112122	0.325172	-0.43657	-0.0662984	-0.304063	-0.514124	-0.288687	-0.470685	-0.077442	-0.690172	-0.643143	-0.44345	-0.667118	-0.733079	-0.75017	-0.705861	0.416025	0.703209	0.290278	0.323214	0.450434	-0.859268	-0.699975	-0.651317	-0.705847	-0.723627	-0.725758	-0.725111	-0.480518	0.490891	0.920416	0.878286	0.696899	-0.477863	0.437823	-0.550364	0.12366	-0.338782	-0.737528
mz_118	0.164185	0.131753	0.187898	-0.0571599	-0.191953	0.00249552	0.633981	0.340038	0.00912514	0.203509	0.281929	0.644199	0.142658	-0.335021	-0.455357	-0.761249	-0.533232	-0.591032	-0.224488	-0.725827	-0.650438	-0.193379	-0.28973	-0.788491	-0.775785	-0.68911	0.559192	0.423249	-0.162904	-0.164461	0.407577	-0.781026	-0.812574	-0.827941	-0.756116	-0.823123	-0.792403	-0.745048	-0.495183	0.289232	0.794699	0.833262	0.759874	-0.642034	-0.0378011	-0.255353	0.376367	-0.570553	-0.828683
mz_119	0.22044	0.314939	0.381223	-0.0963893	-0.443858	0.279071	0.617406	0.600636	0.0611705	0.367206	0.514139	0.900144	0.390192	-0.336003	-0.376474	-0.654473	-0.694464	-0.674354	-0.0387898	-0.752985	-0.696094	-0.0947233	-0.298173	-0.863139	-0.865641	-0.749633	0.433349	0.35325	-0.39945	-0.473146	0.0572992	-0.787814	-0.805883	-0.836405	-0.813206	-0.838116	-0.877181	-0.74712	-0.547795	0.251679	0.574402	0.697434	0.766827	-0.521507	-0.344887	-0.089546	0.369478	-0.440787	-0.681877
mz_120	0.0586401	0.014122	0.0829865	-0.123218	-0.0530204	-0.015585	0.54321	0.108041	-0.0879947	0.0959217	0.0537059	0.403401	-0.0148928	0.106426	-0.105064	-0.445483	-0.336639	-0.248847	0.179535	-0.597022	-0.444728	-0.145763	-0.143741	-0.723688	-0.717091	-0.553249	0.738576	0.470282	-0.15891	-0.0581732	0.451153	-0.698271	-0.615206	-0.579815	-0.610493	-0.708215	-0.670894	-0.587752	-0.160736	0.212538	0.692617	0.731249	0.756384	-0.554579	0.187737	-0.185413	0.414373	-0.150652	-0.631625
mz_121	-0.753957	-0.752866	-0.497568	-0.0927597	0.713623	-0.80596	-0.100108	-0.656556	0.385325	-0.728358	-0.372377	-0.627744	-0.849466	0.228078	0.0896667	0.525196	0.31559	0.0565159	-0.28763	0.21452	0.0704086	-0.535933	-0.467256	0.43887	0.431411	0.514727	-0.0641069	0.0365419	0.901916	0.92581	0.0385024	0.256891	0.250071	0.330599	0.245514	0.339011	0.430052	0.17145	0.00696904	-0.0126815	-0.0148762	-0.145429	-0.474924	0.219373	0.526343	-0.583865	-0.675091	-0.0481707	0.143109
mz_122	-0.42817	-0.458893	-0.16033	-0.101482	0.288063	-0.514112	0.693207	0.0357934	0.360543	-0.285658	0.181301	0.322792	-0.44185	-0.0837083	-0.293269	-0.242568	-0.368696	-0.445028	-0.170723	-0.607562	-0.633806	-0.647092	-0.717875	-0.641234	-0.623533	-0.461253	0.519496	0.506223	0.314794	0.390001	0.334292	-0.756958	-0.628462	-0.595794	-0.646871	-0.702597	-0.612509	-0.736406	-0.286592	0.232425	0.845346	0.747979	0.502093	-0.583323	0.362721	-0.521222	-0.00335269	-0.359111	-0.659536
mz_123	-0.597374	-0.690258	-0.709021	0.27879	0.750926	-0.743318	0.558777	-0.225622	0.691678	-0.730564	0.105987	-0.00139763	-0.775084	-0.0249285	-0.21825	-0.189479	-0.163781	-0.50645	-0.407038	-0.503567	-0.566086	-0.593319	-0.872131	-0.346272	-0.359358	-0.23901	0.285523	0.54438	0.613438	0.665057	0.156345	-0.527729	-0.453585	-0.39583	-0.511772	-0.431645	-0.394809	-0.459059	-0.323658	0.203388	0.651321	0.619608	0.345146	-0.276599	0.657128	-0.730694	-0.289055	-0.400091	-0.4935
mz_124	-0.515525	-0.671333	-0.5061	0.215304	0.529805	-0.696693	0.667047	-0.135844	0.603517	-0.613866	0.142717	0.202204	-0.674797	-0.0887816	-0.144434	-0.308133	-0.330378	-0.576656	-0.151205	-0.679553	-0.667478	-0.444259	-0.867869	-0.600428	-0.576373	-0.503579	0.467443	0.565353	0.466646	0.512337	0.13458	-0.704529	-0.595174	-0.571007	-0.697462	-0.638745	-0.638339	-0.671601	-0.349171	0.128964	0.789806	0.764205	0.498209	-0.364889	0.544339	-0.682278	-0.123173	-0.340381	-0.540642
mz_125	0.483567	0.574701	0.105281	0.157512	-0.248038	0.49793	-0.139391	0.175605	-0.417005	0.535215	-0.0309135	0.0820395	0.490687	-0.0780886	-0.0521945	-0.351392	0.14489	0.0965144	-0.101079	0.146018	0.232196	0.328962	0.42327	0.0112755	-0.0634643	-0.212458	-0.0317697	-0.0434069	-0.423476	-0.426151	0.351217	-0.0206088	-0.0143323	0.0102744	0.130337	0.0707867	0.00890241	0.255364	-0.173733	0.363569	-0.0916902	0.0301706	0.338574	0.158736	-0.215001	0.291068	0.457373	-0.101981	-0.230961
mz_126	-0.160694	-0.0496739	-0.159201	-0.0103212	0.20511	0.0531233	-0.659393	-0.310389	-0.161983	-0.046341	-0.32122	-0.77332	-0.0568512	0.410666	0.52847	0.87133	0.775862	0.81221	0.155071	0.918166	0.899143	0.20743	0.407405	0.882261	0.842006	0.722951	-0.559717	-0.557482	0.0413116	0.11305	-0.174377	0.827465	0.963739	0.974087	0.924462	0.898774	0.906184	0.919538	0.572444	-0.13236	-0.831241	-0.898833	-0.739732	0.760234	0.087745	0.430621	-0.125264	0.682925	0.775752
mz_127	-0.259127	-0.194652	-0.122114	-0.0964622	0.205295	-0.0598594	-0.638501	-0.226267	-0.00222962	-0.169991	-0.187076	-0.624288	-0.0989702	0.192419	0.35648	0.707767	0.616609	0.711873	0.190775	0.683602	0.691354	0.253348	0.354258	0.711305	0.741829	0.616138	-0.48449	-0.536862	-0.0610582	-0.0176455	-0.346662	0.695402	0.831236	0.793771	0.724604	0.739515	0.733088	0.722675	0.506899	-0.189264	-0.764423	-0.741217	-0.744072	0.678462	0.0216134	0.381915	-0.0689274	0.676403	0.856403
mz_128	-0.0165039	0.0668999	-0.153828	0.0669508	0.158684	0.106366	-0.749423	-0.351031	-0.23326	0.0112193	-0.383981	-0.744123	0.0032435	0.254695	0.370001	0.705035	0.667117	0.708101	-0.0419909	0.940575	0.824278	0.140337	0.46482	0.957817	0.913057	0.767439	-0.623556	-0.519567	0.12425	0.147797	-0.159926	0.866245	0.89373	0.927507	0.958024	0.977578	0.978706	0.931813	0.43673	-0.11362	-0.850411	-0.894475	-0.767729	0.666845	-0.0108424	0.357208	-0.283635	0.421865	0.700484
mz_129	0.0323229	0.112938	0.29881	-0.572986	-0.0808932	0.0878147	-0.217439	0.132893	-0.0111574	0.138591	0.101817	-0.0594901	0.0589016	-0.0420257	-0.549038	-0.225857	0.192762	0.0824048	-0.0560327	-0.0586609	-0.00982643	-0.0454495	0.282771	-0.0402759	-0.0928563	-0.0929962	-0.0416039	0.475529	0.0413338	-0.0541005	0.564382	-0.0378817	-0.0879293	-0.0962449	-0.0379982	-0.063844	-0.0189206	0.00324185	-0.270212	0.517574	0.0256245	0.100306	0.055458	0.054698	0.0792799	0.0294851	0.330267	-0.00445601	-0.147588
mz_130	0.23144	0.0349504	0.200163	-0.0253072	-0.249202	0.0527887	0.36466	0.0227369	-0.254939	0.125352	-0.085138	0.227183	0.0782606	0.0265208	0.138223	-0.392987	-0.195895	-0.0928471	0.465923	-0.388078	-0.15306	0.342728	0.129055	-0.531641	-0.478176	-0.54341	0.686326	0.229124	-0.229213	-0.144597	0.38818	-0.396773	-0.365929	-0.386503	-0.391293	-0.487973	-0.508838	-0.378732	0.0733251	-0.132453	0.46948	0.474809	0.552789	-0.263097	0.0883022	-0.0173277	0.496556	0.0364176	-0.315348
mz_131	-0.298769	-0.255414	-0.161473	0.0271555	0.192073	-0.372737	0.672453	0.0919367	0.428376	-0.273577	0.254635	0.592249	-0.284927	-0.230105	-0.305672	-0.462252	-0.709305	-0.851838	-0.4707	-0.805368	-0.894003	-0.619672	-0.801279	-0.700299	-0.698904	-0.433945	0.552068	0.469238	0.270331	0.231436	-0.0656836	-0.791698	-0.82311	-0.786114	-0.844814	-0.733434	-0.727286	-0.773209	-0.72548	0.247034	0.682565	0.815713	0.604506	-0.584329	0.101372	-0.628631	-0.197652	-0.694674	-0.772829
mz_132	0.0577118	0.0178983	0.303225	-0.149279	-0.303575	-0.0915026	0.46296	0.108107	-0.0633814	0.166111	0.0635334	0.639492	0.0443858	-0.421104	-0.362534	-0.714192	-0.672884	-0.673162	0.00125074	-0.714864	-0.705811	-0.163607	-0.307094	-0.751266	-0.711767	-0.729519	0.669545	0.442077	0.0348027	-0.0534036	0.288817	-0.756336	-0.840535	-0.805974	-0.729395	-0.692422	-0.739123	-0.751253	-0.660641	0.225066	0.687347	0.802577	0.681027	-0.472776	-0.22918	-0.468665	0.107368	-0.621887	-0.699873
mz_133	0.259607	0.383425	0.341284	0.0130532	-0.457402	0.356437	0.681259	0.574032	-0.0262897	0.383307	0.456802	0.888238	0.444779	-0.343535	-0.229695	-0.542737	-0.787314	-0.655543	-0.148792	-0.625985	-0.645978	-0.193698	-0.26927	-0.780428	-0.781578	-0.643173	0.623079	0.248482	-0.439082	-0.450338	0.0078843	-0.755201	-0.762712	-0.763008	-0.72182	-0.74391	-0.770795	-0.63698	-0.460281	0.104883	0.465204	0.643902	0.803941	-0.554874	-0.387491	-0.0409587	0.313018	-0.53348	-0.719281
mz_134	0.352529	0.276151	0.456883	-0.0983069	-0.534815	0.316785	0.545254	0.490218	-0.141613	0.372123	0.340698	0.767927	0.401411	-0.149014	0.00517882	-0.447752	-0.671756	-0.373872	0.258247	-0.602024	-0.503134	0.0328474	-0.0867827	-0.829501	-0.788372	-0.693418	0.619858	0.287453	-0.493803	-0.460522	0.000774911	-0.687927	-0.598125	-0.664539	-0.681592	-0.748703	-0.788162	-0.669357	-0.196718	-0.0446522	0.469206	0.568421	0.694128	-0.5981	-0.221332	0.18499	0.502229	-0.120478	-0.50714
mz_135	-0.563701	-0.740083	-0.536794	0.223036	0.567675	-0.769245	0.570257	-0.256015	0.575981	-0.661503	0.0336628	0.12419	-0.739848	-0.0681971	-0.0589149	-0.234013	-0.304719	-0.522702	-0.123467	-0.61908	-0.622614	-0.443197	-0.863292	-0.520577	-0.483127	-0.426203	0.441253	0.492611	0.533187	0.577846	0.0540576	-0.635527	-0.520851	-0.490256	-0.624056	-0.541195	-0.55131	-0.620155	-0.333424	0.0861519	0.72653	0.702709	0.396512	-0.315791	0.542673	-0.70822	-0.221576	-0.301236	-0.447637
mz_136	-0.0155195	-0.103839	0.0910602	-0.122538	-0.0669327	-0.0945565	0.55943	0.277738	0.199221	0.0131379	0.309702	0.519379	-0.0663671	-0.0649585	-0.308887	-0.604495	-0.334786	-0.433323	0.270419	-0.780376	-0.583151	-0.00101169	-0.325247	-0.862459	-0.857072	-0.810669	0.466555	0.640058	-0.119098	-0.130977	0.380774	-0.785338	-0.702682	-0.725682	-0.788455	-0.84451	-0.871347	-0.743578	-0.34158	0.323639	0.7767	0.791693	0.744989	-0.414407	0.181474	-0.250671	0.462143	-0.113375	-0.575624
mz_137	-0.46975	-0.584982	-0.429967	0.179455	0.454813	-0.649057	0.669752	-0.070606	0.610272	-0.571531	0.19829	0.342554	-0.589039	-0.223218	-0.302741	-0.443269	-0.482449	-0.725969	-0.2835	-0.784883	-0.809896	-0.48244	-0.869818	-0.639622	-0.602786	-0.478689	0.462847	0.531842	0.430614	0.427341	0.0355883	-0.732394	-0.717412	-0.693624	-0.785436	-0.692255	-0.687331	-0.754931	-0.484218	0.129767	0.794672	0.818008	0.497264	-0.462383	0.38462	-0.745406	-0.206728	-0.520945	-0.586908
mz_138	-0.795723	-0.826568	-0.6005	-0.00829834	0.797259	-0.869449	0.0138237	-0.61922	0.501952	-0.812509	-0.293437	-0.619015	-0.920935	0.199043	0.0429861	0.461952	0.327771	-0.00699351	-0.306597	0.14316	0.0190267	-0.534367	-0.569355	0.36918	0.358138	0.415482	-0.0534819	0.124688	0.928892	0.963547	0.10099	0.179181	0.192898	0.265957	0.167237	0.252006	0.341779	0.111822	0.0076097	0.00185635	0.0926655	-0.0594584	-0.394619	0.21185	0.631183	-0.636665	-0.626659	-0.0715213	0.0799895
mz_139	0.433517	0.599149	0.582317	-0.313323	-0.557826	0.470449	0.235341	0.500478	-0.172577	0.535524	0.334683	0.782522	0.554643	-0.0912525	-0.391783	-0.411928	-0.67434	-0.506742	-0.283552	-0.486655	-0.57613	-0.324335	-0.0374856	-0.485275	-0.523045	-0.146579	0.0496802	0.16597	-0.273611	-0.400823	-0.180418	-0.373682	-0.571513	-0.587869	-0.514067	-0.510887	-0.46873	-0.547084	-0.497789	0.207578	0.244848	0.292459	0.311169	-0.725617	-0.493729	0.0697878	-0.0288021	-0.465594	-0.518706
mz_140	0.778768	0.839282	0.625101	-0.160317	-0.752468	0.839208	-0.20633	0.291961	-0.598542	0.734797	-0.0121209	0.33097	0.754767	0.133589	0.00750633	-0.316862	-0.137633	0.0238739	0.412992	-0.00712256	0.107941	0.537318	0.683195	-0.122447	-0.181793	-0.168513	0.000682772	0.0493277	-0.508364	-0.620317	0.11845	0.0958329	-0.105401	-0.0962448	-0.000110442	-0.0364886	-0.112757	0.066232	-0.0523746	0.0457165	-0.198853	-0.120039	0.253052	-0.0408836	-0.517108	0.396211	0.320833	0.0574876	-0.0485667
mz_141	0.204512	0.104172	0.157141	-0.341187	-0.0114174	-0.0337906	0.122024	0.0864068	0.0673576	0.0485971	0.0983175	0.224775	-0.0526758	0.177233	-0.392202	-0.482681	-0.175402	-0.324029	-0.230605	-0.502388	-0.436299	-0.254633	-0.0975631	-0.435944	-0.515166	-0.266769	0.0811633	0.737196	0.232842	0.147027	0.407248	-0.367122	-0.456859	-0.485891	-0.502026	-0.485994	-0.447504	-0.459171	-0.533729	0.512202	0.468873	0.460145	0.355609	-0.51111	0.332922	-0.140726	0.182896	-0.238001	-0.600807
mz_142	0.159355	0.156496	0.0821694	-0.106402	-0.0403915	0.142246	-0.823386	-0.417421	-0.479155	0.24939	-0.539629	-0.584777	0.0698996	0.407242	0.503002	0.597992	0.513101	0.702655	0.119945	0.800586	0.709747	0.0609371	0.475819	0.708295	0.644581	0.542871	-0.541338	-0.304796	0.157139	0.15916	-0.0887823	0.646476	0.754916	0.782861	0.800159	0.818302	0.779048	0.705402	0.191742	0.110743	-0.67383	-0.730947	-0.604371	0.424731	-0.00315149	0.424932	-0.196251	0.477886	0.48519
mz_143	0.0685083	0.0135358	0.0176905	0.0305009	-0.0510694	-0.116004	0.418081	0.00586432	0.0944549	-0.0628398	0.0458167	0.422937	-0.0597366	-0.0661961	-0.208631	-0.663213	-0.37461	-0.656369	-0.00561387	-0.740092	-0.565734	0.144861	-0.273521	-0.58814	-0.585415	-0.45806	0.403634	0.313537	0.0737407	-0.0244212	0.127212	-0.469395	-0.67896	-0.669716	-0.690931	-0.629702	-0.669712	-0.57878	-0.515273	0.133202	0.588181	0.643953	0.5484	-0.300393	-0.000646206	-0.493532	0.052445	-0.428983	-0.523619
mz_144	-0.359181	-0.395437	-0.248818	0.0198168	0.327235	-0.335161	-0.523542	-0.57021	0.00533145	-0.394025	-0.461595	-0.807305	-0.40632	0.265665	0.376917	0.736433	0.615139	0.541577	0.205986	0.685064	0.634852	0.156597	0.173279	0.831058	0.861415	0.730572	-0.442439	-0.496121	0.447215	0.464886	-0.195235	0.810062	0.755877	0.785485	0.754194	0.784879	0.820367	0.641157	0.566381	-0.418329	-0.552042	-0.739303	-0.858089	0.607082	0.152559	-0.0528145	-0.527086	0.42716	0.789997
mz_145	-0.443205	-0.432481	-0.270426	-0.132804	0.422538	-0.474092	0.616134	0.0874599	0.39582	-0.292021	0.237288	0.227367	-0.420675	-0.030542	-0.315169	-0.311753	-0.15379	-0.307065	-0.22685	-0.597233	-0.512443	-0.510579	-0.589383	-0.647146	-0.65285	-0.510946	0.545973	0.568585	0.135302	0.245749	0.479633	-0.782306	-0.5569	-0.54418	-0.630379	-0.698776	-0.623685	-0.586163	-0.333287	0.476111	0.774393	0.803338	0.625128	-0.403638	0.507976	-0.384121	0.340059	-0.206289	-0.674251
mz_146	-0.0105699	-0.283796	0.11722	-0.14129	-0.0652809	-0.247227	0.469744	0.213084	0.357731	-0.217578	0.322448	0.456352	-0.207287	-0.0638514	-0.20327	-0.4349	-0.476692	-0.470354	0.208047	-0.752285	-0.655454	-0.108294	-0.424907	-0.757962	-0.715185	-0.616213	0.316545	0.672587	0.12065	0.0780838	0.0381182	-0.613067	-0.573737	-0.669654	-0.775939	-0.754045	-0.776954	-0.80053	-0.273055	0.0144371	0.649795	0.609824	0.414488	-0.561398	0.293577	-0.192353	0.192394	-0.0688652	-0.39366
mz_147	0.279112	0.247873	0.370112	-0.0743896	-0.436534	0.218368	0.663822	0.546383	0.00872245	0.335931	0.448816	0.864913	0.325641	-0.390659	-0.421839	-0.765153	-0.720446	-0.629387	0.0317713	-0.785037	-0.725012	-0.0988485	-0.247331	-0.936533	-0.914429	-0.866169	0.581998	0.499051	-0.359004	-0.392304	0.250054	-0.870017	-0.865935	-0.897059	-0.844552	-0.899585	-0.925981	-0.828608	-0.463967	0.201128	0.720999	0.812599	0.845632	-0.654314	-0.224289	-0.106348	0.451559	-0.465242	-0.751049
mz_148	0.189399	0.0710277	0.138546	-0.260967	-0.0472298	0.018186	0.336593	0.192646	-0.0230087	0.154059	0.147973	0.376138	0.00702516	0.186122	-0.218013	-0.519934	-0.241159	-0.196058	0.0613934	-0.604081	-0.446975	-0.195361	-0.105234	-0.738156	-0.784086	-0.603428	0.430938	0.760171	-0.0939684	-0.0533842	0.508855	-0.69521	-0.554221	-0.579175	-0.633734	-0.70543	-0.691519	-0.588588	-0.3763	0.528067	0.654782	0.698551	0.702901	-0.590756	0.364526	0.000175621	0.553931	-0.0410182	-0.690957
mz_149	0.287853	0.238074	0.294437	0.0801603	-0.430113	0.243586	0.650704	0.579395	0.103233	0.272027	0.514498	0.91998	0.342766	-0.393352	-0.318159	-0.706546	-0.793863	-0.676612	0.0611062	-0.793873	-0.755072	-0.0381892	-0.315771	-0.909711	-0.873478	-0.80901	0.450478	0.384136	-0.407048	-0.456758	-0.0602415	-0.810533	-0.815823	-0.864458	-0.849068	-0.859844	-0.920821	-0.819409	-0.411273	0.0497788	0.618274	0.720088	0.757103	-0.634104	-0.290815	-0.0694818	0.323836	-0.413762	-0.604871
mz_150	-0.62717	-0.797042	-0.659025	0.299831	0.688755	-0.852722	0.477907	-0.337332	0.607619	-0.721414	-0.0194948	-0.00994881	-0.812894	-0.133012	-0.146833	-0.234776	-0.1643	-0.469927	-0.210835	-0.520479	-0.542444	-0.430013	-0.85726	-0.367561	-0.328056	-0.333271	0.277964	0.405062	0.610488	0.645104	0.0898623	-0.52624	-0.439343	-0.395567	-0.497085	-0.412936	-0.412846	-0.515215	-0.30177	0.112957	0.697161	0.633743	0.269892	-0.211819	0.558601	-0.780612	-0.313645	-0.339658	-0.363955
mz_151	-0.690595	-0.814638	-0.637136	0.211234	0.723479	-0.885555	0.434503	-0.33008	0.719034	-0.822222	0.0321851	-0.100403	-0.851113	-0.0987942	-0.186404	-0.0617247	-0.130525	-0.505882	-0.40577	-0.420845	-0.508644	-0.542912	-0.899078	-0.178383	-0.154362	-0.0683606	0.122096	0.336455	0.763666	0.763685	-0.0273345	-0.321707	-0.325717	-0.299065	-0.405652	-0.293072	-0.249229	-0.42284	-0.290585	0.0228079	0.543006	0.442271	0.0332892	-0.178336	0.567748	-0.789656	-0.504988	-0.389484	-0.283823
mz_152	-0.745948	-0.894116	-0.711654	0.229444	0.804129	-0.94248	0.354756	-0.45226	0.662979	-0.852928	-0.0901914	-0.247782	-0.935251	-0.037385	-0.0919405	0.0352752	-0.00998986	-0.342716	-0.314869	-0.296659	-0.384256	-0.544101	-0.846816	-0.0985403	-0.0730143	-0.0494485	0.15229	0.340022	0.803124	0.844618	0.0643579	-0.285792	-0.217456	-0.168988	-0.280278	-0.183135	-0.143257	-0.317294	-0.19028	0.0404665	0.506999	0.399423	0.00634324	-0.0922065	0.657819	-0.772238	-0.483989	-0.27871	-0.216537
mz_153	0.569386	0.682988	0.408049	0.034908	-0.515544	0.56762	0.134079	0.538528	-0.195528	0.49612	0.355483	0.583671	0.682886	-0.336366	-0.378378	-0.406189	-0.486414	-0.355321	-0.446892	-0.18968	-0.287291	-0.0155064	0.18796	-0.139002	-0.134381	0.0642386	-0.143106	-0.242994	-0.461172	-0.547071	-0.293874	-0.0304653	-0.296505	-0.350381	-0.197645	-0.212695	-0.165965	-0.205264	-0.176547	-0.117142	-0.022392	0.0191203	0.0752957	-0.500924	-0.588684	0.24534	-0.00281392	-0.490868	-0.234584
mz_154	0.594365	0.672168	0.663439	-0.179488	-0.754834	0.618022	0.363036	0.63968	-0.288452	0.67496	0.400037	0.944175	0.725594	-0.261099	-0.301535	-0.645599	-0.750406	-0.499254	0.0418119	-0.601951	-0.564269	0.0457443	0.0979751	-0.735679	-0.730365	-0.553148	0.324628	0.177999	-0.612411	-0.702125	-0.0787471	-0.571307	-0.681815	-0.72604	-0.642591	-0.680958	-0.714705	-0.627467	-0.420815	0.120512	0.343637	0.472998	0.616841	-0.652435	-0.593712	0.202143	0.364779	-0.367672	-0.539217
mz_155	0.712063	0.709395	0.526223	-0.0423616	-0.668433	0.661439	0.0396786	0.562072	-0.296513	0.649605	0.332344	0.727386	0.744858	-0.242408	-0.259964	-0.692983	-0.475457	-0.314382	0.0725473	-0.442683	-0.33636	0.364905	0.313043	-0.520893	-0.524654	-0.47496	-0.00312651	0.111317	-0.667906	-0.792745	-0.13903	-0.328777	-0.440442	-0.519776	-0.441609	-0.441024	-0.535192	-0.362745	-0.383688	0.181958	0.117981	0.282777	0.445281	-0.377425	-0.527559	0.352797	0.449371	-0.177393	-0.290808
mz_156	0.5539	0.57787	0.248789	0.297374	-0.467914	0.526952	0.178069	0.536035	-0.101102	0.425786	0.392691	0.628513	0.630701	-0.304366	-0.106178	-0.352701	-0.523774	-0.363918	-0.278212	-0.213708	-0.285233	0.100899	0.0315937	-0.226915	-0.213739	-0.102346	-0.197394	-0.267369	-0.518017	-0.582512	-0.529097	-0.111238	-0.246678	-0.324115	-0.246067	-0.230647	-0.268069	-0.228638	-0.140864	-0.197491	-0.0293943	0.0214916	0.136385	-0.415819	-0.52943	0.314197	0.0178531	-0.324134	-0.149139
mz_157	-0.263095	-0.211093	-0.2935	-0.0261741	0.392126	-0.256724	-0.153948	-0.326974	0.132324	-0.346326	-0.21057	-0.556312	-0.335974	0.155419	-0.19891	0.112846	0.565328	0.160081	-0.046395	0.210996	0.299574	0.184247	0.130924	0.455983	0.436643	0.413332	-0.227587	-0.114641	0.35299	0.332347	0.330922	0.455065	0.237085	0.290901	0.316206	0.293918	0.385449	0.339419	0.256703	-0.0459479	-0.0724117	-0.222965	-0.337118	0.386835	0.247213	-0.330735	-0.21151	0.0260928	0.254683
mz_158	0.197763	0.23877	0.515892	-0.559816	-0.355731	0.152048	0.267162	0.223782	-0.204786	0.383794	0.0977218	0.455122	0.179805	0.130281	-0.350844	-0.498621	-0.251038	-0.270747	0.215845	-0.575747	-0.409674	-0.0904423	0.0247037	-0.678723	-0.729527	-0.55654	0.39952	0.610005	-0.0785236	-0.146066	0.588429	-0.573392	-0.60308	-0.597226	-0.581768	-0.670245	-0.640931	-0.592107	-0.460626	0.524962	0.595206	0.587255	0.598851	-0.45395	-0.00542241	-0.109753	0.43944	-0.131034	-0.636823
mz_159	0.0223096	-0.0183036	-0.0563727	-0.0723096	0.0947555	-0.0287137	0.411825	0.192853	0.0200315	0.0877091	0.16629	0.217283	-0.0233576	0.116347	-0.135651	-0.424766	0.0274153	-0.0563318	0.137595	-0.454255	-0.205686	0.0397559	-0.0875559	-0.608128	-0.634467	-0.599887	0.437975	0.456906	-0.252988	-0.145418	0.577179	-0.602948	-0.401106	-0.416649	-0.470179	-0.604622	-0.588738	-0.379385	-0.134678	0.439638	0.59986	0.626828	0.695248	-0.253443	0.352341	-0.00155071	0.697797	0.0779558	-0.527648
mz_160	0.093789	0.141485	0.228528	-0.316495	-0.131115	0.0977235	0.507214	0.391095	0.0257069	0.267771	0.329455	0.543718	0.124146	0.0928063	-0.263965	-0.468318	-0.312981	-0.305949	-0.0229358	-0.629027	-0.489685	-0.28997	-0.234542	-0.821683	-0.885269	-0.688102	0.493202	0.674349	-0.219222	-0.181268	0.500074	-0.815076	-0.632043	-0.650109	-0.701075	-0.800299	-0.77904	-0.625063	-0.47362	0.613517	0.663879	0.739691	0.817425	-0.529289	0.200487	0.00794824	0.627543	-0.120961	-0.801383
mz_161	0.417156	0.480118	0.541262	-0.251981	-0.562291	0.422052	0.443425	0.603596	-0.161175	0.517809	0.423825	0.842386	0.547035	-0.344557	-0.441003	-0.753561	-0.629661	-0.495749	-0.0405932	-0.683092	-0.583357	0.0228887	0.0393178	-0.810894	-0.799541	-0.686056	0.5065	0.344605	-0.55515	-0.610489	0.206574	-0.702998	-0.746567	-0.796327	-0.721753	-0.776548	-0.792759	-0.651441	-0.497233	0.288016	0.485804	0.66926	0.749465	-0.571637	-0.377588	0.0940122	0.577073	-0.391679	-0.660346
mz_162	0.161603	0.125329	0.00409926	0.0536523	-0.0599306	0.106582	0.630195	0.397776	0.0864726	0.172057	0.360566	0.616035	0.121051	-0.0977887	-0.318277	-0.67986	-0.421265	-0.40197	0.0123561	-0.718573	-0.58516	-0.14295	-0.253638	-0.872862	-0.889805	-0.785088	0.547408	0.599555	-0.333128	-0.267858	0.403225	-0.874076	-0.73908	-0.738408	-0.757548	-0.844626	-0.851354	-0.675098	-0.328882	0.395379	0.757401	0.846688	0.919048	-0.591029	0.149499	-0.0926279	0.568268	-0.251195	-0.753682
mz_163	-0.0420892	-0.0456522	-0.00726983	-0.0330846	0.0139359	-0.108083	0.522572	0.316529	0.213792	0.0752857	0.346917	0.651213	-0.00999473	-0.268674	-0.401407	-0.679862	-0.5113	-0.534489	-0.165502	-0.776246	-0.718657	-0.312705	-0.458249	-0.860487	-0.8608	-0.774672	0.453043	0.575485	-0.165827	-0.171404	0.224011	-0.925417	-0.7765	-0.782877	-0.808348	-0.80857	-0.844717	-0.742935	-0.628945	0.530588	0.73259	0.886818	0.796409	-0.532088	0.075776	-0.248758	0.381317	-0.375458	-0.743801
mz_164	-0.552531	-0.660062	-0.434017	0.116646	0.503669	-0.720847	0.713666	-0.126691	0.565347	-0.576054	0.13458	0.16668	-0.668918	-0.182615	-0.286434	-0.351569	-0.276133	-0.600918	-0.231433	-0.652027	-0.639416	-0.46786	-0.840307	-0.567518	-0.546659	-0.510218	0.531718	0.556511	0.513969	0.552896	0.350676	-0.695404	-0.6341	-0.598075	-0.670815	-0.646922	-0.609009	-0.661081	-0.379	0.17573	0.848761	0.794641	0.509406	-0.327063	0.512263	-0.760146	-0.0850616	-0.462787	-0.62503
mz_165	0.608264	0.616667	0.598109	-0.10711	-0.717496	0.575795	0.346376	0.625193	-0.227114	0.604167	0.413576	0.950031	0.678716	-0.343817	-0.352934	-0.748159	-0.785513	-0.535449	0.0560632	-0.656807	-0.622349	0.09028	0.0870159	-0.770703	-0.750088	-0.627068	0.322727	0.259922	-0.59632	-0.697843	-0.0941824	-0.607477	-0.719035	-0.771398	-0.6873	-0.697628	-0.756563	-0.663108	-0.444949	0.105212	0.371433	0.528954	0.638232	-0.660315	-0.555033	0.169276	0.367831	-0.391001	-0.521819
mz_166	0.0139912	-0.227967	-0.0180587	0.167296	-0.0605012	-0.263475	0.541904	0.18316	0.367506	-0.262201	0.302636	0.548162	-0.138002	-0.450086	-0.343221	-0.726329	-0.603465	-0.741752	-0.0101959	-0.830914	-0.747939	0.0972948	-0.44709	-0.697319	-0.6049	-0.61957	0.374694	0.361889	0.0446794	-0.0439831	-0.101492	-0.574377	-0.716581	-0.790823	-0.806821	-0.724777	-0.779324	-0.777806	-0.383266	-0.164498	0.651822	0.69393	0.443811	-0.45325	0.0109249	-0.432995	0.038652	-0.45886	-0.390417
mz_167	0.674617	0.798407	0.700235	-0.107631	-0.843036	0.781229	0.19175	0.704486	-0.344369	0.729839	0.428516	0.839141	0.894217	-0.401929	-0.289713	-0.535372	-0.646288	-0.362855	0.00058593	-0.343444	-0.339266	0.238555	0.323014	-0.455927	-0.430855	-0.348618	0.169743	-0.113269	-0.771133	-0.870661	-0.225003	-0.280417	-0.447765	-0.509416	-0.377536	-0.408569	-0.448959	-0.340021	-0.240815	-0.0716467	0.0117435	0.183995	0.388686	-0.421062	-0.793201	0.376767	0.349796	-0.325588	-0.263138
mz_168	0.634616	0.818245	0.591366	-0.033034	-0.72765	0.72932	-0.0186216	0.530908	-0.421924	0.717901	0.255042	0.585954	0.859418	-0.427749	-0.279349	-0.385364	-0.444422	-0.248128	-0.256844	-0.0412812	-0.118344	0.183914	0.391574	-0.0832819	-0.0758199	-0.0331513	-0.0601199	-0.365924	-0.619209	-0.727416	-0.232824	0.012535	-0.219775	-0.252217	-0.0591096	-0.0747583	-0.088041	-0.0472904	-0.217563	-0.0689686	-0.195961	-0.0634578	0.11229	-0.239509	-0.832637	0.342917	0.12684	-0.423903	-0.146137
mz_169	0.224293	0.313179	0.140107	0.156397	-0.263767	0.192283	0.43741	0.338583	0.0587136	0.167477	0.300272	0.488648	0.285472	-0.559122	-0.533574	-0.66718	-0.434478	-0.688963	-0.397315	-0.406634	-0.438161	0.0605243	-0.130255	-0.308312	-0.311013	-0.353766	0.255087	0.0881056	-0.110126	-0.227024	0.187652	-0.29571	-0.589306	-0.573555	-0.417983	-0.391155	-0.395724	-0.324584	-0.439602	0.0163351	0.323622	0.407667	0.431333	-0.18801	-0.372087	-0.324983	0.0300459	-0.782452	-0.507559
mz_170	0.688516	0.518661	0.448728	-0.0860919	-0.520436	0.503506	-0.459156	0.0456705	-0.501749	0.387003	-0.172593	-0.0642844	0.50205	0.00975224	0.143164	-0.0834106	0.00795833	0.252685	0.128498	0.280922	0.310263	0.491259	0.723379	0.267852	0.285562	0.225121	-0.167203	-0.187567	-0.271079	-0.327669	-0.111857	0.464818	0.278547	0.196853	0.297842	0.308732	0.275575	0.287444	0.176508	-0.298102	-0.444032	-0.405334	-0.272262	-0.01364	-0.27427	0.518073	0.145042	0.130396	0.270689
mz_171	-0.0282396	-0.191841	0.0105581	-0.0910876	0.0559325	-0.30613	0.353453	-0.133996	0.0132564	-0.0619065	-0.101174	0.316061	-0.267602	-0.0231934	-0.225054	-0.408053	-0.463207	-0.384384	-0.0763176	-0.534064	-0.600456	-0.50959	-0.392141	-0.556339	-0.547359	-0.408031	0.425316	0.579832	0.348076	0.355844	0.299571	-0.617366	-0.605621	-0.555663	-0.541446	-0.53592	-0.502432	-0.674398	-0.386333	0.228834	0.718908	0.650627	0.4372	-0.703944	0.234288	-0.425996	-0.123249	-0.406346	-0.625947
mz_172	0.22735	0.260525	0.208822	-0.126108	-0.22115	0.16778	0.352182	0.154685	-0.246252	0.385898	0.0251187	0.580354	0.21245	0.210134	0.136165	-0.449762	-0.420688	-0.310684	0.0845492	-0.592963	-0.436858	-0.128245	-0.166499	-0.782844	-0.83565	-0.627655	0.560261	0.401501	-0.282029	-0.248436	0.190056	-0.758027	-0.590944	-0.574671	-0.643252	-0.671214	-0.733511	-0.545144	-0.564423	0.519912	0.531303	0.687517	0.831377	-0.477951	0.0119241	0.00598144	0.465581	-0.108407	-0.734351
mz_173	0.155572	0.241836	0.0755118	-0.0314057	-0.101743	0.19008	0.306699	0.172788	-0.290139	0.440367	0.0214077	0.26509	0.191119	0.0489033	-0.0754527	-0.384362	-0.00549919	-0.00700595	0.096622	-0.215475	-0.0802647	-0.0667718	0.00751828	-0.507255	-0.581778	-0.653197	0.438536	0.377635	-0.292706	-0.197082	0.715624	-0.617899	-0.379996	-0.316358	-0.275057	-0.424712	-0.443949	-0.224057	-0.272784	0.620857	0.496426	0.54849	0.785744	-0.159196	0.088487	0.0454933	0.643841	-0.0745407	-0.6526
mz_174	-0.298356	-0.320926	-0.194486	-0.0292002	0.259526	-0.33354	0.682858	0.21376	0.383115	-0.195151	0.334527	0.388974	-0.293233	-0.189816	-0.306337	-0.376589	-0.378118	-0.437542	-0.274773	-0.59143	-0.604429	-0.570379	-0.625012	-0.720702	-0.735043	-0.66428	0.620789	0.68406	0.0971571	0.189312	0.429469	-0.880034	-0.637682	-0.626046	-0.682762	-0.717554	-0.689323	-0.627366	-0.43368	0.42906	0.735778	0.826669	0.74366	-0.464888	0.402265	-0.312829	0.337937	-0.349843	-0.780481
mz_175	-0.249994	-0.389929	-0.2971	-0.0740623	0.416116	-0.512476	0.267054	-0.323226	0.144441	-0.288057	-0.200466	-0.0293004	-0.518501	0.121568	-0.223789	-0.440565	-0.000571705	-0.243047	-0.0535334	-0.500607	-0.382673	-0.262095	-0.3505	-0.448176	-0.471892	-0.420982	0.412751	0.644477	0.426911	0.456224	0.611756	-0.539528	-0.479893	-0.419002	-0.461578	-0.462358	-0.441704	-0.447791	-0.404402	0.487789	0.725362	0.701043	0.493013	-0.287799	0.559438	-0.551324	0.113937	-0.224505	-0.579107
mz_176	-0.123602	-0.239932	-0.035618	-0.158485	0.129023	-0.213988	0.64466	0.37405	0.454704	-0.216329	0.493569	0.309395	-0.210258	-0.230025	-0.565714	-0.525062	-0.216549	-0.41693	-0.127951	-0.617574	-0.526932	-0.236658	-0.377454	-0.672804	-0.684368	-0.675769	0.454888	0.824189	0.0706731	0.0963283	0.631694	-0.67986	-0.598715	-0.652412	-0.677686	-0.750511	-0.69539	-0.606602	-0.26438	0.304025	0.718019	0.72008	0.630933	-0.391829	0.452486	-0.226412	0.509583	-0.262546	-0.646476
mz_177	0.446924	0.421754	0.348146	-0.0509031	-0.421788	0.384111	0.41396	0.655107	0.0870895	0.355576	0.567907	0.877116	0.458093	-0.283772	-0.42578	-0.642786	-0.762458	-0.571855	-0.248125	-0.673031	-0.722161	-0.239118	-0.181032	-0.748012	-0.756625	-0.533265	0.165049	0.454485	-0.401282	-0.475056	-0.160017	-0.655938	-0.682156	-0.758935	-0.735209	-0.719019	-0.742622	-0.695897	-0.493693	0.212544	0.411591	0.545181	0.571497	-0.77925	-0.242434	0.156354	0.278694	-0.404677	-0.599226
mz_178	-0.531204	-0.80357	-0.51514	0.0823211	0.627393	-0.828719	0.305437	-0.36463	0.58675	-0.748526	-0.0510431	-0.111558	-0.834187	0.0430618	-0.087683	-0.106099	-0.137115	-0.329086	-0.140527	-0.455971	-0.490761	-0.471967	-0.722399	-0.3092	-0.279123	-0.211826	0.20667	0.588408	0.710372	0.733315	0.0733196	-0.400318	-0.30613	-0.306507	-0.444868	-0.344735	-0.33053	-0.487353	-0.246478	0.0843521	0.573419	0.494586	0.108295	-0.299945	0.708607	-0.603419	-0.296695	-0.151584	-0.273908
mz_179	0.518019	0.600174	0.613217	-0.198257	-0.677293	0.530494	0.36345	0.61461	-0.241008	0.635	0.399361	0.953938	0.657146	-0.275732	-0.350633	-0.671862	-0.755285	-0.511891	-0.00670028	-0.655137	-0.622993	-0.0383267	0.0228894	-0.776832	-0.767584	-0.574216	0.314043	0.210679	-0.578259	-0.665935	-0.0786826	-0.642127	-0.72056	-0.762041	-0.687256	-0.71985	-0.749261	-0.683384	-0.485773	0.208196	0.409067	0.54438	0.628603	-0.692547	-0.552352	0.148603	0.351338	-0.383338	-0.574357
mz_180	0.424328	0.447773	0.443671	-0.00395902	-0.574593	0.411206	0.525001	0.57106	-0.114965	0.477633	0.416998	0.974498	0.525043	-0.314461	-0.266641	-0.701747	-0.815144	-0.615485	0.0699367	-0.747756	-0.701325	-0.000172311	-0.146195	-0.867092	-0.838963	-0.699089	0.425044	0.236227	-0.531304	-0.594754	-0.128111	-0.742065	-0.792994	-0.826073	-0.784726	-0.801248	-0.858691	-0.763431	-0.443134	0.0897369	0.52046	0.649227	0.72959	-0.673631	-0.473094	0.0202585	0.310066	-0.406848	-0.588492
mz_181	0.761312	0.818627	0.683003	-0.0977516	-0.825452	0.790473	-0.0486974	0.537051	-0.429066	0.714456	0.256912	0.736497	0.867072	-0.15983	-0.0785302	-0.383848	-0.611728	-0.233261	0.0744823	-0.253076	-0.265959	0.246707	0.402	-0.319253	-0.300514	-0.12158	-0.0397775	-0.180045	-0.685225	-0.800054	-0.480343	-0.0952799	-0.280591	-0.347694	-0.260104	-0.244652	-0.30159	-0.258188	-0.182506	-0.138133	-0.146326	-0.00723161	0.170562	-0.470941	-0.753616	0.46566	0.149168	-0.15443	-0.082765
mz_182	0.745046	0.79752	0.64295	-0.0305721	-0.812302	0.777443	0.0256462	0.589611	-0.364494	0.680309	0.326467	0.768906	0.866939	-0.251243	-0.149491	-0.470561	-0.60974	-0.294632	0.0849314	-0.311727	-0.295854	0.332228	0.37377	-0.359102	-0.328181	-0.194236	-0.0339714	-0.197942	-0.72865	-0.849478	-0.462035	-0.124672	-0.331051	-0.405733	-0.309844	-0.301278	-0.363162	-0.291692	-0.166202	-0.173478	-0.0911475	0.0439573	0.212983	-0.435512	-0.772318	0.419703	0.190656	-0.193156	-0.0811555
mz_183	0.863118	0.812545	0.704565	-0.0356348	-0.890181	0.812058	-0.117732	0.476162	-0.535905	0.748261	0.163185	0.672887	0.877683	-0.209643	-0.0225974	-0.437966	-0.579862	-0.134631	0.243746	-0.187901	-0.183768	0.392771	0.530037	-0.308228	-0.269691	-0.224236	0.00630385	-0.139616	-0.704465	-0.805754	-0.381915	-0.0745175	-0.236118	-0.306531	-0.192806	-0.189146	-0.276155	-0.221453	-0.0862511	-0.212389	-0.147309	-0.0189787	0.183839	-0.431525	-0.736391	0.521397	0.227706	-0.0897671	-0.0215371
mz_184	-0.146851	-0.10599	-0.051212	-0.130859	0.101034	-0.208653	0.0247555	-0.37305	-0.243524	0.0761845	-0.402232	0.188304	-0.187883	0.154272	0.167421	-0.288235	-0.238983	-0.154239	0.127152	-0.385296	-0.314204	-0.205585	-0.161626	-0.450826	-0.462012	-0.385485	0.610592	0.304972	0.084906	0.106009	0.202137	-0.568885	-0.423482	-0.307559	-0.360864	-0.28885	-0.372384	-0.302923	-0.569923	0.517522	0.369538	0.59782	0.564171	-0.15803	0.0592863	-0.362721	0.078131	-0.134897	-0.459848
mz_185	-0.0381377	-0.367971	-0.333279	0.355794	0.255286	-0.408709	0.571352	0.0941431	0.364097	-0.295407	0.229369	0.288372	-0.331725	-0.307389	-0.314024	-0.603974	-0.319543	-0.427761	-0.120399	-0.600342	-0.565726	-0.186074	-0.529118	-0.61442	-0.563528	-0.650764	0.244919	0.525752	0.164911	0.219751	0.264898	-0.652641	-0.561218	-0.608972	-0.612473	-0.644846	-0.643682	-0.680487	-0.165765	0.0506906	0.834243	0.714413	0.485816	-0.563032	0.431123	-0.330985	0.154956	-0.336483	-0.520704
mz_186	-0.0759939	-0.19145	-0.141038	-0.0807197	0.183917	-0.0567565	0.296065	0.23359	0.253072	-0.103202	0.294946	0.0904681	-0.155938	0.170435	-0.105543	-0.217584	0.106983	0.0919137	0.329122	-0.341048	-0.14227	0.0293869	-0.101939	-0.525152	-0.553752	-0.588506	0.277706	0.671086	-0.183165	-0.0815232	0.471902	-0.516789	-0.215429	-0.254258	-0.37936	-0.47641	-0.495832	-0.279756	0.0341591	0.371475	0.41487	0.456347	0.546615	-0.11152	0.518604	0.121636	0.681179	0.354521	-0.269695
mz_187	-0.352729	-0.280291	-0.216006	-0.171016	0.367748	-0.374432	0.0676812	-0.256801	0.241925	-0.344518	-0.107444	-0.363878	-0.414829	-0.00814755	-0.258244	-0.0312222	0.295328	-0.17815	-0.366495	0.0235565	0.0301878	-0.167172	-0.184348	0.172644	0.10113	0.0585408	0.14549	0.317017	0.552007	0.505934	0.571157	0.057693	-0.051723	0.00300151	0.0183045	0.0595111	0.111158	0.135228	-0.311098	0.305015	0.108532	0.118406	0.0386547	0.318769	0.369951	-0.459046	-0.063372	-0.298482	-0.270323
mz_188	-0.0957686	-0.227765	-0.123387	0.0722948	0.111332	-0.28228	0.375659	0.0575411	0.122136	-0.0042447	0.098844	0.421257	-0.182839	-0.240442	-0.279851	-0.653882	-0.310276	-0.344488	0.0902039	-0.662057	-0.553191	-0.13478	-0.392866	-0.755329	-0.724051	-0.80798	0.38619	0.512859	-0.0451437	-0.0307071	0.326683	-0.830867	-0.643852	-0.635421	-0.651323	-0.66912	-0.731587	-0.667219	-0.463886	0.462671	0.778516	0.837525	0.682029	-0.389041	0.177229	-0.324183	0.337574	-0.21931	-0.564854
mz_189	-0.23947	-0.392246	-0.1089	-0.03674	0.186398	-0.444453	0.486279	0.0873664	0.4815	-0.418742	0.271971	0.10505	-0.376178	-0.492363	-0.567721	-0.414832	-0.263578	-0.560492	-0.418018	-0.400697	-0.482516	-0.311269	-0.467239	-0.288947	-0.264165	-0.359247	0.331653	0.54919	0.462103	0.411952	0.431599	-0.355323	-0.468776	-0.500639	-0.443495	-0.407003	-0.351086	-0.439346	-0.337831	0.0160054	0.516608	0.487158	0.234178	-0.231101	0.308058	-0.498046	-0.0224489	-0.599358	-0.481849
mz_190	-0.205997	-0.33582	-0.205706	-0.0211517	0.271735	-0.387238	0.453994	0.0174454	0.377507	-0.323093	0.172294	0.0687468	-0.383907	-0.203347	-0.36403	-0.431888	-0.115017	-0.437477	-0.271467	-0.431665	-0.398064	-0.244834	-0.429333	-0.415444	-0.448039	-0.519899	0.416387	0.709552	0.375474	0.37055	0.599817	-0.502531	-0.468467	-0.472293	-0.48389	-0.468131	-0.458361	-0.390807	-0.43194	0.327696	0.576947	0.605977	0.498007	-0.150631	0.48682	-0.420312	0.22992	-0.391116	-0.618188
mz_191	-0.336172	-0.101963	-0.197002	-0.00423711	0.233826	-0.0469273	0.2109	0.338552	0.381118	-0.133224	0.432326	0.0166775	-0.00968805	-0.465829	-0.412349	-0.0580726	0.0909204	-0.0937723	-0.486377	0.050107	-0.0114633	-0.184214	-0.160611	0.0202709	0.00699931	-0.13124	0.153044	0.0539475	-0.185178	-0.147142	0.235956	-0.17622	-0.0437066	-0.0477434	-0.0138669	-0.0232394	0.000781463	0.164969	-0.166444	0.281712	-0.0853338	0.144383	0.191841	0.321766	0.0119628	-0.0116322	0.339025	-0.224449	-0.149294
mz_192	0.591887	0.757906	0.520221	-0.162883	-0.588834	0.719919	0.288637	0.738576	-0.18557	0.644013	0.522168	0.685592	0.734976	-0.258016	-0.557925	-0.555052	-0.426769	-0.325108	-0.197585	-0.319224	-0.333644	-0.0196522	0.243365	-0.434731	-0.490376	-0.35015	0.0840866	0.256075	-0.574111	-0.645366	0.22219	-0.346164	-0.484343	-0.508199	-0.370771	-0.46116	-0.428826	-0.312553	-0.256911	0.246443	0.182751	0.26965	0.500183	-0.474325	-0.445879	0.29139	0.428965	-0.380529	-0.496793
mz_193	0.74733	0.860163	0.762378	-0.237458	-0.850829	0.807597	-0.108218	0.534426	-0.524351	0.804517	0.215133	0.69706	0.914871	-0.174086	-0.133967	-0.437295	-0.496775	-0.157471	0.0819957	-0.238514	-0.184845	0.325122	0.518415	-0.322582	-0.307931	-0.16008	0.0248121	-0.203392	-0.7636	-0.876693	-0.30497	-0.1067	-0.274213	-0.34107	-0.233778	-0.247383	-0.296894	-0.20535	-0.244582	0.014794	-0.144999	0.0346474	0.220875	-0.36959	-0.778676	0.490923	0.328477	-0.122758	-0.11811
mz_194	0.619629	0.805431	0.644385	-0.146975	-0.749912	0.723739	0.238536	0.596392	-0.455034	0.810238	0.295594	0.833536	0.833599	-0.262263	-0.248956	-0.545939	-0.614598	-0.342902	-0.0724206	-0.368356	-0.360916	0.0413721	0.24537	-0.535818	-0.549062	-0.403733	0.290096	-0.027585	-0.702811	-0.760808	-0.0229134	-0.443178	-0.534743	-0.542978	-0.411682	-0.473465	-0.495651	-0.383326	-0.377947	0.189584	0.171782	0.337355	0.564311	-0.507718	-0.697662	0.28876	0.38043	-0.381283	-0.499165
mz_195	0.602311	0.713572	0.563384	-0.134612	-0.658745	0.663737	0.384338	0.674851	-0.317267	0.720581	0.416687	0.815551	0.734915	-0.26129	-0.366365	-0.650478	-0.559082	-0.362952	-0.0448389	-0.461874	-0.41344	0.0254629	0.17807	-0.668764	-0.698032	-0.596684	0.352087	0.255397	-0.658442	-0.690671	0.230366	-0.581777	-0.616651	-0.640648	-0.525561	-0.624615	-0.636087	-0.476454	-0.355406	0.278083	0.35312	0.483444	0.722237	-0.554848	-0.462409	0.274465	0.566792	-0.356862	-0.632591
mz_196	0.846317	0.883036	0.728499	-0.153412	-0.855923	0.850149	-0.0610295	0.590402	-0.458547	0.767719	0.287826	0.680344	0.906076	-0.218662	-0.205563	-0.469677	-0.540617	-0.203593	0.0074136	-0.197178	-0.212174	0.256001	0.504799	-0.300055	-0.305352	-0.194474	-0.00811021	-0.0152998	-0.669358	-0.785605	-0.216917	-0.09646	-0.283319	-0.354403	-0.225227	-0.233019	-0.280348	-0.201334	-0.217211	-0.0320755	-0.13694	0.0128785	0.238608	-0.439681	-0.679595	0.517651	0.302571	-0.20749	-0.184552
mz_197	-0.310698	-0.138902	-0.122166	-0.111202	0.236423	-0.180047	0.604292	0.31882	0.362097	-0.189001	0.410438	0.355053	-0.101867	-0.223023	-0.466487	-0.164841	-0.357975	-0.347915	-0.548788	-0.420493	-0.507308	-0.626183	-0.427119	-0.373534	-0.345148	-0.0442118	0.420456	0.135805	-0.0809644	0.0197886	0.079816	-0.484984	-0.460386	-0.450377	-0.449441	-0.509325	-0.351013	-0.433372	-0.113936	0.0908953	0.432086	0.491248	0.323377	-0.544338	0.0919641	-0.234793	0.0551339	-0.432396	-0.473909
mz_198	0.351794	0.274237	0.100119	0.0891755	-0.164758	0.163583	-0.717926	-0.437735	-0.491102	0.174115	-0.560478	-0.200702	0.19023	0.141542	0.352354	0.15584	-0.0242138	0.256867	-0.0402998	0.358203	0.244964	0.167785	0.453412	0.514319	0.553479	0.631584	-0.376126	-0.542012	0.0352033	-0.0360963	-0.615678	0.573611	0.374611	0.394177	0.455208	0.593113	0.543872	0.362863	0.0455207	-0.273601	-0.550268	-0.50004	-0.580455	-0.00615299	-0.357234	0.164495	-0.542625	0.0424397	0.46744
mz_199	-0.178922	-0.31792	-0.384879	0.0851779	0.455133	-0.395299	-0.212677	-0.201209	0.22946	-0.327965	-0.0690023	-0.188549	-0.31412	-0.117421	-0.171137	-0.213199	0.149941	0.0594526	-0.342828	-0.122823	-0.0885073	-0.070497	-0.0984445	0.032359	0.0731371	0.0634949	-0.166344	0.0626348	0.113506	0.12846	-0.0732963	-0.0478509	0.032919	-0.0173055	-0.050828	0.0234453	0.0191661	-0.0123067	-0.189309	0.244783	0.0794149	0.175787	-0.115062	-0.0375008	0.328094	-0.0924106	0.0376348	-0.00428666	0.0348182
mz_200	-0.387728	-0.379166	-0.0822536	-0.190548	0.195193	-0.37206	0.40096	-0.11283	0.0862209	-0.132199	-0.0536774	0.0903401	-0.342591	0.0395459	-0.0698236	-0.242834	0.0214529	-0.116944	0.324111	-0.436766	-0.234134	-0.0524123	-0.293979	-0.542699	-0.527906	-0.591706	0.62042	0.389767	0.0700988	0.14409	0.576464	-0.605493	-0.41487	-0.363558	-0.430814	-0.511279	-0.512124	-0.40632	-0.192181	0.358529	0.62763	0.646786	0.57849	-0.0208846	0.291123	-0.390693	0.388217	0.0311519	-0.405126
mz_201	-0.225025	-0.120802	-0.103182	-0.167033	0.199364	-0.203174	0.315636	-0.0532339	0.0706058	-0.000511919	-0.0123414	0.215225	-0.228261	-0.0278103	-0.349134	-0.359311	-0.191277	-0.288879	-0.160817	-0.399757	-0.425893	-0.494024	-0.32818	-0.46534	-0.522854	-0.448894	0.479282	0.612781	0.203197	0.219643	0.579114	-0.650022	-0.547904	-0.432276	-0.420922	-0.430817	-0.412648	-0.388885	-0.511084	0.623138	0.563783	0.659971	0.620101	-0.276477	0.212198	-0.439257	0.123752	-0.369431	-0.673587
mz_202	-0.43719	-0.476407	-0.260224	-0.0961305	0.380809	-0.491445	0.549032	-0.0679828	0.3389	-0.346266	0.0877107	-0.0416839	-0.501502	-0.0542412	-0.277317	-0.271405	0.0837587	-0.26162	-0.0226878	-0.392595	-0.2694	-0.225794	-0.451844	-0.436545	-0.461456	-0.545368	0.553266	0.611797	0.340066	0.409312	0.789537	-0.553324	-0.426188	-0.385348	-0.426509	-0.499557	-0.452719	-0.367388	-0.226804	0.361762	0.688516	0.646075	0.555868	-0.0279258	0.547957	-0.502389	0.322407	-0.197711	-0.565858
mz_203	0.0117681	-0.130938	-0.073972	-0.0512702	0.125199	-0.277591	0.181226	-0.236661	0.0121677	-0.133525	-0.185512	0.334837	-0.247086	0.0641451	-0.234448	-0.512732	-0.483416	-0.413328	-0.070825	-0.65945	-0.668841	-0.347045	-0.27696	-0.510011	-0.476196	-0.200617	0.319859	0.419881	0.258861	0.221991	-0.00848504	-0.49732	-0.616445	-0.560447	-0.576941	-0.497416	-0.480342	-0.652199	-0.411276	0.17463	0.610249	0.626317	0.333435	-0.723248	0.132288	-0.492449	-0.273855	-0.380927	-0.448089
mz_204	-0.29346	-0.364908	-0.356936	0.101568	0.39018	-0.38454	0.415702	0.153579	0.497592	-0.284275	0.331829	0.224788	-0.34987	-0.262414	-0.355862	-0.394274	-0.197848	-0.378091	-0.383926	-0.460413	-0.491625	-0.449845	-0.595464	-0.511448	-0.539697	-0.581318	0.244159	0.661092	0.175915	0.204978	0.310628	-0.69273	-0.456255	-0.470585	-0.5274	-0.494598	-0.51952	-0.436151	-0.511773	0.52378	0.547801	0.660826	0.535194	-0.232888	0.450611	-0.274221	0.264246	-0.295365	-0.591478
mz_205	0.451969	0.508022	0.665263	-0.367932	-0.650578	0.421013	-0.0572028	0.234696	-0.401856	0.453701	0.0235454	0.551981	0.555985	-0.308849	-0.312028	-0.556266	-0.521609	-0.298589	0.0849131	-0.411627	-0.341712	0.291623	0.42707	-0.330713	-0.252968	-0.127458	0.336576	-0.114768	-0.445452	-0.57868	-0.14309	-0.132718	-0.431501	-0.461178	-0.341067	-0.301212	-0.315608	-0.328543	-0.306046	-0.0918412	0.0306408	0.236619	0.184062	-0.35045	-0.666178	0.042364	0.141948	-0.320172	-0.121349
mz_206	0.463	0.521693	0.246819	0.0877953	-0.411193	0.536604	0.233982	0.465335	-0.0644272	0.33086	0.350929	0.698024	0.517849	-0.187975	-0.113124	-0.448768	-0.686438	-0.435327	-0.154074	-0.418613	-0.477988	-0.0337096	0.0537588	-0.478668	-0.490476	-0.306429	0.335642	0.222723	-0.493681	-0.539953	-0.313618	-0.407381	-0.46931	-0.482224	-0.473403	-0.388773	-0.467418	-0.3096	-0.368315	0.0330772	0.0118375	0.32125	0.528102	-0.437225	-0.371202	0.196314	0.193313	-0.327514	-0.369773
mz_207	-0.110673	-0.104896	-0.196563	0.302984	0.111073	-0.129727	0.56626	0.453578	0.398588	-0.100443	0.534329	0.528227	0.0347543	-0.653701	-0.451412	-0.40037	-0.542011	-0.476219	-0.609996	-0.402003	-0.567353	-0.462607	-0.51929	-0.42893	-0.363478	-0.353113	0.211615	0.0659498	-0.212433	-0.153154	-0.160154	-0.578069	-0.476692	-0.523507	-0.465859	-0.469878	-0.433325	-0.474263	-0.237301	0.00894571	0.410232	0.507889	0.349718	-0.501248	-0.0775474	-0.107757	0.0807096	-0.562049	-0.435627
mz_208	0.713762	0.759203	0.667163	-0.109093	-0.789908	0.748084	-0.120877	0.588431	-0.31885	0.648155	0.34365	0.659456	0.840221	-0.290276	-0.191	-0.334238	-0.548762	-0.201585	-0.0353342	-0.15162	-0.215985	0.219554	0.396148	-0.194067	-0.1688	-0.055147	-0.198638	-0.193314	-0.635335	-0.771491	-0.503554	0.00804558	-0.1789	-0.273459	-0.166173	-0.139483	-0.188167	-0.178044	-0.15854	-0.159862	-0.246712	-0.118187	0.0108612	-0.385453	-0.743746	0.508092	0.119055	-0.162916	0.0182935
mz_209	0.245983	0.403284	0.589815	-0.291755	-0.580757	0.260677	0.226036	0.254372	-0.349162	0.530622	0.0626193	0.810847	0.472407	-0.206947	-0.109659	-0.495803	-0.694124	-0.499434	0.0232982	-0.613642	-0.551303	-0.0239232	-0.0576711	-0.639633	-0.59389	-0.374044	0.410867	-0.135916	-0.40321	-0.504924	-0.25607	-0.528238	-0.640485	-0.644788	-0.595886	-0.574062	-0.611734	-0.616037	-0.58988	0.162787	0.338834	0.497014	0.446488	-0.498876	-0.659901	-0.0948007	0.093511	-0.380581	-0.442513
mz_210	0.583588	0.660148	0.569241	-0.0307841	-0.728491	0.686116	0.292222	0.704939	-0.249291	0.647724	0.468653	0.887266	0.785122	-0.342354	-0.210317	-0.55428	-0.666799	-0.346418	0.125949	-0.464708	-0.417272	0.210163	0.189428	-0.631665	-0.59778	-0.521752	0.253902	0.00155102	-0.813831	-0.866771	-0.237573	-0.474286	-0.510641	-0.574933	-0.504725	-0.54545	-0.610158	-0.457832	-0.222509	-0.010271	0.152925	0.337892	0.538252	-0.474107	-0.650297	0.368053	0.454295	-0.20146	-0.303313
mz_211	0.303277	0.317806	0.384403	-0.088141	-0.444032	0.231904	0.497655	0.436667	-0.0984223	0.39024	0.314991	0.926154	0.384075	-0.243739	-0.197865	-0.674791	-0.811729	-0.620022	-0.0508693	-0.804565	-0.749201	-0.140141	-0.250082	-0.90086	-0.872309	-0.66507	0.5066	0.265411	-0.41736	-0.462823	-0.136676	-0.812437	-0.808249	-0.844848	-0.839525	-0.830596	-0.879803	-0.809053	-0.591932	0.216136	0.576719	0.742603	0.735104	-0.721555	-0.344722	-0.0469648	0.297099	-0.41269	-0.677705
mz_212	0.394917	0.372018	0.15829	0.15105	-0.317342	0.383664	0.620058	0.592551	0.0491024	0.340082	0.502626	0.800309	0.378156	-0.17579	-0.255469	-0.65454	-0.627831	-0.5181	-0.0263528	-0.654225	-0.613584	-0.113402	-0.215638	-0.847325	-0.883188	-0.779063	0.430831	0.555809	-0.444941	-0.432332	0.153728	-0.805859	-0.723661	-0.74256	-0.741611	-0.78728	-0.839131	-0.640935	-0.369051	0.257256	0.564247	0.688509	0.893008	-0.618568	-0.0809259	0.0831316	0.484847	-0.327474	-0.726704
mz_213	-0.526642	-0.620184	-0.523213	0.0954784	0.595828	-0.580201	0.338493	-0.202396	0.406236	-0.528504	0.00577172	-0.171187	-0.60213	-0.110967	-0.148452	-0.16276	0.0995204	-0.0692998	-0.0710487	-0.265047	-0.204296	-0.243055	-0.403029	-0.277186	-0.250525	-0.366927	0.503789	0.455643	0.253074	0.379977	0.465047	-0.462724	-0.235004	-0.194073	-0.270084	-0.275169	-0.262377	-0.191558	-0.0885439	0.249726	0.456319	0.546455	0.393126	0.0329392	0.587889	-0.410342	0.229727	-0.0649354	-0.288303
mz_214	-0.265122	-0.0641452	0.261354	-0.547855	-0.0299747	-0.120608	0.488696	0.184939	0.0634341	0.0780496	0.178197	0.179792	-0.0806809	0.0478479	-0.28759	-0.15975	-0.0167404	-0.250076	-0.0913177	-0.354587	-0.220082	-0.275472	-0.221181	-0.458348	-0.521957	-0.406659	0.609901	0.453384	0.0774321	0.101762	0.75532	-0.498313	-0.432191	-0.409038	-0.422895	-0.53651	-0.445101	-0.337402	-0.379612	0.493806	0.490427	0.51965	0.555055	-0.0813729	0.188534	-0.241672	0.475653	-0.192087	-0.659676
mz_215	-0.214869	-0.098331	0.0794871	-0.21792	-0.00775337	-0.0300856	0.600837	0.425976	0.30186	-0.0240152	0.472212	0.335147	-0.0135552	-0.210671	-0.40508	-0.375895	-0.0905521	-0.312623	0.0883242	-0.494591	-0.314357	0.0173143	-0.236251	-0.602122	-0.614887	-0.659163	0.535594	0.466734	-0.223408	-0.197507	0.566053	-0.603077	-0.496692	-0.513045	-0.545236	-0.645497	-0.625149	-0.398753	-0.208994	0.320116	0.504287	0.599269	0.670409	-0.0107804	0.129397	-0.165951	0.635821	-0.111313	-0.478737
mz_216	-0.366002	-0.435263	-0.281014	-0.181126	0.466781	-0.483623	0.376953	-0.170855	0.333446	-0.394513	0.00140232	-0.209725	-0.551794	0.395071	-0.0882977	-0.0303492	0.264375	-0.112711	-0.0252794	-0.311531	-0.14755	-0.251113	-0.403987	-0.27092	-0.341601	-0.195405	0.213787	0.570718	0.478134	0.539196	0.606516	-0.288315	-0.209736	-0.199202	-0.32056	-0.393422	-0.303559	-0.280301	-0.107978	0.344211	0.570107	0.393977	0.283294	-0.114609	0.740131	-0.373048	0.162631	0.0546874	-0.428793
mz_217	-0.438049	-0.40028	-0.0883667	-0.371473	0.368464	-0.504502	-0.174441	-0.420986	0.160499	-0.434282	-0.275075	-0.570345	-0.483965	0.188988	-0.0648397	0.430815	0.368155	0.111625	-0.364754	0.267662	0.20132	-0.315738	-0.100371	0.502896	0.49232	0.632983	-0.131245	-0.104346	0.673249	0.65786	0.161565	0.459241	0.300468	0.307836	0.302122	0.324379	0.477475	0.231546	0.0547075	-0.0680825	-0.13089	-0.291826	-0.576751	0.164331	0.329649	-0.307718	-0.427462	-0.0603407	0.139973
mz_218	-0.638939	-0.663571	-0.333036	-0.121995	0.516802	-0.713129	0.340902	-0.143283	0.630587	-0.620319	0.146282	-0.132966	-0.666057	-0.209122	-0.290469	0.0255958	-0.0543254	-0.407495	-0.527364	-0.227067	-0.348685	-0.595163	-0.716126	-0.101673	-0.118101	-0.111202	0.203299	0.459991	0.69289	0.673561	0.24969	-0.279713	-0.223831	-0.226109	-0.286996	-0.200763	-0.146761	-0.251509	-0.428007	0.226451	0.33863	0.338464	0.0479501	0.00612475	0.50426	-0.553859	-0.20859	-0.381541	-0.372793
mz_219	-0.193032	-0.0837126	-0.37761	0.372543	0.280599	-0.203527	0.660428	0.121982	0.197323	-0.0538439	0.183427	0.477371	-0.1158	-0.262361	-0.224862	-0.423922	-0.466246	-0.526597	-0.504742	-0.501685	-0.587082	-0.548153	-0.623383	-0.534436	-0.536791	-0.401007	0.459419	0.140373	-0.0461795	0.0517309	0.083585	-0.746258	-0.642575	-0.558317	-0.538307	-0.553319	-0.524428	-0.506387	-0.396804	0.278024	0.651181	0.728492	0.667758	-0.510718	0.0443628	-0.425489	-0.0244269	-0.623617	-0.724067
mz_220	0.723609	0.673215	0.57856	-0.199877	-0.630031	0.573276	-0.0589101	0.424969	-0.430675	0.693339	0.165537	0.693075	0.66516	-0.139962	-0.319291	-0.670883	-0.522378	-0.19242	0.0256262	-0.437297	-0.40201	0.0722941	0.340204	-0.535732	-0.533723	-0.382645	0.0124498	0.226967	-0.535882	-0.628702	-0.0436035	-0.391005	-0.469085	-0.52341	-0.42064	-0.443577	-0.482472	-0.466626	-0.387623	0.289866	0.23658	0.341845	0.387283	-0.68012	-0.434217	0.337021	0.343658	-0.193826	-0.376303
mz_221	0.381346	0.461188	0.526572	-0.10607	-0.632374	0.461261	0.196492	0.46362	-0.171292	0.382232	0.30521	0.735116	0.588947	-0.554721	-0.251229	-0.50478	-0.757633	-0.474815	-0.0865416	-0.406611	-0.460178	0.128018	0.16035	-0.430167	-0.352893	-0.314318	0.470187	-0.0674509	-0.54718	-0.640401	-0.320138	-0.326478	-0.490414	-0.530015	-0.431788	-0.35554	-0.41942	-0.347769	-0.357067	-0.179309	-0.0229632	0.297578	0.361568	-0.320607	-0.698899	0.109663	0.179538	-0.45234	-0.221748
mz_222	0.576955	0.421913	0.360775	0.189902	-0.558186	0.388674	0.205555	0.445543	-0.197815	0.425208	0.279675	0.698693	0.521918	-0.655116	-0.36574	-0.714211	-0.722878	-0.411253	-0.111741	-0.376537	-0.485442	0.0554844	0.0986935	-0.482158	-0.408036	-0.531204	0.221878	0.139283	-0.434271	-0.496477	-0.110424	-0.437057	-0.522167	-0.574947	-0.40866	-0.3896	-0.459086	-0.469638	-0.277208	-0.114203	0.25754	0.389892	0.397696	-0.569809	-0.48813	0.14747	0.188608	-0.512946	-0.343959
mz_223	-0.0547497	0.00784434	0.21415	-0.40633	-0.051959	-0.132559	0.418883	0.0668677	-0.054107	0.191298	0.0337913	0.438566	-0.0805491	0.146351	-0.2707	-0.487681	-0.291868	-0.402173	-0.0172189	-0.672075	-0.543793	-0.364647	-0.324294	-0.759496	-0.823063	-0.609243	0.524195	0.654943	0.1074	0.0876633	0.577299	-0.781366	-0.708028	-0.664355	-0.694338	-0.748042	-0.722449	-0.676859	-0.65564	0.685382	0.773258	0.796294	0.73856	-0.494956	0.185727	-0.341575	0.327771	-0.275781	-0.846732
mz_224	0.10842	-0.125419	0.0781203	0.0381014	-0.11369	-0.1599	0.210998	0.0644009	0.012637	-0.0389636	0.0583485	0.300234	-0.0273603	-0.574357	-0.438481	-0.72129	-0.354932	-0.305842	0.0507278	-0.480933	-0.424158	0.151095	-0.00592538	-0.46506	-0.353058	-0.565561	0.431107	0.292228	-0.0961342	-0.12201	0.275137	-0.450793	-0.506208	-0.540723	-0.436639	-0.426576	-0.4608	-0.477661	-0.220791	-0.018542	0.491078	0.586957	0.369595	-0.312839	-0.0548924	-0.244292	0.260097	-0.367915	-0.273421
mz_225	-0.366401	-0.645202	-0.479985	0.233806	0.472364	-0.592886	0.353711	-0.286979	0.418183	-0.633856	-0.0576343	-0.233602	-0.648973	-0.186345	-0.100461	-0.214212	0.0119945	-0.210064	0.0314287	-0.236492	-0.213725	-0.0734971	-0.38216	-0.194902	-0.154241	-0.379987	0.476233	0.537568	0.481544	0.549715	0.449891	-0.296391	-0.228091	-0.205586	-0.249002	-0.208836	-0.224622	-0.2078	-0.00948903	-0.0833198	0.44165	0.437972	0.279817	0.039194	0.60438	-0.498009	0.0312723	-0.178513	-0.220465
mz_226	0.0281441	-0.00345415	-0.240283	0.306133	0.140702	-0.0714243	0.405835	0.203177	0.3272	-0.139344	0.301508	0.268419	-0.0595715	-0.200815	-0.492226	-0.548561	-0.113976	-0.473369	-0.128222	-0.480514	-0.39812	0.103206	-0.285842	-0.305345	-0.307355	-0.276006	-0.138403	0.172582	0.0209986	-0.0513871	0.112813	-0.248457	-0.453331	-0.450641	-0.415472	-0.433614	-0.412131	-0.39018	-0.112984	0.0309858	0.509009	0.376772	0.266594	-0.232441	0.0372062	-0.388012	-0.0587405	-0.371232	-0.260664
mz_227	0.024082	0.0252125	-0.291456	0.328041	0.159702	-0.098388	0.236649	-0.180891	-0.123938	0.0515727	-0.196356	0.365977	-0.0611733	-0.115803	-0.0912936	-0.610282	-0.367312	-0.343998	-0.0556628	-0.516757	-0.471329	-0.0956569	-0.205167	-0.492234	-0.468419	-0.41523	0.457707	0.142661	-0.118522	-0.0857291	0.0643325	-0.602807	-0.587756	-0.472232	-0.449815	-0.399817	-0.466123	-0.399397	-0.40725	0.298579	0.521625	0.691887	0.636212	-0.360288	-0.0653668	-0.43085	-0.00907357	-0.408605	-0.473876
mz_228	0.109689	-0.041619	0.230385	-0.135897	-0.252612	0.0379719	0.285275	0.121588	-0.0865687	0.0572486	0.0639862	0.364111	0.0705321	-0.189443	-0.00952038	-0.447336	-0.375746	-0.179779	0.413567	-0.484649	-0.324412	0.235197	0.069241	-0.621772	-0.546166	-0.642141	0.756796	0.375703	-0.294209	-0.257717	0.221583	-0.536208	-0.443223	-0.471425	-0.499306	-0.504751	-0.57897	-0.425432	-0.143162	-0.0171101	0.348647	0.558697	0.590343	-0.206824	-0.0127322	-0.0203488	0.517414	0.000719381	-0.27108
mz_229	-0.554855	-0.651612	-0.25391	-0.189781	0.461981	-0.707716	-0.185675	-0.539043	0.0852132	-0.406452	-0.401725	-0.428067	-0.592391	0.109501	0.170261	0.180484	0.353467	0.240743	0.0958362	0.000658433	0.121426	-0.0507271	-0.195079	0.0873588	0.155116	0.0827221	0.0763973	-0.114528	0.374157	0.430403	0.104914	0.00906332	0.165833	0.158934	0.0766784	0.086329	0.108126	-0.00367448	-0.0237131	0.138381	0.163262	0.109123	-0.238369	0.212998	0.372466	-0.301562	-0.0552968	0.250848	0.165434
mz_230	-0.0843788	-0.268129	-0.519324	0.409973	0.418415	-0.336406	0.408	-0.278311	0.145258	-0.270127	-0.163106	-0.0201774	-0.438121	0.123138	0.0406613	-0.31409	-0.101742	-0.281886	-0.119058	-0.289231	-0.300414	-0.304083	-0.441653	-0.338104	-0.397391	-0.427259	0.386956	0.596352	0.410343	0.499734	0.472968	-0.494483	-0.38994	-0.292428	-0.32548	-0.314818	-0.340583	-0.288067	-0.233859	0.25708	0.605282	0.557989	0.577685	-0.272538	0.564031	-0.449118	-0.0293476	-0.313497	-0.605343
mz_231	-0.504934	-0.34512	-0.461187	0.126081	0.534226	-0.398227	0.554798	0.0336597	0.57762	-0.565345	0.268574	-0.0818029	-0.405988	-0.156299	-0.333444	0.059518	-0.0511221	-0.410194	-0.719498	-0.14965	-0.264598	-0.506976	-0.536081	0.0615489	0.0470681	0.246572	0.262491	0.0468637	0.354892	0.42001	0.117294	-0.0819025	-0.20462	-0.163021	-0.178086	-0.161582	-0.0108943	-0.0682552	-0.0443435	-0.0986475	0.209803	0.206542	0.0641918	-0.0812276	0.307034	-0.493465	-0.268882	-0.523279	-0.311608
mz_232	-0.0449455	-0.104701	0.012994	-0.0618605	0.023861	-0.19741	0.431112	0.0593033	0.122952	-0.146556	0.100878	0.248163	-0.107888	-0.405572	-0.370528	-0.510424	-0.382032	-0.484993	-0.382061	-0.434918	-0.450253	-0.200474	-0.207152	-0.383447	-0.348648	-0.347492	0.655366	0.352262	0.113977	0.120129	0.372642	-0.439736	-0.535618	-0.533026	-0.46279	-0.433346	-0.397534	-0.385148	-0.396607	0.0679209	0.43587	0.585477	0.459957	-0.309118	0.0910136	-0.358084	0.163956	-0.599577	-0.573524
mz_233	0.280429	0.415511	0.308978	-0.153734	-0.330169	0.3795	0.232378	0.47159	0.111372	0.166734	0.428606	0.407998	0.392735	-0.254679	-0.528566	-0.504053	-0.234289	-0.468225	-0.16383	-0.391421	-0.295148	0.284961	0.150832	-0.235885	-0.253951	-0.138022	0.0598453	0.116707	-0.286158	-0.434524	0.0664379	-0.0603951	-0.389898	-0.432576	-0.366062	-0.349056	-0.332229	-0.198985	-0.252147	0.00611376	0.0662343	0.175323	0.242016	-0.0822829	-0.32808	-0.055236	0.201569	-0.36171	-0.210574
mz_234	0.449616	0.607676	0.590239	-0.200511	-0.630932	0.514818	0.430692	0.586774	-0.136023	0.445279	0.420546	0.731083	0.614639	-0.378578	-0.475342	-0.501807	-0.668587	-0.607788	-0.321657	-0.432193	-0.491533	-0.066611	0.0714264	-0.402592	-0.399542	-0.178374	0.317053	0.027886	-0.358788	-0.465529	-0.0236097	-0.26447	-0.585399	-0.613679	-0.472074	-0.4913	-0.431672	-0.435543	-0.324572	-0.117367	0.192878	0.278874	0.358531	-0.534178	-0.58368	0.0124557	0.0904206	-0.647319	-0.488135
mz_235	-0.282899	-0.0250874	0.143783	-0.40858	0.0403534	-0.0797339	0.17775	0.119464	0.306708	-0.220978	0.22421	0.248168	-0.0563719	-0.0431294	-0.422246	-0.0205368	-0.319415	-0.422398	-0.353518	-0.366269	-0.438162	-0.344979	-0.195847	-0.0773369	-0.0607798	0.349392	0.146245	-0.0084344	0.120448	0.0161204	-0.276286	-0.0187002	-0.308315	-0.286476	-0.313519	-0.222028	-0.110631	-0.248603	-0.248818	-0.0518135	0.00597062	0.115307	-0.0979931	-0.236156	-0.204444	-0.364538	-0.36674	-0.356921	-0.0784956
mz_236	0.580055	0.545167	0.667272	-0.236321	-0.720749	0.600398	0.244717	0.807499	-0.0167254	0.477978	0.647455	0.750503	0.676501	-0.356515	-0.461039	-0.520207	-0.544466	-0.347708	0.0869252	-0.451436	-0.411375	0.20908	0.20156	-0.53726	-0.511768	-0.439023	-0.00591242	0.243212	-0.58882	-0.708268	-0.121931	-0.294738	-0.421195	-0.561863	-0.494855	-0.540403	-0.554753	-0.485276	-0.147427	-0.0744127	0.137954	0.196749	0.284539	-0.48403	-0.448383	0.408086	0.444686	-0.1373	-0.20485
mz_237	-0.518583	-0.414116	-0.308042	0.0103484	0.392657	-0.564392	0.577421	-0.200959	0.319169	-0.361115	-0.0278615	0.272264	-0.461888	-0.0553301	-0.0772446	-0.275305	-0.356511	-0.635984	-0.381999	-0.629905	-0.60351	-0.475464	-0.747937	-0.507551	-0.507124	-0.296495	0.622603	0.2218	0.351746	0.37014	0.0919804	-0.638379	-0.623792	-0.551513	-0.634483	-0.558901	-0.538455	-0.539807	-0.61968	0.294229	0.63384	0.738507	0.524037	-0.259861	0.214771	-0.729517	-0.159516	-0.52802	-0.660804
mz_238	-0.00939449	-0.0762627	-0.0664008	-0.154779	0.172406	-0.170443	0.346223	0.073282	0.141473	-0.043941	0.11942	0.264958	-0.175572	0.16083	-0.11932	-0.248772	-0.315639	-0.285697	-0.390542	-0.427976	-0.470403	-0.620487	-0.390444	-0.51496	-0.585418	-0.326365	0.3688	0.685436	0.200758	0.260296	0.300071	-0.608801	-0.441453	-0.4441	-0.511746	-0.508089	-0.468307	-0.467397	-0.495242	0.49886	0.50464	0.570012	0.521487	-0.598174	0.457063	-0.0952165	0.199448	-0.248932	-0.745396
mz_239	-0.650928	-0.599439	-0.704181	0.119964	0.832811	-0.675839	0.167841	-0.409467	0.438462	-0.583698	-0.149247	-0.488267	-0.743855	0.111706	-0.152766	0.119317	0.403589	-0.0349649	-0.455673	0.0506721	0.00321495	-0.498702	-0.511934	0.15593	0.0849951	0.0664681	0.0759247	0.333408	0.652878	0.734957	0.522328	-0.125875	-0.00142658	0.0994083	0.0470221	0.0605673	0.131812	0.110008	-0.17596	0.431405	0.292134	0.238687	0.0817539	0.216435	0.691988	-0.561088	-0.171227	-0.193687	-0.292097
mz_240	-0.307084	-0.27452	-0.474129	0.0890292	0.548794	-0.373392	0.326828	-0.119722	0.266226	-0.241437	0.0147469	-0.0987652	-0.428998	0.00326081	-0.379042	-0.262787	0.112923	-0.16606	-0.435461	-0.200459	-0.24325	-0.540566	-0.407058	-0.210076	-0.290534	-0.26495	0.22659	0.578508	0.365676	0.445822	0.689512	-0.46239	-0.333752	-0.236056	-0.223745	-0.265674	-0.197338	-0.181323	-0.311966	0.593719	0.547665	0.528747	0.455543	-0.182966	0.54706	-0.430384	0.0909843	-0.356061	-0.620626
mz_241	-0.52566	-0.76074	-0.627015	0.183066	0.722046	-0.832549	0.0893611	-0.595071	0.379999	-0.746081	-0.323914	-0.492865	-0.833545	0.0167316	-0.0363622	-0.023236	0.241143	-0.0740852	-0.1888	-0.102036	-0.0912517	-0.205119	-0.418889	0.10417	0.142346	0.063905	0.13885	0.232875	0.720458	0.776131	0.270101	-0.0236699	-0.0221862	0.0129549	-0.0409384	0.021674	0.0649337	-0.0736439	-0.018176	-0.0195223	0.358434	0.247817	-0.108417	0.052046	0.67092	-0.617082	-0.310184	-0.143826	-0.0602416
mz_242	-0.571565	-0.438952	-0.348942	-0.152574	0.549176	-0.486972	0.424677	-0.0970649	0.464971	-0.488854	0.115658	-0.343514	-0.54418	0.0671777	-0.304239	0.203701	0.278817	-0.160149	-0.505305	0.0230345	-0.0354831	-0.541165	-0.458677	0.112788	0.038004	0.132621	0.214383	0.334317	0.584227	0.654081	0.621536	-0.0629517	-0.0690152	-0.0126982	-0.032464	-0.0907498	0.0732273	0.0198187	-0.0492584	0.205736	0.285038	0.159629	0.0617619	0.0891022	0.566197	-0.459036	-0.084561	-0.29045	-0.378261
mz_243	-0.193721	-0.219509	-0.122546	-0.181673	0.274176	-0.30733	-0.349039	-0.386095	-0.117968	-0.160682	-0.362749	-0.381706	-0.252124	-0.10236	-0.189204	-0.00873199	0.248998	0.269364	-0.199859	0.181428	0.145297	-0.119105	0.201133	0.295361	0.343424	0.286823	0.032733	-0.0845143	0.212357	0.241048	0.231698	0.174797	0.150226	0.188611	0.264755	0.280164	0.343891	0.196258	0.0036806	0.130018	-0.0622447	-0.0162034	-0.264002	0.0710584	0.121858	-0.162602	-0.0994137	-0.0642081	0.124905
mz_244	-0.420242	-0.187881	-0.167166	-0.205724	0.345156	-0.269637	0.436421	0.171947	0.427471	-0.149206	0.31782	0.0308788	-0.295241	0.091193	-0.410156	0.0707814	0.0929368	-0.298364	-0.517116	-0.149634	-0.236573	-0.689052	-0.589291	-0.146438	-0.274219	-0.0916941	-0.0501366	0.44462	0.417214	0.412575	0.488542	-0.31919	-0.254576	-0.205373	-0.230345	-0.295619	-0.174335	-0.210201	-0.353851	0.554554	0.405339	0.264937	0.224768	-0.11055	0.361087	-0.341662	-0.0427745	-0.311773	-0.571382
mz_245	-0.351646	-0.162479	-0.364654	0.0485541	0.456121	-0.30674	0.362259	0.138851	0.509177	-0.282673	0.32444	0.10692	-0.274567	-0.264805	-0.726569	-0.29095	-0.0603311	-0.472332	-0.786351	-0.292775	-0.42915	-0.591784	-0.523854	-0.0812579	-0.137198	0.0319704	-0.126797	0.263587	0.330126	0.281812	0.251997	-0.264819	-0.391472	-0.336578	-0.280052	-0.263854	-0.144961	-0.242155	-0.398324	0.401102	0.399653	0.359515	0.140117	-0.227872	0.180613	-0.523791	-0.248262	-0.639918	-0.472043
mz_246	-0.0317484	-0.329728	-0.446936	0.271276	0.415689	-0.349669	0.378109	-0.037359	0.295749	-0.313011	0.093816	0.0714972	-0.384937	0.0400036	-0.100573	-0.412207	-0.117542	-0.174555	-0.141247	-0.43554	-0.377724	-0.259692	-0.381639	-0.496532	-0.507845	-0.499132	0.286918	0.680342	0.177485	0.291609	0.355657	-0.577721	-0.366938	-0.389656	-0.466111	-0.482472	-0.488366	-0.430678	-0.165665	0.274503	0.634293	0.621955	0.521583	-0.457827	0.685461	-0.160236	0.287669	-0.097385	-0.521011
mz_247	0.193421	0.283238	0.184842	0.0451228	-0.266122	0.339277	0.37968	0.612916	0.313179	0.0665505	0.627013	0.446499	0.314044	-0.475331	-0.513108	-0.187322	-0.504978	-0.466773	-0.476064	-0.127035	-0.376422	-0.325818	-0.151467	-0.130573	-0.152206	-0.0911423	0.0399616	0.260318	-0.118527	-0.186731	-0.0842486	-0.146544	-0.295192	-0.32637	-0.233454	-0.202076	-0.161499	-0.179582	-0.133146	-0.159021	-0.0377744	0.0485751	0.146572	-0.300728	-0.248962	0.0744715	-0.0529559	-0.528744	-0.271376
mz_248	0.765367	0.677419	0.522882	-0.0323853	-0.674157	0.663132	-0.0855378	0.366957	-0.508945	0.669846	0.0861481	0.624854	0.699728	-0.188167	-0.156005	-0.606566	-0.522748	-0.082021	0.248813	-0.306085	-0.275085	0.264475	0.486302	-0.453039	-0.419066	-0.393543	0.162372	0.127895	-0.650106	-0.701307	-0.0925975	-0.30876	-0.372093	-0.399612	-0.289482	-0.305326	-0.385174	-0.315683	-0.157431	0.048457	0.0885957	0.251777	0.401465	-0.528824	-0.509747	0.387952	0.354728	-0.106502	-0.193304
mz_249	-0.471105	-0.118667	-0.136916	-0.160831	0.231591	-0.122008	0.140507	0.0262564	0.124112	-0.0168615	0.0732005	0.0625302	-0.0982721	-0.120643	-0.162403	0.0410298	0.0531774	-0.0626722	-0.19494	-0.0583038	-0.0669588	-0.281025	-0.21442	-0.0974905	-0.124872	-0.111567	0.322777	-0.0164851	-0.0949699	-0.0591081	0.200243	-0.306002	-0.153802	-0.0560369	-0.0730328	-0.0731046	-0.0656558	0.0529235	-0.300888	0.459141	0.0415473	0.262555	0.29863	0.270624	-0.088231	-0.243519	0.139677	-0.134857	-0.208224
mz_250	0.648973	0.776259	0.728383	-0.330257	-0.776428	0.794376	-0.240123	0.541423	-0.437599	0.735404	0.255983	0.487279	0.840211	-0.26738	-0.287724	-0.388829	-0.2676	-0.000144373	0.138554	-0.0598462	-0.01554	0.386032	0.642352	-0.175442	-0.177956	-0.201848	-0.0144513	-0.0280523	-0.710901	-0.83507	-0.0295398	-0.0176964	-0.136049	-0.19307	-0.0656304	-0.0837462	-0.144728	0.00276037	-0.194643	0.13828	-0.280676	-0.0537832	0.175596	-0.0717063	-0.677641	0.520775	0.472745	-0.0274204	-0.00889002
mz_251	-0.301115	-0.2403	-0.147411	-0.0136972	0.214058	-0.343038	0.345299	-0.00420461	0.0374223	0.0167511	0.0137539	0.257024	-0.179189	-0.29473	-0.306504	-0.410903	-0.144093	-0.184388	-0.158914	-0.408313	-0.354236	-0.298922	-0.351726	-0.47985	-0.435873	-0.480415	0.398929	0.11792	-0.0698036	0.00651427	0.36228	-0.655942	-0.47394	-0.428801	-0.388506	-0.462726	-0.433564	-0.442549	-0.330428	0.439088	0.637866	0.680205	0.484859	-0.268311	0.0554952	-0.346033	0.246278	-0.292759	-0.48584
mz_252	-0.320867	0.0308665	0.185459	-0.397684	-0.0235895	0.0379465	0.549821	0.470759	0.350297	-0.0791241	0.528196	0.373009	0.0897801	-0.289531	-0.60358	-0.149242	-0.262658	-0.422884	-0.36855	-0.388611	-0.3923	-0.304886	-0.212301	-0.291096	-0.282187	-0.035038	0.453655	0.0795614	-0.18519	-0.197186	0.180793	-0.301673	-0.440997	-0.429868	-0.408903	-0.456084	-0.316017	-0.284277	-0.170172	0.0742176	0.201993	0.340475	0.290486	-0.148823	-0.192848	-0.2515	0.164663	-0.408907	-0.336421
mz_253	-0.706842	-0.820507	-0.542109	-0.0263351	0.724805	-0.886645	0.132564	-0.607749	0.443486	-0.787336	-0.307729	-0.394141	-0.896276	0.0773241	-0.0456473	0.137548	0.0660798	-0.164659	-0.258979	-0.163536	-0.245194	-0.519338	-0.569367	0.056539	0.0882373	0.166708	0.268542	0.285552	0.823224	0.86552	0.144214	-0.110444	-0.102283	-0.0318697	-0.120849	-0.0180055	0.0508816	-0.164541	-0.147485	0.0296504	0.329547	0.278054	-0.120123	-0.0474069	0.605113	-0.723235	-0.495072	-0.210551	-0.118812
mz_254	-0.511747	-0.627347	-0.702938	0.215992	0.78659	-0.716722	0.301016	-0.401006	0.509202	-0.703476	-0.112525	-0.268643	-0.775409	0.0550436	-0.24217	-0.105045	0.0467092	-0.259852	-0.447235	-0.25495	-0.340145	-0.559401	-0.59367	-0.0537184	-0.0677782	0.0438909	0.166229	0.445657	0.690694	0.756737	0.283511	-0.246204	-0.245528	-0.167122	-0.223945	-0.164163	-0.080908	-0.222142	-0.15479	0.165525	0.491853	0.41264	0.111202	-0.231015	0.690582	-0.671662	-0.368776	-0.356608	-0.343313
mz_255	-0.787055	-0.922651	-0.831581	0.270033	0.923372	-0.905415	0.181868	-0.515569	0.631464	-0.911775	-0.155268	-0.562059	-0.952308	0.0607567	0.0182515	0.231285	0.354909	-0.00489728	-0.192741	-0.00847852	-0.0246844	-0.309908	-0.603081	0.175354	0.202158	0.126292	0.0511746	0.173722	0.699164	0.799796	0.153735	-0.0141082	0.105347	0.149102	0.0272654	0.0796496	0.129965	0.0319695	0.129716	-0.032197	0.264464	0.154333	-0.159648	0.228239	0.757378	-0.601672	-0.334011	0.00710126	0.071528
mz_256	-0.722493	-0.816577	-0.659836	0.0738492	0.818654	-0.833321	0.282069	-0.359583	0.638253	-0.775441	-0.0257992	-0.423128	-0.89069	0.0128472	-0.227193	0.147092	0.221429	-0.128935	-0.376894	-0.0703205	-0.180949	-0.622032	-0.677081	0.0490236	0.025392	0.00615545	0.0908222	0.498021	0.804089	0.875363	0.410064	-0.189403	-0.0668701	-0.0121433	-0.0889307	-0.0588846	0.028847	-0.115982	-0.0852028	0.206055	0.404246	0.275517	-0.019445	0.0156014	0.785829	-0.607896	-0.291627	-0.191299	-0.237662
mz_257	-0.291137	-0.386122	-0.589309	0.141376	0.679901	-0.458578	-0.380385	-0.580082	0.103991	-0.402008	-0.428119	-0.570903	-0.556876	0.347943	0.111792	0.296103	0.363453	0.346808	-0.299471	0.297337	0.161329	-0.457327	-0.124684	0.412254	0.374283	0.464403	-0.311319	0.117098	0.53892	0.618373	0.0242349	0.206791	0.32253	0.401106	0.349886	0.413066	0.459594	0.278458	0.0590077	0.240772	-0.074478	-0.143381	-0.342309	-0.0172614	0.556019	-0.17975	-0.428123	0.109573	0.120826
mz_258	-0.66783	-0.857134	-0.539891	0.0576409	0.668077	-0.785964	0.193084	-0.376048	0.470241	-0.716864	-0.108963	-0.473163	-0.795075	-0.00534414	0.118472	0.229361	0.284849	0.106601	-0.0328436	0.0124096	0.0354586	-0.248714	-0.458681	0.0111368	0.0502656	-0.124411	0.311574	0.302905	0.518253	0.654751	0.323403	-0.15634	0.108209	0.101465	-0.0171145	-0.0095626	0.0153991	-0.0100394	0.101896	0.0176775	0.250508	0.217932	-0.00375274	0.220969	0.738225	-0.333937	0.050175	0.146605	-0.017917
mz_259	-0.448145	-0.514708	-0.495563	-0.0021613	0.650968	-0.58451	0.286825	-0.17939	0.620097	-0.703977	0.112477	-0.155686	-0.61811	0.199283	-0.184878	0.0375098	-0.0133954	-0.304691	-0.515082	-0.335336	-0.366955	-0.495169	-0.554849	-0.0564594	-0.0712564	0.262936	0.0212986	0.322149	0.548524	0.573947	-0.0716822	-0.0925059	-0.160186	-0.176815	-0.311457	-0.231009	-0.118178	-0.246983	-0.13934	0.0336457	0.295339	0.239065	-0.0726201	-0.29363	0.625045	-0.439655	-0.326968	-0.196059	-0.213624
mz_260	-0.538611	-0.500462	-0.453287	0.12302	0.535937	-0.59241	0.272068	-0.147324	0.506733	-0.472593	0.0915089	-0.135688	-0.549996	-0.398959	-0.503445	-0.108901	-0.0186454	-0.364209	-0.639882	-0.0842825	-0.300139	-0.620744	-0.616772	0.0500979	0.0337605	-0.0557651	0.0204244	0.300942	0.615689	0.596134	0.323513	-0.226021	-0.235434	-0.166976	-0.107055	-0.0505321	0.0152515	-0.141394	-0.344183	0.255353	0.343416	0.297138	0.0243177	-0.00978986	0.305354	-0.623129	-0.361641	-0.591979	-0.348932
mz_261	0.159037	0.30511	0.379866	-0.342833	-0.305098	0.187383	-0.111182	-0.193046	-0.411541	0.295357	-0.326709	-0.0763036	0.153966	0.169294	-0.0938771	-0.145373	0.151469	-0.0814865	0.221159	0.0114866	0.133662	0.285454	0.334079	0.0817784	0.0231322	0.0317142	0.151862	0.00590044	0.147002	0.0272364	0.482202	0.17687	-0.120412	-0.0311546	0.0661224	0.0385516	0.0557409	0.0825833	-0.177977	0.138982	0.0334323	-0.0234587	0.0791308	0.208287	-0.243603	-0.25948	-0.0363671	-0.167167	-0.137411
mz_262	0.364944	0.729464	0.616434	-0.365938	-0.596439	0.650214	-0.13413	0.33762	-0.558845	0.762869	0.041565	0.452234	0.734788	-0.0911866	-0.134408	-0.124106	-0.260528	0.0153036	-0.085983	0.0252512	-0.00073012	-0.00993687	0.435138	-0.0876926	-0.110753	0.0569828	0.140352	-0.331914	-0.604914	-0.651227	-0.0580823	-0.069794	-0.149605	-0.105525	0.0204763	-0.0308993	-0.0145447	0.0409243	-0.241303	0.249705	-0.220294	-0.023033	0.181692	-0.135541	-0.746094	0.305825	0.206699	-0.170423	-0.157947
mz_263	0.345231	0.384952	0.317223	-0.0234326	-0.41299	0.394164	0.662452	0.628762	0.0482112	0.33535	0.531756	0.722827	0.405151	-0.176369	-0.375232	-0.639101	-0.465221	-0.532699	0.107964	-0.651576	-0.508753	0.120692	-0.106299	-0.768298	-0.795495	-0.707066	0.404802	0.429187	-0.429898	-0.463044	0.303739	-0.628754	-0.698405	-0.730334	-0.704086	-0.799349	-0.80512	-0.606854	-0.244934	0.134855	0.566193	0.594375	0.779131	-0.446091	-0.169836	-0.00317976	0.515121	-0.301108	-0.617969
mz_264	0.595485	0.599549	0.437736	0.0978408	-0.622353	0.479621	0.122256	0.204051	-0.600137	0.716352	-0.0822748	0.603186	0.599116	-0.315399	-0.0972256	-0.711598	-0.448731	-0.281744	0.170978	-0.326194	-0.245377	0.303474	0.265231	-0.496934	-0.483963	-0.61178	0.363049	-0.0112345	-0.49374	-0.548127	0.208217	-0.4493	-0.522641	-0.486987	-0.323164	-0.366683	-0.466171	-0.337451	-0.391112	0.194199	0.33094	0.445446	0.621612	-0.302145	-0.57169	0.0480828	0.342291	-0.383819	-0.467745
mz_265	-0.249426	-0.322649	-0.589422	0.322357	0.582178	-0.417132	0.417164	-0.0940086	0.426086	-0.488624	0.10203	0.0600911	-0.408668	-0.0146734	-0.158889	-0.234389	-0.199248	-0.344353	-0.586489	-0.389685	-0.43705	-0.457403	-0.50699	-0.22538	-0.217352	0.0232721	0.237813	0.215829	0.227229	0.328422	-0.0499488	-0.342735	-0.329104	-0.313033	-0.378422	-0.328606	-0.255829	-0.299112	-0.16608	0.0613718	0.420733	0.463186	0.256995	-0.444011	0.462839	-0.370645	-0.154141	-0.381744	-0.406919
mz_266	-0.00886264	-0.229281	-0.0326465	0.0250413	0.0449415	-0.127436	0.466633	0.248418	0.197358	-0.139969	0.28476	0.0017848	-0.135046	-0.124624	-0.050453	-0.0648004	-0.0164704	0.0189333	0.0312686	-0.0849668	-0.0453095	-0.106979	-0.157602	-0.304808	-0.293566	-0.444145	0.386007	0.450161	0.00169597	0.147713	0.508766	-0.327334	-0.106385	-0.1856	-0.20095	-0.333728	-0.284225	-0.216084	0.212364	-0.0745565	0.36373	0.275556	0.33072	-0.198116	0.466932	0.158208	0.515841	0.054578	-0.315696
mz_267	-0.630243	-0.720528	-0.577399	0.167242	0.691501	-0.797501	0.402238	-0.355695	0.428881	-0.588513	-0.108559	-0.29277	-0.763891	0.0300558	-0.0767828	0.121637	0.14839	-0.134857	-0.320291	-0.110009	-0.175683	-0.574594	-0.702137	-0.0444181	-0.0424293	-0.0342728	0.131133	0.213374	0.666857	0.78116	0.340358	-0.255056	-0.125113	-0.0736037	-0.121772	-0.161908	-0.0553026	-0.23568	-0.00966336	0.103467	0.560159	0.326471	0.0293603	-0.145801	0.633703	-0.57951	-0.288772	-0.219304	-0.306853
mz_268	-0.244797	-0.427856	-0.0729965	-0.248429	0.238052	-0.471091	-0.378027	-0.675317	-0.120937	-0.315629	-0.598062	-0.432739	-0.473134	0.533694	0.586466	0.32423	0.246478	0.248277	0.32745	0.0324134	0.176169	0.102641	-0.00400393	0.129139	0.149323	0.236847	0.0786489	-0.0138824	0.448674	0.45418	-0.143335	0.204663	0.267169	0.255944	0.0942096	0.188564	0.147691	0.0735175	-0.0535311	-0.00854325	-0.0806677	-0.0998095	-0.288135	0.169282	0.377868	-0.140225	-0.19141	0.434416	0.23834
mz_269	-0.540214	-0.622275	-0.671429	0.30692	0.680336	-0.741225	0.200899	-0.586764	0.370316	-0.665548	-0.320647	-0.189261	-0.739732	-0.052957	-0.0439497	-0.209473	-0.0603291	-0.399864	-0.282364	-0.335598	-0.362039	-0.276991	-0.578835	-0.0792138	-0.0553995	-0.0396363	0.309571	0.193677	0.635907	0.637585	0.0553657	-0.246666	-0.312034	-0.204265	-0.263336	-0.112472	-0.130436	-0.205566	-0.355315	0.0966585	0.40913	0.460454	0.158508	0.00609205	0.401718	-0.84575	-0.477051	-0.425151	-0.247494
mz_270	-0.352262	-0.601462	-0.425267	0.103722	0.509	-0.560544	-0.0741183	-0.467413	0.205602	-0.539815	-0.293503	-0.736872	-0.638324	0.149271	0.0839569	0.258979	0.608224	0.336221	0.168767	0.310022	0.377029	0.100045	-0.0552156	0.365081	0.376524	0.123845	-0.0979687	0.14702	0.573792	0.656955	0.497324	0.306939	0.359571	0.364011	0.339535	0.281781	0.33723	0.255761	0.428045	-0.153767	0.0992596	-0.159563	-0.311004	0.350467	0.659906	-0.234828	-0.0701778	0.253439	0.24043
mz_271	-0.687884	-0.815821	-0.573118	0.0559033	0.732632	-0.816447	0.00106948	-0.51166	0.494143	-0.818172	-0.209724	-0.63575	-0.835281	-0.0491877	-0.151593	0.282904	0.369438	0.0821567	-0.213333	0.148587	0.0680802	-0.288083	-0.361074	0.38568	0.438686	0.353887	-0.0576479	0.0523971	0.738827	0.789158	0.178155	0.240923	0.209917	0.242447	0.208753	0.249272	0.352672	0.122197	0.239928	-0.189624	0.103841	-0.05984	-0.445481	0.210786	0.568733	-0.547616	-0.459813	-0.0543152	0.235171
mz_272	-0.78468	-0.892387	-0.781031	0.235025	0.884725	-0.939699	0.235891	-0.51496	0.666097	-0.900953	-0.140203	-0.377211	-0.950436	0.0291052	-0.0271109	0.151734	0.109466	-0.244807	-0.377768	-0.173091	-0.261039	-0.513824	-0.777194	0.0650112	0.0831299	0.128873	0.0737936	0.226582	0.802974	0.851675	-0.00990896	-0.132408	-0.0714341	-0.01976	-0.145027	-0.0298072	0.0146582	-0.144698	-0.140235	0.030053	0.338662	0.263898	-0.116266	0.036696	0.673544	-0.72788	-0.523699	-0.20991	-0.0958283
mz_273	-0.729308	-0.818682	-0.73306	0.161542	0.866273	-0.906089	0.132718	-0.612728	0.53247	-0.843309	-0.274995	-0.503457	-0.931307	0.0888456	-0.0423095	0.161265	0.226908	-0.167587	-0.400895	-0.0657551	-0.143174	-0.47354	-0.630015	0.191563	0.192136	0.233151	0.0700024	0.204767	0.865826	0.907685	0.149443	-0.00769612	-0.00924354	0.0641569	-0.0231102	0.0782575	0.144079	-0.026782	-0.129833	0.0689909	0.286809	0.192352	-0.169372	0.097864	0.675704	-0.741558	-0.533685	-0.235382	-0.0993704
mz_274	-0.425048	-0.579154	-0.620708	0.322434	0.625379	-0.666305	-0.0566451	-0.711198	0.210515	-0.636916	-0.488578	-0.564284	-0.716271	0.0548453	0.180799	0.159498	0.213087	-0.0682421	-0.266411	0.168131	0.0648008	-0.211294	-0.334687	0.369259	0.372638	0.272095	0.0848985	0.0385559	0.779662	0.810566	0.112204	0.19777	0.129974	0.222508	0.203614	0.324879	0.329573	0.195015	-0.0392532	-0.124045	0.0569889	-0.0077422	-0.217838	0.226029	0.472498	-0.596448	-0.568945	-0.246847	0.0190767
mz_275	-0.399531	-0.481047	-0.548851	0.314795	0.558217	-0.574822	0.116638	-0.47453	0.172036	-0.485888	-0.312191	-0.460979	-0.556852	-0.160146	-0.12073	0.00822871	0.264151	-0.0213013	-0.298192	0.140757	0.0743807	-0.173611	-0.253362	0.299966	0.334295	0.184682	0.0873847	-0.103305	0.524632	0.599753	0.330853	0.116525	0.038839	0.123725	0.194066	0.187961	0.267567	0.119527	0.146141	-0.130909	0.233585	0.0842311	-0.146121	0.12556	0.338291	-0.551348	-0.363385	-0.327596	-0.0308017
mz_276	0.326273	0.431272	-0.104371	0.250451	-0.0372461	0.409607	0.200854	0.389395	-0.128706	0.450827	0.262786	0.45723	0.368273	0.0781162	-0.063565	-0.301758	-0.225449	-0.0177912	-0.20114	-0.184538	-0.215098	-0.29569	-0.0609774	-0.429541	-0.514186	-0.384742	0.0274361	0.264326	-0.496765	-0.398762	0.079594	-0.554271	-0.288164	-0.252299	-0.251841	-0.327232	-0.360303	-0.185886	-0.223646	0.543356	0.245567	0.364349	0.620669	-0.435388	-0.00657589	0.316925	0.402468	-0.0635877	-0.505034
mz_277	-0.490558	-0.217174	-0.28552	0.0214403	0.341572	-0.325989	0.15961	-0.280464	0.253456	-0.329605	-0.121369	-0.0981527	-0.342508	-0.142653	-0.171078	0.0939908	-0.0953371	-0.423716	-0.539601	-0.00536128	-0.191598	-0.451919	-0.420994	0.202611	0.157903	0.249123	0.228061	-0.028768	0.506134	0.442815	0.0396503	-0.00158027	-0.178451	-0.0355656	-0.00923272	0.124981	0.158146	0.0904655	-0.41544	0.122687	-0.0191041	0.0979304	0.0133601	0.220883	-0.0492552	-0.664955	-0.560006	-0.598284	-0.236678
mz_278	-0.367466	-0.392721	0.191366	-0.554183	0.0680702	-0.398463	-0.197241	-0.342642	-0.0136825	-0.126312	-0.283774	-0.287377	-0.392117	0.181619	-0.0450188	0.120029	0.299097	0.140148	0.39725	-0.0303749	0.0817671	-0.00534141	-0.0376793	-0.0304618	-0.040272	-0.144363	0.0758443	0.32337	0.448576	0.375517	0.464929	-0.0275308	0.0257876	0.0477556	0.0035471	-0.00493943	-0.00494013	-0.0801011	-0.177578	0.321931	0.169235	0.0772303	-0.0961351	0.271165	0.230498	-0.286942	0.0342122	0.243891	0.0316828
mz_279	-0.00939068	-0.204165	-0.256611	0.159771	0.263725	-0.367092	0.15933	-0.102824	0.189012	-0.13899	-0.00430524	0.20561	-0.287392	-0.203583	-0.29937	-0.478479	-0.324566	-0.392875	-0.496015	-0.397768	-0.524213	-0.518035	-0.472529	-0.360552	-0.379451	-0.344737	0.0274823	0.524513	0.375839	0.348867	0.148264	-0.510491	-0.444084	-0.441042	-0.415594	-0.338767	-0.354518	-0.472721	-0.588679	0.424287	0.544979	0.545113	0.29726	-0.526676	0.322023	-0.324075	-0.128067	-0.484967	-0.587327
mz_280	-0.0762995	-0.143034	-0.37014	0.112156	0.379492	-0.137572	-0.573486	-0.52204	-0.110907	-0.232159	-0.470896	-0.673921	-0.259855	0.332829	0.231601	0.182899	0.656163	0.494626	0.209619	0.388693	0.522381	0.42199	0.395161	0.529027	0.513916	0.387914	-0.293583	-0.160973	0.157311	0.170936	0.0935785	0.522211	0.496379	0.54074	0.502918	0.547739	0.509567	0.580061	0.262063	0.0468442	-0.369184	-0.352649	-0.353042	0.554765	0.275628	-0.0100188	-0.0619029	0.406426	0.490997
mz_281	-0.224795	0.0646806	-0.109903	-0.171005	0.22302	-0.0117597	0.138537	0.30019	0.20727	0.119699	0.329122	0.264186	0.0548647	-0.138987	-0.442244	-0.211733	-0.0334921	-0.135424	-0.52386	-0.230198	-0.259009	-0.459032	-0.251673	-0.259229	-0.320362	-0.167037	-0.00214134	0.187384	-0.201454	-0.189915	0.167631	-0.445294	-0.272103	-0.249562	-0.25252	-0.274079	-0.234324	-0.145219	-0.480817	0.724653	0.195647	0.374453	0.341555	-0.12208	0.0149448	-0.0341197	0.279665	-0.211001	-0.424763
mz_282	-0.283022	-0.211841	-0.207461	-0.0577024	0.295337	-0.356837	0.403683	-0.321618	0.122669	-0.282628	-0.20749	0.00907746	-0.41671	0.153959	-0.189267	-0.170328	-0.174339	-0.454731	-0.253278	-0.344071	-0.390655	-0.452716	-0.40836	-0.191561	-0.242409	-0.0209798	0.463892	0.372621	0.572245	0.564234	0.408504	-0.283541	-0.470437	-0.331311	-0.327684	-0.294401	-0.210172	-0.314899	-0.324952	0.157281	0.504619	0.443378	0.327408	-0.275343	0.260407	-0.728924	-0.37422	-0.537765	-0.555515
mz_283	-0.601078	-0.44053	-0.456474	-0.0627921	0.63344	-0.554005	0.403827	-0.226447	0.429875	-0.470757	-0.00359542	-0.134073	-0.594902	0.189147	-0.340737	0.0460127	0.092482	-0.27421	-0.417442	-0.259121	-0.314559	-0.654023	-0.596999	-0.0715163	-0.123586	0.152499	0.115125	0.265099	0.569031	0.610604	0.334153	-0.238407	-0.292047	-0.179872	-0.226644	-0.248241	-0.0942078	-0.248636	-0.154594	0.289033	0.502137	0.348958	0.110425	-0.214188	0.444188	-0.683537	-0.376528	-0.345126	-0.392169
mz_284	-0.762417	-0.85008	-0.675854	0.114506	0.83252	-0.941809	0.252628	-0.474152	0.643974	-0.84779	-0.116252	-0.354844	-0.921497	-0.0127251	-0.215561	0.0625559	0.130827	-0.287765	-0.422895	-0.224337	-0.298951	-0.527395	-0.746133	0.0540252	0.071404	0.143089	0.0151925	0.24049	0.840671	0.857067	0.117454	-0.118858	-0.140116	-0.0931556	-0.175622	-0.0921704	-0.00551187	-0.218705	-0.167843	0.073762	0.436133	0.292201	-0.151497	-0.0373755	0.633127	-0.788221	-0.530805	-0.297394	-0.15082
mz_285	-0.863378	-0.860763	-0.527909	-0.0740809	0.746756	-0.951522	0.188258	-0.496554	0.597681	-0.810919	-0.153813	-0.295098	-0.887962	-0.0063334	-0.142514	0.163469	0.062006	-0.297092	-0.378204	-0.246562	-0.316013	-0.544053	-0.742448	0.0438867	0.0791998	0.206532	0.102575	0.113004	0.798041	0.789937	-0.0355034	-0.11328	-0.132991	-0.0864969	-0.192743	-0.0789223	-0.00068394	-0.226045	-0.26268	0.0781444	0.332506	0.26549	-0.207911	0.0270016	0.475554	-0.795491	-0.56698	-0.256117	-0.0838396
mz_286	-0.79639	-0.893401	-0.724899	0.143599	0.865022	-0.951137	0.228527	-0.594168	0.533665	-0.810413	-0.259018	-0.419819	-0.974445	0.163247	0.0557597	0.207861	0.176454	-0.144462	-0.254205	-0.137595	-0.199516	-0.562394	-0.752518	0.025382	0.0251823	0.0703197	0.151433	0.286749	0.841018	0.917773	0.166499	-0.192304	-0.0686791	0.0099396	-0.117689	-0.0458465	0.00720374	-0.15674	-0.132129	0.142508	0.420478	0.300814	-0.0446885	0.0218621	0.728539	-0.727507	-0.462654	-0.129723	-0.171332
mz_287	-0.82968	-0.913588	-0.718512	0.195957	0.822537	-0.920892	0.228067	-0.522122	0.599633	-0.90078	-0.173491	-0.399501	-0.904567	-0.050618	0.0244924	0.182759	0.133271	-0.162798	-0.232552	-0.140087	-0.176069	-0.340489	-0.650259	0.0904335	0.155181	0.142348	0.230064	0.046239	0.653364	0.727525	-0.035747	-0.0807341	-0.0237705	0.0239718	-0.0932419	0.00505438	0.0486706	-0.0821102	0.000193573	-0.123554	0.25969	0.236166	-0.139044	0.157057	0.554576	-0.699262	-0.433173	-0.133391	0.048693
mz_288	-0.832963	-0.872591	-0.694016	0.167582	0.829225	-0.936566	0.363531	-0.412477	0.616905	-0.789452	-0.0770032	-0.282513	-0.889004	-0.069033	-0.113596	0.158756	0.0601801	-0.242542	-0.443502	-0.17615	-0.291024	-0.658373	-0.833505	-0.00721536	0.0206706	0.0688316	0.153876	0.159266	0.727003	0.811427	0.0918223	-0.251224	-0.140671	-0.0831539	-0.168867	-0.118567	-0.0306699	-0.229211	-0.126672	0.0752481	0.453744	0.339899	-0.0540668	-0.0666474	0.592355	-0.716547	-0.456917	-0.287196	-0.209032
mz_289	-0.528665	-0.522675	-0.300268	-0.148929	0.498389	-0.643901	-0.06468	-0.403907	0.367347	-0.467014	-0.175269	-0.13429	-0.612689	0.140888	-0.124037	0.192568	-0.0868233	-0.211467	-0.397184	-0.157059	-0.344314	-0.716941	-0.59304	0.0642275	0.0525087	0.300064	-0.212081	0.187332	0.726761	0.666238	-0.222499	-0.0752201	-0.0910609	-0.041449	-0.119493	0.0102478	0.0698887	-0.238433	-0.363619	0.226486	0.198366	0.106316	-0.298158	-0.241226	0.306139	-0.529764	-0.693442	-0.216182	-0.0980297
mz_290	-0.247512	-0.543789	-0.511122	0.184176	0.588579	-0.572779	0.0859972	-0.242381	0.444814	-0.596799	-0.0118738	-0.406464	-0.611908	0.00277344	-0.262969	-0.0272847	0.235638	0.0234129	-0.288303	-0.017863	-0.0803753	-0.29582	-0.306969	0.130213	0.141739	0.110938	-0.227304	0.37335	0.582564	0.637189	0.268304	0.052249	0.0565376	0.0253779	0.00865096	0.00119179	0.0966272	-0.0941986	0.180069	-0.049594	0.319739	0.0841315	-0.225196	-0.204062	0.70635	-0.273982	-0.212736	-0.0738481	-0.0345828
mz_291	-0.356574	-0.277268	-0.475636	0.0697672	0.56904	-0.341561	-0.391059	-0.549641	0.0886793	-0.37555	-0.409874	-0.460967	-0.428324	0.455612	0.272864	0.506537	0.254557	0.269317	-0.273926	0.293296	0.156029	-0.410783	-0.126084	0.497314	0.471647	0.741521	-0.326767	-0.240403	0.421449	0.465722	-0.401192	0.367262	0.3733	0.461906	0.366438	0.473386	0.526073	0.335132	0.0930142	0.0361925	-0.305864	-0.323271	-0.494892	0.0534572	0.260234	-0.185713	-0.650516	0.140683	0.307703
mz_292	0.217676	0.211788	0.240508	-0.00831449	-0.257606	0.171248	-0.369966	-0.152096	-0.390709	0.194802	-0.28625	-0.214716	0.252463	0.132284	0.320729	0.320037	0.20304	0.333803	0.171926	0.385773	0.426391	0.381369	0.413721	0.46778	0.527224	0.550692	-0.3687	-0.768791	-0.143428	-0.153802	-0.404692	0.623385	0.446338	0.403275	0.458581	0.417893	0.45762	0.322402	0.442053	-0.495093	-0.405942	-0.573215	-0.60598	0.12993	-0.357391	0.263602	-0.250237	0.242526	0.545122
mz_293	-0.589457	-0.292466	-0.33567	-0.0136504	0.429331	-0.419277	0.195393	-0.328581	0.190598	-0.33586	-0.186082	-0.0239329	-0.35503	-0.0238947	0.058171	0.124255	-0.125887	-0.334053	-0.518728	-0.142734	-0.220132	-0.443696	-0.459223	0.0415622	0.0379439	0.249875	0.425386	-0.233264	0.284528	0.307149	-0.153615	-0.153044	-0.192672	-0.0765028	-0.126975	-0.0085165	0.0271448	0.00577954	-0.422772	0.164331	0.0394589	0.246702	0.109048	0.125033	-0.0199116	-0.578802	-0.384706	-0.428226	-0.246542
mz_294	-0.233505	-0.376663	-0.630571	0.310726	0.599692	-0.379888	0.0402535	-0.444135	0.221004	-0.449612	-0.26775	-0.172341	-0.536173	0.49684	0.282899	0.050282	0.0267998	0.0151019	0.066354	-0.212301	-0.197479	-0.276593	-0.339172	-0.127004	-0.155223	0.0503129	0.0684722	0.332366	0.342413	0.434537	-0.125342	-0.204461	-0.0766257	0.00659237	-0.163306	-0.0827147	-0.107303	-0.128089	0.00109486	0.13303	0.253786	0.247122	0.15905	-0.227999	0.57345	-0.308489	-0.28575	0.148087	-0.0857747
mz_295	-0.354617	-0.332784	-0.462601	0.197451	0.492852	-0.495086	0.512864	-0.0361093	0.566201	-0.468647	0.207217	0.326317	-0.43802	-0.169695	-0.444159	-0.43516	-0.435339	-0.746637	-0.669211	-0.675548	-0.77574	-0.605326	-0.780502	-0.409221	-0.417863	-0.125614	0.156919	0.35406	0.417207	0.370923	-0.108191	-0.522462	-0.645458	-0.603115	-0.648499	-0.529287	-0.47823	-0.590857	-0.57735	0.236348	0.613353	0.644023	0.323109	-0.517481	0.259159	-0.707016	-0.406926	-0.690101	-0.588154
mz_296	-0.536118	-0.724802	-0.604055	0.069397	0.741567	-0.727181	0.139175	-0.472461	0.476835	-0.732174	-0.184489	-0.477391	-0.847292	0.251352	-0.0553589	0.186661	0.23074	0.00454865	-0.150933	-0.045989	-0.117634	-0.491787	-0.480856	0.0821299	0.0615865	0.114982	0.0569124	0.51012	0.787489	0.865128	0.321458	-0.0656727	0.0118974	0.0678752	-0.0338598	0.000761322	0.0797085	-0.0885015	0.0718563	0.0760157	0.336758	0.172308	-0.0909204	-0.0872245	0.818172	-0.505236	-0.344598	-0.0149688	-0.110794
mz_297	-0.851256	-0.780232	-0.509089	0.0805552	0.638339	-0.81363	0.303187	-0.445897	0.449163	-0.705107	-0.173628	-0.361594	-0.75555	-0.15349	-0.074616	0.274751	0.144296	-0.168673	-0.241429	-0.00777513	-0.0880024	-0.384579	-0.597875	0.187967	0.250314	0.213217	0.251389	-0.172833	0.621156	0.683834	0.0980156	-0.00385243	-0.0272316	0.0582578	0.0286022	0.0564286	0.154658	-0.0361702	0.0735735	-0.184752	0.24751	0.137482	-0.196821	0.212358	0.286223	-0.746257	-0.505899	-0.271218	0.0314938
mz_298	-0.719152	-0.852029	-0.716209	0.189975	0.83466	-0.913671	0.306229	-0.434026	0.6618	-0.829252	-0.0761677	-0.323544	-0.928688	-0.00895833	-0.184327	0.0526051	0.0870088	-0.28302	-0.396325	-0.216541	-0.323863	-0.597918	-0.795502	-0.0162356	-0.0155222	0.0140723	0.0491391	0.397331	0.847335	0.886439	0.183988	-0.222667	-0.165914	-0.113544	-0.20285	-0.12605	-0.0598398	-0.248309	-0.172376	0.121138	0.484745	0.342049	-0.0409016	-0.0872533	0.715206	-0.738486	-0.472773	-0.285934	-0.234401
mz_299	-0.595239	-0.731423	-0.607259	0.309066	0.62502	-0.785393	0.521916	-0.226606	0.613944	-0.684264	0.0728971	0.140952	-0.706268	-0.230329	-0.161898	-0.210769	-0.363714	-0.520513	-0.357782	-0.547937	-0.646991	-0.57064	-0.885484	-0.395231	-0.328895	-0.246746	0.317982	0.287535	0.487708	0.539967	-0.140726	-0.56269	-0.474911	-0.445525	-0.537912	-0.439355	-0.420584	-0.572052	-0.296831	0.00785308	0.636981	0.628502	0.238738	-0.386234	0.422954	-0.698084	-0.377986	-0.426339	-0.36374
mz_300	-0.680926	-0.778373	-0.67479	0.239248	0.745384	-0.828423	0.270126	-0.554254	0.528925	-0.832873	-0.228487	-0.4499	-0.869957	0.0809836	0.0940151	0.211331	0.154328	-0.257038	-0.298923	-0.0577624	-0.122486	-0.357525	-0.655027	0.166277	0.166874	0.171693	0.181211	0.157138	0.838732	0.881379	0.108798	0.0139307	-0.0189234	0.0482518	-0.047988	0.0506527	0.0965776	-0.0248568	-0.0608519	-0.12261	0.258016	0.150456	-0.112797	0.164183	0.611707	-0.728527	-0.528043	-0.247896	-0.0993855
mz_301	-0.469902	-0.639998	-0.476788	0.17824	0.540421	-0.708836	0.309597	-0.341249	0.364221	-0.501163	-0.124042	-0.214269	-0.670089	-0.00616652	0.0838823	0.0231224	0.0460914	-0.209526	-0.277068	-0.14404	-0.188116	-0.431592	-0.658346	-0.137642	-0.151935	-0.230884	0.202035	0.350118	0.62868	0.698834	0.283171	-0.31882	-0.140104	-0.124189	-0.196209	-0.166995	-0.156792	-0.227078	-0.251307	0.185474	0.465308	0.359337	0.151829	-0.0514083	0.614595	-0.456729	-0.140529	-0.195717	-0.375852
mz_302	-0.0764938	-0.191423	-0.355001	0.539026	0.153613	-0.20852	0.129419	-0.142352	0.219862	-0.292901	-0.0236808	0.296545	-0.13946	-0.183173	0.237276	-0.133586	-0.502062	-0.395124	-0.11337	-0.317301	-0.413916	-0.0459354	-0.413656	-0.156802	-0.066126	0.0162268	0.0221783	-0.279909	0.00968739	-0.00900636	-0.842756	-0.153957	-0.205068	-0.203731	-0.274897	-0.0992906	-0.19589	-0.267244	-0.129662	-0.381009	0.0549262	0.159631	-0.0100984	-0.240375	-0.170354	-0.26392	-0.508007	-0.237638	0.0993136
mz_303	-0.316782	-0.540745	-0.384638	0.409568	0.292847	-0.513854	0.227335	-0.0131067	0.514653	-0.521331	0.203126	0.126307	-0.366717	-0.685609	-0.34962	-0.338246	-0.292274	-0.360242	-0.169207	-0.321357	-0.415442	-0.0268558	-0.452757	-0.144667	0.00775421	-0.215833	-0.0190139	-0.0622891	0.145662	0.118115	-0.332483	-0.205224	-0.242263	-0.294776	-0.26585	-0.170623	-0.201744	-0.349164	-0.00893512	-0.354227	0.291398	0.291302	-0.103928	-0.120665	0.00690897	-0.406365	-0.281394	-0.339434	0.134893
mz_304	-0.82647	-0.779899	-0.484695	-0.0604606	0.689028	-0.740121	0.514759	0.0499555	0.793328	-0.739845	0.370671	-0.193485	-0.672259	-0.219554	-0.336173	0.210592	0.123364	-0.174116	-0.495191	-0.162495	-0.22026	-0.567011	-0.708767	-0.0548096	-0.0176091	0.0335292	0.173315	0.165849	0.395948	0.505661	0.175099	-0.230412	-0.0755989	-0.112904	-0.203569	-0.237173	-0.0908543	-0.190558	0.0505672	0.0199208	0.335354	0.266542	-0.053072	0.00306371	0.559372	-0.394439	-0.0327957	-0.145644	-0.14885
mz_305	-0.225456	-0.231485	-0.4719	0.223696	0.453058	-0.37205	-0.245476	-0.647274	0.0241644	-0.295216	-0.514784	-0.362633	-0.455589	0.301984	0.231781	-0.0088158	0.238924	-0.121938	-0.119347	0.0241193	0.0398776	-0.0201479	-0.209917	0.218028	0.142195	0.143185	-0.097478	0.0960896	0.575664	0.504715	0.0494838	0.110535	0.0279861	0.147206	0.0893806	0.246218	0.163906	0.188092	-0.39307	0.305051	0.0111762	0.0426962	-0.0141678	0.321971	0.275662	-0.522809	-0.443414	-0.137187	-0.0760213
mz_306	0.00882293	0.080882	0.159392	-0.42998	0.0267076	0.0855961	0.0428128	0.100591	-0.113791	0.0765402	0.0345667	-0.15687	0.0495723	0.188182	-0.223253	-0.0572438	0.306386	0.273616	0.0521783	-0.0166807	0.162471	0.0674115	0.345272	-0.0620634	-0.0826241	0.012793	0.279792	0.198734	-0.176631	-0.0900223	0.602724	-0.0217622	0.00353666	-0.00904381	0.000759308	-0.142381	-0.0250975	0.0624096	0.165843	0.228412	0.10264	0.119042	0.163684	-0.0233891	0.236686	0.148535	0.535038	0.18632	-0.134676
mz_307	-0.355795	-0.19928	-0.0230081	-0.12441	0.136583	-0.301871	0.516156	0.31815	0.461981	-0.11234	0.450728	0.503032	-0.143898	-0.262442	-0.475076	-0.23613	-0.401304	-0.588145	-0.483427	-0.559064	-0.641661	-0.594271	-0.72406	-0.476948	-0.480474	-0.250652	-0.000973737	0.175998	0.133753	0.0737152	-0.107314	-0.552655	-0.540476	-0.562505	-0.586944	-0.581516	-0.511223	-0.630031	-0.504333	0.311068	0.543765	0.492577	0.23155	-0.443317	-0.0279616	-0.377119	-0.143292	-0.456736	-0.497117
mz_308	0.00746094	0.232848	0.67364	-0.571667	-0.525957	0.17379	0.058481	0.152919	-0.335472	0.380989	-0.0146095	0.475706	0.359956	-0.120076	-0.0222467	-0.0529115	-0.435339	-0.175177	0.124068	-0.286506	-0.242329	-0.0319664	0.115595	-0.301708	-0.228267	-0.017007	0.429934	-0.324811	-0.327807	-0.38576	-0.235979	-0.190186	-0.287147	-0.298423	-0.267575	-0.275647	-0.244332	-0.318683	-0.255315	-0.043222	0.0199382	0.160971	0.0794184	-0.230384	-0.618809	0.00475418	0.0552017	-0.119023	-0.0890401
mz_309	-0.433573	-0.490457	-0.158065	0.0942399	0.184347	-0.552683	0.542772	-0.0314259	0.450273	-0.49782	0.16326	0.28457	-0.361316	-0.499142	-0.186032	-0.267991	-0.491645	-0.665508	-0.344084	-0.538889	-0.573668	-0.202479	-0.625938	-0.340496	-0.224206	-0.19062	0.497518	-0.0600675	0.250224	0.226971	-0.245476	-0.35825	-0.477465	-0.513282	-0.534486	-0.431591	-0.410725	-0.512995	-0.312958	-0.31054	0.411412	0.486653	0.142032	-0.210633	-0.0166645	-0.588096	-0.252265	-0.555071	-0.257191
mz_310	-0.84327	-0.928914	-0.642669	0.110271	0.778489	-0.935658	0.304561	-0.494352	0.582706	-0.836572	-0.157647	-0.440676	-0.933261	0.0045886	-0.0295537	0.166276	0.266624	-0.15065	-0.0924692	-0.139375	-0.116714	-0.289124	-0.670809	0.0327977	0.0659773	-0.0192856	0.20915	0.186476	0.735166	0.79651	0.263809	-0.126392	-0.0532594	-0.00141567	-0.107692	-0.0716484	-0.0188411	-0.125102	0.0025509	-0.0078514	0.407822	0.27397	-0.0598044	0.23055	0.635437	-0.7401	-0.314319	-0.0854293	-0.0463616
mz_311	-0.742577	-0.799595	-0.672552	0.171388	0.788498	-0.751055	0.381777	-0.0833563	0.846363	-0.812295	0.284096	-0.281757	-0.78462	-0.160215	-0.393087	0.166299	0.15102	-0.177115	-0.411247	-0.103281	-0.24776	-0.595319	-0.741384	0.0506503	0.0612743	0.0547668	-0.126355	0.341359	0.613762	0.673818	0.145999	-0.149014	-0.0507626	-0.0412512	-0.116373	-0.104385	0.00444392	-0.16535	0.0952355	0.0155322	0.349733	0.182894	-0.146132	-0.0292303	0.64064	-0.511066	-0.328014	-0.172262	-0.0607676
mz_312	-0.72345	-0.863522	-0.705559	0.16898	0.827332	-0.932784	0.317828	-0.471378	0.62146	-0.818644	-0.122989	-0.318452	-0.937914	0.006816	-0.150966	-0.0145881	0.10737	-0.291976	-0.321385	-0.277654	-0.323594	-0.504404	-0.77208	-0.0827795	-0.0781087	-0.070009	0.145186	0.411968	0.818456	0.858936	0.249585	-0.274344	-0.209524	-0.155753	-0.254134	-0.179726	-0.129481	-0.273333	-0.217198	0.164018	0.536817	0.420433	0.0448886	-0.0445193	0.726243	-0.770847	-0.382703	-0.262671	-0.269348
mz_313	-0.474669	-0.393795	-0.277042	-0.100157	0.405547	-0.469636	0.390111	-0.108744	0.511667	-0.504569	0.125333	0.240184	-0.468602	-0.0379995	-0.298321	-0.112682	-0.46829	-0.583231	-0.487484	-0.535087	-0.691388	-0.714712	-0.664995	-0.308459	-0.304301	0.0526601	0.341154	0.372899	0.460311	0.428357	-0.183854	-0.412396	-0.502609	-0.441455	-0.52861	-0.385763	-0.3203	-0.482468	-0.461945	0.119519	0.369292	0.476522	0.183439	-0.442305	0.216035	-0.629104	-0.474953	-0.506421	-0.409407
mz_314	-0.625066	-0.784394	-0.769448	0.378915	0.803893	-0.82823	0.165628	-0.590893	0.376616	-0.72244	-0.321557	-0.46804	-0.835472	0.0679285	0.146152	0.235628	0.19123	0.0181741	-0.236999	0.0523752	-0.0466461	-0.441928	-0.577093	0.17932	0.21885	0.182438	0.0744299	0.0123525	0.668935	0.803696	0.0522789	-0.0415975	0.0765232	0.150288	0.0832646	0.116667	0.176894	-0.0197402	0.15566	-0.113333	0.309085	0.14585	-0.164053	-0.0173149	0.61077	-0.562103	-0.491169	-0.109075	-0.00285001
mz_315	-0.407314	-0.513899	-0.556596	0.547602	0.422066	-0.513945	0.627813	-0.0841357	0.5506	-0.575599	0.162489	0.0647305	-0.497775	-0.362719	-0.233757	-0.24658	-0.190269	-0.540838	-0.144756	-0.349772	-0.400657	-0.122484	-0.671989	-0.192269	-0.136363	-0.261958	0.191103	0.0874632	0.379306	0.395249	0.0392679	-0.277988	-0.384559	-0.336352	-0.333948	-0.30527	-0.290076	-0.356082	0.0393039	-0.321458	0.535968	0.389372	0.194739	-0.0754049	0.206793	-0.699013	-0.369699	-0.482901	-0.191065
mz_316	-0.432931	-0.397809	-0.2712	0.138486	0.296379	-0.542666	0.633646	-0.128335	0.273881	-0.282698	0.012449	0.387669	-0.397362	-0.243641	-0.279878	-0.431285	-0.435209	-0.635508	-0.223326	-0.689682	-0.686465	-0.413357	-0.723895	-0.5649	-0.508184	-0.377124	0.475643	0.113986	0.26708	0.278265	0.0733507	-0.670334	-0.717929	-0.642228	-0.647034	-0.632236	-0.588171	-0.70952	-0.408057	0.116658	0.820225	0.771933	0.458583	-0.455281	0.0486731	-0.782896	-0.265181	-0.591012	-0.563267
mz_317	0.134988	0.266185	0.451378	-0.374942	-0.331006	0.0972472	0.240425	0.110108	-0.199457	0.215614	0.00784498	0.370152	0.216865	-0.146899	-0.430938	-0.325249	-0.393782	-0.397925	-0.221705	-0.364455	-0.385643	-0.180711	0.0432929	-0.212448	-0.180462	0.100187	0.274353	-0.0787802	0.0159152	-0.067532	0.104527	-0.11122	-0.463744	-0.438492	-0.3119	-0.345838	-0.215227	-0.406996	-0.214109	-0.0856497	0.308873	0.247792	0.0773776	-0.510087	-0.377702	-0.294697	-0.195923	-0.535453	-0.337802
mz_318	0.141013	0.121499	0.0161228	0.083449	-0.0990739	0.00792192	0.0124916	-0.0893542	-0.0146873	0.00125067	-0.0782822	0.492607	0.0734495	-0.133292	-0.0776237	-0.567623	-0.57401	-0.5474	-0.0793118	-0.619903	-0.588682	0.0712408	-0.128157	-0.421037	-0.379192	-0.194096	0.250467	0.0808847	-0.0813579	-0.214696	-0.456638	-0.342823	-0.532116	-0.508215	-0.537371	-0.339982	-0.451996	-0.422007	-0.606501	0.0880942	0.182178	0.452924	0.316394	-0.314333	-0.294266	-0.337784	-0.213003	-0.384297	-0.22717
mz_319	0.0222385	0.252364	-0.141391	0.15412	0.080993	0.0575503	-0.200327	-0.369808	-0.46784	0.285773	-0.493383	0.0502205	0.115492	0.0425904	0.175459	-0.114797	-0.0917293	-0.00623351	-0.29968	0.0705244	0.00482412	-0.186664	0.0759239	0.0911501	0.0689043	0.167808	0.215058	-0.372327	-0.0858264	-0.0539299	-0.0695514	-0.0989773	-0.11071	0.0453114	0.123206	0.180932	0.150132	0.156951	-0.367667	0.334749	-0.0460644	0.149662	0.193046	-0.0195687	-0.316768	-0.214537	-0.229289	-0.336675	-0.227494
mz_320	-0.749284	-0.736995	-0.459504	-0.14743	0.701103	-0.865635	0.0356355	-0.59441	0.436912	-0.718926	-0.300131	-0.410179	-0.836889	0.131448	-0.025226	0.290563	0.103362	-0.201618	-0.496067	-0.0614227	-0.191494	-0.64607	-0.619853	0.20592	0.200619	0.377415	0.0828417	0.133397	0.896725	0.891789	0.0128818	0.0252948	-0.00770982	0.0555166	-0.0335182	0.0954754	0.183615	-0.0639995	-0.308298	0.132509	0.172231	0.119222	-0.286235	0.0265784	0.506403	-0.695885	-0.629108	-0.268886	-0.123396
mz_321	-0.642533	-0.551645	-0.389948	-0.110595	0.60339	-0.734846	0.124892	-0.413623	0.341208	-0.49442	-0.192996	-0.157543	-0.626207	0.0160648	-0.099338	0.157077	-0.0687744	-0.271909	-0.693126	-0.151461	-0.312356	-0.782462	-0.658375	0.0561553	0.0524344	0.297092	0.10072	0.0247941	0.661045	0.6792	-0.0669567	-0.164915	-0.145738	-0.0888598	-0.14005	-0.0422103	0.057227	-0.185	-0.440048	0.264941	0.262291	0.252571	-0.138371	-0.191885	0.333643	-0.59147	-0.531763	-0.409491	-0.308736
mz_322	-0.530808	-0.555652	-0.416998	0.00334208	0.55923	-0.638464	0.0289109	-0.378149	0.553928	-0.746612	-0.0768954	-0.318712	-0.631403	0.0885333	-0.0794563	0.22388	0.0629042	-0.299197	-0.444358	-0.108899	-0.190208	-0.298441	-0.480188	0.287897	0.305059	0.528017	-0.189401	-0.0565879	0.701812	0.630992	-0.336481	0.280792	0.0553362	0.0515503	-0.0446921	0.111051	0.189162	-0.0225794	-0.107363	-0.218431	-0.0119232	-0.0934199	-0.468463	0.048723	0.337451	-0.558882	-0.691769	-0.22185	0.143374
mz_323	-0.485034	-0.434798	-0.110818	-0.1776	0.270432	-0.530938	0.200402	-0.355367	0.206387	-0.397082	-0.2012	-0.0162864	-0.48387	-0.0244603	-0.203988	0.0582761	-0.221926	-0.318465	-0.157487	-0.256993	-0.379637	-0.489826	-0.436178	-0.0370468	0.0122856	0.210723	0.22492	0.0274417	0.565443	0.530583	-0.0382907	-0.105058	-0.282896	-0.19394	-0.194775	-0.13327	-0.0323841	-0.333634	-0.13825	-0.118502	0.327673	0.221013	-0.13683	-0.26687	0.0513861	-0.686254	-0.635254	-0.381776	-0.117771
mz_324	-0.599127	-0.675569	-0.658646	0.363163	0.64908	-0.707894	0.64784	-0.192136	0.526692	-0.582811	0.0653515	0.079651	-0.676378	-0.181315	-0.154805	-0.208104	-0.209458	-0.415156	-0.265044	-0.458386	-0.511813	-0.537465	-0.832119	-0.419905	-0.386719	-0.388061	0.454872	0.346003	0.407229	0.525278	0.208358	-0.644916	-0.479986	-0.405624	-0.473105	-0.462294	-0.429227	-0.489005	-0.185591	0.120944	0.732408	0.691328	0.4475	-0.285063	0.491483	-0.683273	-0.168513	-0.392479	-0.486293
mz_325	-0.655957	-0.66897	-0.337516	-0.126586	0.538942	-0.795136	0.241293	-0.232148	0.577968	-0.610875	0.0521746	0.0161594	-0.656928	-0.248576	-0.465525	-0.207718	-0.138773	-0.466878	-0.435263	-0.492899	-0.542848	-0.484267	-0.688348	-0.197685	-0.142644	-0.0166788	0.0443257	0.200645	0.579162	0.508792	-0.0279475	-0.302459	-0.381189	-0.376603	-0.421442	-0.320799	-0.250061	-0.472665	-0.436088	0.187924	0.498769	0.458564	-0.0670821	-0.204112	0.281616	-0.740021	-0.408936	-0.417303	-0.223855
mz_326	-0.686711	-0.81311	-0.640665	0.248418	0.700829	-0.873215	0.501953	-0.353793	0.678758	-0.817545	-0.00330325	-0.05236	-0.847828	-0.0912358	-0.136812	-0.0894249	-0.197333	-0.533022	-0.321838	-0.472044	-0.547471	-0.519605	-0.901119	-0.245369	-0.209322	-0.119776	0.25766	0.329585	0.726821	0.745143	-0.0270778	-0.383944	-0.389774	-0.344141	-0.453674	-0.344557	-0.307393	-0.46933	-0.259857	-0.035846	0.593044	0.508112	0.121059	-0.214875	0.537656	-0.833943	-0.504801	-0.405884	-0.30947
mz_327	-0.307293	-0.457763	-0.39481	0.223005	0.407149	-0.486755	0.335158	0.118581	0.606714	-0.475131	0.348205	0.274206	-0.376685	-0.451905	-0.423874	-0.308322	-0.43983	-0.43833	-0.557507	-0.456654	-0.636012	-0.564761	-0.643691	-0.329509	-0.258261	-0.1856	0.0275867	0.300155	0.215222	0.225145	-0.274932	-0.463538	-0.385193	-0.437082	-0.46612	-0.368411	-0.343145	-0.506142	-0.295479	0.0365088	0.409498	0.466846	0.091331	-0.504899	0.25353	-0.310229	-0.215587	-0.423526	-0.267781
mz_328	-0.758382	-0.811854	-0.388891	-0.0380902	0.555894	-0.872467	0.215296	-0.479015	0.545752	-0.801642	-0.160946	-0.302305	-0.814827	-0.150757	-0.161298	0.16163	-0.0100119	-0.361316	-0.261755	-0.171232	-0.274935	-0.383448	-0.640791	0.1362	0.199487	0.224737	0.137968	0.040928	0.839675	0.794533	-0.0353203	0.0402813	-0.114627	-0.0728409	-0.121383	-0.00458506	0.0709755	-0.195625	-0.12109	-0.230475	0.260137	0.139552	-0.3108	0.0825796	0.323689	-0.823755	-0.675683	-0.348711	0.0273396
mz_329	-0.484481	-0.581149	-0.599221	0.375701	0.574261	-0.594244	-0.109948	-0.564007	0.294001	-0.664399	-0.335293	-0.463706	-0.600584	-0.106391	0.0506065	0.212831	0.169825	0.0163962	-0.109099	0.158146	0.051899	-0.0582845	-0.245754	0.444719	0.535269	0.455789	-0.129611	-0.346898	0.49676	0.518375	-0.294628	0.341846	0.205741	0.274953	0.267144	0.373166	0.402033	0.185689	0.287727	-0.440752	-0.0743182	-0.1655	-0.483992	0.211437	0.167869	-0.533517	-0.705621	-0.123871	0.430982
mz_330	-0.820276	-0.75145	-0.519797	-0.0866077	0.744784	-0.822394	0.231824	-0.332672	0.548139	-0.725206	-0.041506	-0.323576	-0.733151	-0.0363376	-0.162892	0.178831	0.200178	-0.132241	-0.449062	-0.161586	-0.157869	-0.431706	-0.571352	0.080166	0.125283	0.253646	0.162018	-0.0573233	0.502041	0.57037	0.0491388	-0.0735424	-0.0364948	-0.0212601	-0.113414	-0.0780117	0.0422766	-0.093881	-0.086298	0.071638	0.258129	0.232205	-0.168482	0.0821203	0.464593	-0.575169	-0.262691	-0.155026	-0.0532841
mz_331	0.236194	0.347016	0.544922	-0.206101	-0.571047	0.276667	-0.0630858	0.0656242	-0.322117	0.303301	-0.0802999	0.480514	0.424392	-0.171188	0.203975	-0.0354785	-0.632773	-0.336261	-0.0494247	-0.178602	-0.26002	0.044429	0.104628	-0.10668	-0.0360791	0.164932	0.268364	-0.444514	-0.231799	-0.341624	-0.681728	0.0324859	-0.187319	-0.208529	-0.175959	-0.0482688	-0.0940264	-0.177821	-0.303073	-0.344712	-0.25593	-0.0546433	-0.0792037	-0.221788	-0.71335	0.0434144	-0.289114	-0.279816	0.0311082
mz_332	0.760994	0.860078	0.59818	0.0631966	-0.810148	0.830578	0.0421982	0.536192	-0.553468	0.81041	0.205271	0.707214	0.930443	-0.274116	-0.0414527	-0.458376	-0.513198	-0.158	0.11074	-0.174376	-0.137599	0.378325	0.468791	-0.323109	-0.294529	-0.257269	0.121811	-0.324937	-0.853921	-0.902312	-0.279976	-0.16344	-0.285706	-0.321178	-0.185334	-0.232568	-0.29771	-0.163443	-0.0943135	-0.11731	-0.0864203	0.0725754	0.341948	-0.336342	-0.809248	0.466188	0.337728	-0.18981	-0.139154
mz_333	0.722015	0.903479	0.681364	-0.148594	-0.805047	0.83426	-0.0842974	0.451397	-0.615794	0.844912	0.110314	0.668518	0.91806	-0.142286	-0.0347659	-0.373157	-0.507378	-0.139363	0.0105731	-0.145534	-0.138862	0.225502	0.505488	-0.266694	-0.269753	-0.11717	0.146617	-0.265461	-0.756925	-0.830418	-0.265791	-0.127697	-0.267772	-0.279406	-0.156849	-0.16979	-0.220392	-0.111426	-0.257411	0.0477221	-0.179436	0.040333	0.302157	-0.337878	-0.807661	0.445853	0.269391	-0.20501	-0.193233
mz_334	0.632868	0.751265	0.438323	0.0552051	-0.585091	0.645933	0.0230091	0.421164	-0.485947	0.703794	0.140029	0.604693	0.775944	-0.196098	-0.00140885	-0.367823	-0.46623	-0.157105	-0.229998	-0.135247	-0.152574	0.0924391	0.303409	-0.252882	-0.250626	-0.113595	0.0877075	-0.314372	-0.680389	-0.694465	-0.28853	-0.183637	-0.241876	-0.276155	-0.163685	-0.18948	-0.220291	-0.131373	-0.247784	0.0546144	-0.0677017	0.102051	0.294075	-0.407799	-0.617981	0.422727	0.256981	-0.2703	-0.278124
mz_335	0.390379	0.286301	0.300858	-0.224282	-0.28671	0.320484	0.0247534	0.164049	-0.228627	0.260223	0.0383664	0.327514	0.268915	0.456004	0.195678	-0.204008	-0.182001	0.0680744	0.470144	-0.403587	-0.172162	0.248291	0.25851	-0.478469	-0.480246	-0.203039	0.173995	0.23624	-0.396503	-0.374778	-0.107949	-0.235246	-0.197411	-0.256979	-0.372463	-0.417191	-0.440015	-0.330615	0.0386053	0.0575569	0.174334	0.213028	0.310742	-0.431124	0.045909	0.318459	0.391956	0.389288	-0.0929341
mz_336	-0.501755	-0.33	-0.378353	0.156505	0.381904	-0.353623	0.306072	0.0253162	0.428489	-0.306954	0.198996	0.201473	-0.290491	-0.435866	-0.411432	-0.232472	-0.229271	-0.39097	-0.383134	-0.308509	-0.425679	-0.395741	-0.514726	-0.20509	-0.17313	-0.1944	0.219424	0.0833487	0.0972955	0.0896501	-0.0269749	-0.423817	-0.380462	-0.302529	-0.293122	-0.216827	-0.218015	-0.233687	-0.352353	0.233831	0.275806	0.440364	0.25529	-0.00828236	-0.0410047	-0.516835	-0.180372	-0.457302	-0.238971
mz_337	0.0777674	0.313839	0.263012	-0.245778	-0.23117	0.30287	0.185026	0.104113	-0.221674	0.231413	-0.00645445	0.244509	0.259165	0.204913	0.26724	0.159652	-0.316859	-0.132681	-0.167085	-0.0357045	-0.0825355	-0.257594	0.0471012	-0.145182	-0.201096	0.0690495	0.589359	0.0226256	-0.179386	-0.125163	-0.0338171	-0.164469	-0.143123	-0.0900192	-0.128772	-0.105148	-0.0907111	0.0259564	-0.230325	0.073146	-0.16083	0.0863443	0.342718	-0.118555	-0.16813	0.116157	0.117324	-0.141306	-0.3436
mz_338	-0.515232	-0.700572	-0.528097	0.354173	0.500654	-0.776561	0.176854	-0.497893	0.347641	-0.599369	-0.258247	-0.0477276	-0.672879	-0.338083	-0.03627	-0.182339	-0.262929	-0.378653	-0.185277	-0.302715	-0.424131	-0.313271	-0.637108	-0.122838	-0.023403	-0.141084	0.226817	0.0457894	0.559618	0.556754	-0.187134	-0.293023	-0.288762	-0.22908	-0.247838	-0.100779	-0.142206	-0.339815	-0.265184	-0.120427	0.408313	0.410856	0.00390389	-0.115793	0.201395	-0.734361	-0.555311	-0.415756	-0.0962873
mz_339	-0.452524	-0.277689	-0.26047	0.174371	0.249531	-0.282187	0.607233	0.189106	0.451039	-0.358112	0.342274	0.214975	-0.186638	-0.534171	-0.268032	-0.0232486	-0.380592	-0.489259	-0.642888	-0.176673	-0.365982	-0.490217	-0.548791	-0.112526	-0.0643415	-0.0300028	0.506845	-0.0965377	0.0770948	0.147085	-0.0685237	-0.303179	-0.314928	-0.285257	-0.253021	-0.215358	-0.140167	-0.169621	-0.156289	-0.186639	0.161893	0.31068	0.211877	-0.0892226	-0.0557577	-0.379091	-0.156918	-0.624684	-0.327053
mz_340	-0.580287	-0.676815	-0.443766	0.143257	0.508898	-0.786063	0.290329	-0.458034	0.48075	-0.677821	-0.17046	-0.12531	-0.731823	-0.13137	-0.162972	-0.169548	-0.0800194	-0.533696	-0.176778	-0.400775	-0.407379	-0.198323	-0.671396	-0.100645	-0.0626854	-0.06642	0.149482	0.163979	0.746598	0.665764	0.0282624	-0.162666	-0.335382	-0.281623	-0.332029	-0.203684	-0.196713	-0.349218	-0.327615	-0.0581089	0.472741	0.371246	-0.0127952	0.0259851	0.305537	-0.899315	-0.558171	-0.428381	-0.172397
mz_341	0.2349	0.133826	-0.117527	0.278413	0.0145377	-0.092431	-0.102082	-0.155986	-0.0655767	0.0651877	-0.153764	0.328659	0.0263519	-0.296932	-0.369422	-0.66221	-0.396096	-0.462606	-0.356693	-0.415635	-0.502127	-0.0897779	-0.146725	-0.178671	-0.147041	-0.0726581	-0.232442	0.000795202	0.133689	-0.0133403	-0.265011	-0.194111	-0.447243	-0.41213	-0.302956	-0.170634	-0.217577	-0.378526	-0.520566	0.156782	0.325864	0.340921	0.0604533	-0.456091	-0.249352	-0.402281	-0.445734	-0.595151	-0.243811
mz_342	-0.826916	-0.894111	-0.71146	0.149826	0.833518	-0.912436	0.144619	-0.504669	0.647825	-0.85522	-0.139876	-0.367466	-0.922287	-0.00388555	-0.0277997	0.193101	0.118222	-0.195839	-0.292136	-0.137243	-0.232112	-0.493162	-0.737405	0.0742904	0.0954212	0.0983497	0.0633736	0.225254	0.760785	0.788119	-0.0360186	-0.134934	-0.0373921	0.0192732	-0.110129	0.0200012	0.0387669	-0.105823	-0.181853	0.0915933	0.25387	0.230149	-0.137236	0.141217	0.590774	-0.696068	-0.497226	-0.141579	-0.0221665
mz_343	-0.198488	-0.51334	-0.22555	0.238259	0.206213	-0.513691	0.19877	-0.105987	0.268354	-0.413188	0.0261074	0.0638459	-0.340002	-0.439022	-0.129599	-0.250912	-0.242363	-0.153713	-0.0284003	-0.301748	-0.312456	-0.0154078	-0.301728	-0.203762	-0.0392615	-0.171818	0.124891	-0.0868779	0.106787	0.155546	-0.228498	-0.199664	-0.174242	-0.257227	-0.248768	-0.227619	-0.213735	-0.400499	0.131883	-0.395192	0.370805	0.29551	-0.108061	-0.318497	0.134905	-0.231908	-0.119759	-0.140265	0.0913037
mz_344	0.161158	0.329254	0.210712	0.0106474	-0.261989	0.14788	0.223926	0.165666	-0.141392	0.267407	0.0766908	0.710928	0.329888	-0.305456	-0.178386	-0.432118	-0.775776	-0.589954	-0.485369	-0.508231	-0.631285	-0.335942	-0.217945	-0.400238	-0.355301	-0.0382661	0.302231	-0.227933	-0.247525	-0.315557	-0.512316	-0.411135	-0.579764	-0.552637	-0.489072	-0.384051	-0.386491	-0.476195	-0.582896	0.0497173	0.200826	0.418278	0.29247	-0.604777	-0.565379	-0.204465	-0.263816	-0.656481	-0.43152
mz_345	0.57903	0.444507	0.360114	0.027799	-0.453258	0.431647	-0.462503	0.208151	-0.39258	0.456152	0.00391614	0.156588	0.538563	-0.266568	0.0185068	-0.116193	-0.172494	0.253789	-0.0782187	0.240022	0.141279	0.185944	0.49337	0.150843	0.205194	0.11143	-0.341317	-0.285627	-0.436381	-0.468164	-0.382762	0.215861	0.224532	0.123845	0.238822	0.255015	0.204339	0.143235	0.0554374	-0.133014	-0.382957	-0.297158	-0.279069	-0.192999	-0.403711	0.610109	0.12105	0.0738978	0.254059
mz_346	0.471045	0.608824	0.518399	-0.0534853	-0.62975	0.525597	0.157898	0.512607	-0.209667	0.514202	0.328792	0.822786	0.685195	-0.43365	-0.236837	-0.464736	-0.784579	-0.510706	-0.30321	-0.397068	-0.497888	-0.0416096	0.0675784	-0.393885	-0.35401	-0.163779	0.170688	-0.193294	-0.54339	-0.655259	-0.508538	-0.295461	-0.475915	-0.521025	-0.421199	-0.350919	-0.390422	-0.382002	-0.450785	-0.0661923	-0.0132681	0.223337	0.269177	-0.498254	-0.754891	0.173398	0.0216008	-0.506522	-0.292224
mz_347	0.412407	0.573654	0.343834	-0.127369	-0.347026	0.381596	0.243078	0.313839	-0.219217	0.430262	0.164487	0.519471	0.449841	0.0111517	-0.239051	-0.322047	-0.462439	-0.431852	-0.51168	-0.298271	-0.3749	-0.313211	-0.021804	-0.258796	-0.323022	0.0484088	0.0758302	0.0198709	-0.151317	-0.211973	-0.053448	-0.203894	-0.422229	-0.415907	-0.329312	-0.341196	-0.266373	-0.313296	-0.414376	0.169546	0.191779	0.207734	0.269473	-0.604321	-0.310605	0.0258599	-0.064791	-0.534067	-0.565931
mz_348	0.098553	0.0405415	0.223	-0.0178834	-0.252921	0.0114412	0.0242636	0.10535	0.0572488	-0.108157	0.108984	0.301982	0.17238	-0.468805	-0.0771945	-0.166993	-0.543702	-0.358103	-0.299945	-0.205001	-0.310106	0.0507447	0.0148036	-0.0231775	0.102862	0.184991	0.220069	-0.333883	-0.13289	-0.204524	-0.622733	0.0800148	-0.147636	-0.231107	-0.186703	-0.0441519	-0.0521176	-0.163502	-0.138768	-0.516212	-0.200083	0.00225621	-0.196569	-0.21876	-0.414897	-0.0209455	-0.237532	-0.368397	0.124591
mz_349	-0.124441	-0.126488	-0.114752	0.13636	0.0499315	-0.128371	0.621152	0.157991	0.404157	-0.283256	0.297807	0.356581	-0.157659	-0.0685476	-0.174824	-0.36749	-0.340408	-0.677891	0.00678702	-0.614054	-0.511495	0.0607157	-0.452679	-0.477185	-0.485743	-0.372285	0.366165	0.320983	0.131897	0.0644367	0.0316563	-0.373237	-0.554509	-0.548086	-0.620156	-0.567807	-0.58517	-0.475802	-0.257101	-0.109595	0.458105	0.467723	0.458188	-0.145193	0.0834377	-0.48093	-0.0416938	-0.355206	-0.38148
mz_350	-0.572182	-0.632047	-0.230599	-0.0284167	0.363592	-0.684762	0.240356	-0.258495	0.538663	-0.68768	0.0146211	-0.0922712	-0.585299	-0.170524	-0.104615	0.208626	-0.225144	-0.420115	-0.366194	-0.203179	-0.354655	-0.416337	-0.624002	0.102509	0.182402	0.337797	0.0194021	-0.113653	0.650925	0.597328	-0.400543	0.087687	-0.0968925	-0.118669	-0.176917	-0.0513132	0.0350907	-0.268484	-0.0763691	-0.417333	0.14222	0.0251824	-0.413514	-0.137015	0.156803	-0.584927	-0.712967	-0.344151	0.0800795
Hemi CO (deconv ssNMR)	-0.268121	-0.197581	-0.139208	0.216348	0.0796964	-0.157187	-0.00932345	-0.285582	0.325625	-0.516155	-0.0965241	-0.365816	-0.484145	-0.125302	-0.331285	-0.0169013	0.182008	-0.178887	-0.0166584	-0.0424122	-0.0474441	0.0586507	-0.130415	0.234665	0.272906	0.184106	-0.130966	0.173014	0.665188	0.549261	0.232072	0.307468	0.0141781	-0.0062803	0.0253367	0.0759088	0.14707	-0.0606986	0.0664518	-0.277087	0.129996	-0.0826137	-0.404886	0.137301	0.259133	-0.492839	-0.390591	-0.179724	0.16479
Arom 161 (deconv ssNMR)	-0.583221	-0.740934	-0.566708	0.143675	0.673937	-0.711508	0.141301	-0.572371	0.425073	-0.727171	-0.286676	-0.497514	-0.873236	0.229447	-0.00895572	0.332966	0.212253	-0.0673991	-0.228371	0.0136766	-0.0942275	-0.574336	-0.55563	0.192459	0.177764	0.272683	0.108279	0.2812	0.89834	0.948473	0.249396	0.022872	0.0274381	0.114172	0.0305545	0.0808618	0.18441	-0.0487977	-0.00336541	0.0248562	0.272684	0.0972543	-0.210995	0.0143402	0.64745	-0.659599	-0.548822	-0.132435	-0.0900974
Lignin 153 (deconv ssNMR)	0.266921	0.249649	0.257692	0.130532	-0.394474	0.277874	0.503707	0.264955	0.126929	0.118078	0.269223	0.76334	0.0983016	-0.290689	-0.472989	-0.686485	-0.752184	-0.83558	-0.218634	-0.829814	-0.85848	-0.274967	-0.458359	-0.714368	-0.695618	-0.467513	0.218004	0.348163	0.0917252	-0.0595094	-0.08136	-0.617426	-0.848346	-0.865285	-0.819554	-0.766115	-0.759288	-0.881976	-0.638591	0.116853	0.698147	0.661976	0.44331	-0.742028	-0.243066	-0.441124	-0.177876	-0.671255	-0.648905
Lignin 148 (deconv ssNMR)	-0.637698	-0.654084	-0.422417	0.203123	0.470956	-0.656548	0.556522	-0.174223	0.603801	-0.628408	0.111248	0.0636238	-0.669008	-0.183075	-0.220459	0.015608	-0.272996	-0.534938	-0.29554	-0.383685	-0.524786	-0.593823	-0.87518	-0.218317	-0.180276	-0.0923973	0.18446	0.214561	0.657266	0.654767	-0.0348168	-0.340975	-0.379132	-0.339293	-0.394552	-0.33977	-0.265675	-0.498701	-0.178173	-0.125349	0.55589	0.386332	0.0309038	-0.265719	0.309474	-0.744744	-0.548239	-0.44815	-0.286402
Lignin 146 (deconv ssNMR)	-0.607358	-0.858792	-0.571728	0.168214	0.677551	-0.801759	0.289886	-0.448246	0.647686	-0.866004	-0.0935813	-0.352276	-0.93643	-0.0287723	-0.0846804	0.017413	0.132805	-0.242673	-0.158973	-0.263224	-0.263504	-0.331257	-0.70348	-0.0825014	-0.0514777	-0.118858	0.17911	0.402904	0.769784	0.805899	0.211238	-0.218358	-0.140114	-0.123213	-0.24246	-0.163281	-0.13706	-0.248053	-0.124707	0.0342097	0.464339	0.364567	-0.00432203	0.0629124	0.728663	-0.693714	-0.288105	-0.130208	-0.134455
Lignin 136 (deconv ssNMR)	0.121383	0.0117374	0.105051	0.226328	-0.258114	0.0971938	0.613394	0.228905	0.255092	-0.0679091	0.293549	0.693378	-0.0726112	-0.363815	-0.454218	-0.627261	-0.762593	-0.826601	-0.088291	-0.83934	-0.874739	-0.284545	-0.542985	-0.755372	-0.705207	-0.570881	0.394072	0.466659	0.187145	0.0698067	0.00435802	-0.672599	-0.849594	-0.871758	-0.848047	-0.798346	-0.792557	-0.925264	-0.517802	-0.0226648	0.757238	0.713678	0.463758	-0.693613	-0.111571	-0.511915	-0.14869	-0.622797	-0.605618
Lignin 132 (deconv ssNMR)	-0.765584	-0.879217	-0.615034	0.0860993	0.800216	-0.88106	0.203782	-0.565152	0.574858	-0.856505	-0.218652	-0.531993	-0.977426	0.133996	0.0545779	0.30884	0.269631	-0.0735111	-0.195352	0.000799583	-0.0761868	-0.481027	-0.682847	0.154573	0.154121	0.121462	0.0927358	0.28229	0.872525	0.947492	0.213948	-0.0480423	0.0561002	0.123288	0.00670636	0.0670275	0.125055	-0.0348632	0.0192694	0.0149663	0.306718	0.151757	-0.153294	0.154091	0.749534	-0.669243	-0.459584	-0.0676803	-0.0463146
Lignin 119 (deconv ssNMR)	-0.680145	-0.88182	-0.617052	0.167068	0.743054	-0.845914	0.255066	-0.469635	0.653652	-0.855251	-0.108589	-0.382277	-0.95734	0.0730389	-0.108329	0.125825	0.144899	-0.225714	-0.204537	-0.199046	-0.261858	-0.481855	-0.738623	-0.00281641	0.00233053	0.0092246	0.0465091	0.42695	0.880434	0.903346	0.189564	-0.153405	-0.103086	-0.0636916	-0.180472	-0.103143	-0.0495741	-0.230477	-0.103543	0.056204	0.439512	0.273265	-0.100454	-0.000238801	0.738953	-0.715002	-0.452307	-0.142856	-0.127572
Lignin 110 (deconv ssNMR)	-0.425791	-0.629796	-0.34952	0.109041	0.401531	-0.513238	0.378438	-0.292469	0.614145	-0.747332	0.0190011	-0.210002	-0.822167	0.129573	-0.173657	0.020752	0.0449006	-0.292857	0.0313183	-0.39508	-0.355839	-0.345247	-0.625438	-0.240476	-0.234041	-0.170173	0.263994	0.610028	0.737453	0.737541	0.322562	-0.27223	-0.258588	-0.247697	-0.385999	-0.34309	-0.283886	-0.399758	-0.114346	0.0483005	0.529698	0.391147	0.078701	-0.0801096	0.690823	-0.646683	-0.206114	-0.0617433	-0.212994
Sac 105 (deconv ssNMR)	0.0345366	-0.162417	0.0407347	-0.100061	-0.0522421	0.061337	0.0835854	0.036601	0.395692	-0.413104	0.193482	-0.22233	-0.350974	0.260841	0.0601362	0.354709	0.168196	0.144337	0.397489	-0.0393478	0.0418509	-0.00719424	-0.0830922	-0.065853	-0.0657398	-0.041477	0.161715	0.460153	0.222212	0.241519	0.145053	0.0305671	0.14603	0.0858868	-0.0813914	-0.0850914	-0.0613788	-0.0307692	0.243458	-0.114035	-0.0546827	-0.0722568	-0.0904604	0.180672	0.446774	0.0455109	0.183042	0.472362	0.205159
Sac 100 (deconv ssNMR)	-0.103732	-0.195275	-0.0786965	0.323471	-0.0487365	-0.116725	0.29599	0.235143	0.274671	-0.093082	0.305124	0.396714	-0.101642	-0.429081	-0.402981	-0.48122	-0.344731	-0.33436	0.155405	-0.524978	-0.496111	0.00731154	-0.336666	-0.513996	-0.415983	-0.540984	-0.0656253	0.256545	0.00514152	-0.0593566	-0.0418468	-0.437444	-0.426816	-0.521188	-0.498021	-0.519888	-0.53784	-0.665841	-0.1068	-0.0751189	0.57896	0.430957	0.12985	-0.427272	-0.00502578	-0.177788	0.0572538	-0.148956	-0.129473
Cel C4 89 (deconv ssNMR)	-0.420505	-0.671535	-0.522913	0.0671535	0.601504	-0.509711	0.0149796	-0.353246	0.496778	-0.697781	-0.0804302	-0.608373	-0.730932	0.365591	0.228003	0.560834	0.449361	0.262418	0.132275	0.220727	0.218352	-0.234568	-0.305864	0.241398	0.20578	0.167818	0.073949	0.363084	0.553195	0.651221	0.21776	0.128648	0.338135	0.369224	0.186491	0.215524	0.242639	0.252808	0.264128	0.0101302	-0.0869698	-0.130827	-0.176287	0.407395	0.740779	-0.204578	-0.096011	0.4031	0.211007
Cel C4 84 (deconv ssNMR)	-0.363993	-0.646825	-0.291215	0.0441618	0.355826	-0.450067	0.413927	0.0977719	0.674859	-0.596736	0.359912	-0.0340912	-0.572286	-0.0196854	-0.184991	0.0110079	0.0160057	-0.120685	0.204229	-0.375661	-0.300721	-0.187075	-0.516408	-0.383759	-0.344979	-0.388404	0.16271	0.592661	0.288575	0.33903	0.191978	-0.374444	-0.173322	-0.249604	-0.407616	-0.430441	-0.403893	-0.41742	0.10408	-0.00893987	0.44829	0.351014	0.138306	-0.097899	0.617707	-0.215349	0.188164	0.221383	-0.0641689
Lignin Cb (deconv ssNMR)	0.116066	0.00390023	0.0995907	0.228493	-0.252364	0.0910501	0.611575	0.224819	0.265076	-0.0803009	0.294359	0.685007	-0.0836804	-0.361219	-0.451835	-0.618758	-0.756866	-0.822824	-0.0843745	-0.836862	-0.872382	-0.285011	-0.548169	-0.750716	-0.69965	-0.566652	0.388123	0.468182	0.19536	0.0782917	0.000108568	-0.667417	-0.842649	-0.866105	-0.845208	-0.794637	-0.788556	-0.923663	-0.510748	-0.0284205	0.755112	0.708514	0.454142	-0.688929	-0.102537	-0.513676	-0.153563	-0.61466	-0.596101
Hemi C4 (deconv ssNMR)	-0.252469	-0.151882	-0.0957644	0.183581	0.0446267	-0.111911	-0.095799	-0.240238	0.307513	-0.471883	-0.0677535	-0.371749	-0.414983	-0.14401	-0.377564	0.0282427	0.205706	-0.125634	-0.0556011	0.0139999	-0.0053964	0.061616	-0.055161	0.309756	0.352549	0.287951	-0.226381	0.0881658	0.610531	0.479836	0.162268	0.394636	0.0800906	0.0469223	0.0904651	0.140557	0.225498	-0.00460497	0.0903555	-0.284369	0.0275708	-0.176551	-0.514404	0.15428	0.17991	-0.418901	-0.403437	-0.151187	0.250057
Sac 75 (deconv ssNMR)	-0.188494	-0.325927	-0.109304	-0.0417876	0.172188	-0.260384	0.129613	-0.113666	0.0504382	-0.0216265	-0.0704681	-0.0186991	-0.355359	0.288679	-0.0197087	-0.0648158	0.147006	0.107832	0.281677	-0.265644	-0.14009	-0.275981	-0.292184	-0.436305	-0.476257	-0.478714	0.103044	0.579507	0.254899	0.306085	0.532318	-0.490819	-0.194787	-0.197743	-0.287265	-0.38759	-0.374865	-0.398387	-0.191988	0.552686	0.583565	0.424274	0.308241	-0.216632	0.505557	-0.113195	0.310827	0.265262	-0.361892
Lignin Ca (deconv ssNMR)	0.116066	0.00390023	0.0995907	0.228493	-0.252364	0.0910501	0.611575	0.224819	0.265076	-0.0803009	0.294359	0.685007	-0.0836804	-0.361219	-0.451835	-0.618758	-0.756866	-0.822824	-0.0843745	-0.836862	-0.872382	-0.285011	-0.548169	-0.750716	-0.69965	-0.566652	0.388123	0.468182	0.19536	0.0782917	0.000108568	-0.667417	-0.842649	-0.866105	-0.845208	-0.794637	-0.788556	-0.923663	-0.510748	-0.0284205	0.755112	0.708514	0.454142	-0.688929	-0.102537	-0.513676	-0.153563	-0.61466	-0.596101
Sac 72 (deconv ssNMR)	-0.237818	-0.400644	-0.348492	0.154837	0.337068	-0.292752	-0.0797457	-0.0634185	0.548747	-0.653965	0.175007	-0.367362	-0.342887	-0.0860276	0.0889338	0.423708	0.160058	0.0767415	0.0550046	0.229914	0.156818	0.165541	-0.100689	0.429335	0.49967	0.417533	-0.262751	-0.180353	0.214465	0.204932	-0.493973	0.491641	0.410882	0.34709	0.248705	0.354621	0.354312	0.295266	0.485163	-0.643748	-0.438942	-0.454795	-0.571149	0.379902	0.1757	-0.0266884	-0.355334	0.238378	0.666627
Cel C6 65 (deconv ssNMR)	-0.365624	-0.548054	-0.389151	0.116467	0.397832	-0.366287	0.0841344	-0.250915	0.618677	-0.822948	0.0530402	-0.500098	-0.694274	0.0811503	0.00844806	0.327705	0.263499	0.057552	0.160832	0.0546709	0.0512542	-0.019995	-0.2623	0.203924	0.241282	0.146703	0.0352844	0.337188	0.553946	0.582664	0.0672972	0.21612	0.224671	0.193472	0.0590246	0.122367	0.153211	0.0878261	0.358846	-0.36241	-0.0376999	-0.123541	-0.305449	0.282211	0.621908	-0.278269	-0.199466	0.242489	0.338953
Cel C6 63 (deconv ssNMR)	-0.0961624	0.0175933	0.0153821	0.263028	-0.117995	-0.0448537	0.0198994	0.112027	0.125561	-0.0370563	0.142585	0.338425	0.0772036	-0.440001	-0.209988	-0.292092	-0.379445	-0.334175	-0.180498	-0.290968	-0.353292	0.0498817	-0.213617	-0.116335	-0.00216976	0.00316987	-0.321702	-0.351674	-0.0511491	-0.157642	-0.601902	-0.0250462	-0.186747	-0.280398	-0.224825	-0.155165	-0.169691	-0.370242	-0.123232	-0.309293	0.143025	0.062704	-0.267855	-0.328215	-0.34885	-0.109835	-0.336558	-0.278387	0.133552
Lignin Cg (deconv ssNMR)	0.116066	0.00390023	0.0995907	0.228493	-0.252364	0.0910501	0.611575	0.224819	0.265076	-0.0803009	0.294359	0.685007	-0.0836804	-0.361219	-0.451835	-0.618758	-0.756866	-0.822824	-0.0843745	-0.836862	-0.872382	-0.285011	-0.548169	-0.750716	-0.69965	-0.566652	0.388123	0.468182	0.19536	0.0782917	0.000108568	-0.667417	-0.842649	-0.866105	-0.845208	-0.794637	-0.788556	-0.923663	-0.510748	-0.0284205	0.755112	0.708514	0.454142	-0.688929	-0.102537	-0.513676	-0.153563	-0.61466	-0.596101
Lignin Ome (deconv ssNMR)	-0.0561897	-0.0249544	-0.0115976	0.265729	-0.112856	-0.00917966	0.28538	-0.0187991	0.390792	-0.351022	0.147637	0.338582	-0.255412	-0.269865	-0.198344	-0.185269	-0.565536	-0.616363	-0.371787	-0.45942	-0.625905	-0.383587	-0.602289	-0.21903	-0.148108	0.0446418	-0.0903545	0.00501628	0.384935	0.282383	-0.555928	-0.181087	-0.376407	-0.420971	-0.43793	-0.303653	-0.279813	-0.555651	-0.294471	-0.29809	0.32394	0.227573	-0.153295	-0.521822	-0.0545908	-0.437364	-0.629256	-0.493655	-0.145096
Hemi AC (deconv ssNMR)	-0.186986	-0.0688665	-0.206467	0.323027	0.0796772	-0.0115932	-0.181983	-0.156672	0.428025	-0.572609	0.0492027	-0.433063	-0.364109	-0.187155	-0.269378	0.156112	0.206455	-0.0167395	-0.198389	0.185632	0.0860794	0.0773588	-0.0258791	0.494291	0.553058	0.480065	-0.460071	-0.0631331	0.493336	0.403556	-0.182054	0.57191	0.299973	0.22404	0.2473	0.32986	0.400363	0.173338	0.306153	-0.505581	-0.222512	-0.400234	-0.706474	0.152314	0.215	-0.182236	-0.477083	-0.0587331	0.476182
Total Lignin / All (deconv ssNMR)	-0.29261	-0.445097	-0.23473	0.187778	0.234939	-0.409375	0.556714	-0.244489	0.506471	-0.557404	0.0142042	0.194534	-0.672235	-0.0827095	-0.261125	-0.276498	-0.390217	-0.667688	-0.28322	-0.655878	-0.721391	-0.589408	-0.865301	-0.472938	-0.453515	-0.282201	0.329655	0.478197	0.689209	0.655799	0.0923744	-0.558753	-0.618731	-0.575234	-0.645253	-0.562226	-0.514839	-0.714007	-0.466278	0.110905	0.77832	0.664075	0.276735	-0.473304	0.398124	-0.830356	-0.440797	-0.527808	-0.548637
[truncated: 289 more columns]
